# Supplementary material
Source: PubMed Central journal article supplement (PMC4290912)
Supplement: JCM.01317-14_zjm999093944so2.pdf [file JCM.01317-14_zjm999093944so2.pdf]

Supplementary Table 1. Primers used in diagnostic and real-time RT-PCR and PCR

| Virus species      | primer ID            | Sequence 5'-3'                    | Application        | Conc.  |
|--------------------|----------------------|-----------------------------------|--------------------|--------|
| Human Astrovirus   | F-AST                | ACRACATGTGCTGCTGTTACT             | RT-PCR             | 10 uM  |
|                    | R-AST                | ACYAGATTCGAGATCCGTGA              | RT-PCR             | 10 uM  |
|                    | ORF1bG-F             | ATGAATTATTTTGATACTGAGGAAGACTTGGAA | qRT-PCR            | 100 nM |
|                    | ORF1bG-R             | CTTTCTTGAGAAATAGATACCAAAGTACTTCAG | qRT-PCR            | 100 nM |
| Human Adenovirus   | hex1deg              | GCCSCARTGGKCWATACATGCACAT         | PCR and qPCR       | 120 nM |
|                    | hex2deg              | CAGCACSCCICGRATGTCAAA             | PCR                | 120 nM |
|                    | AQ1                  | GCCACGGTGGGGTTTCTAAACTT           | qPCR               | 120 nM |
| Calicivirus        | p290                 | GATTACTCCARGTGGGAYTCMAC           | PCR                | 10 uM  |
|                    | p289                 | TGACRATKTMATCATMCMCRTA            | RT-PCR             | 10 uM  |
| Norwalk virus      | JV12Y                | ATACCACTATGATGCAGATTA             | qRT-PCR            | 300 nM |
|                    | JV13I                | TCATCATCACCATAGAAAGAG             | qRT-PCR            | 300 nM |
| Human Enterovirus  | 5'UTR-F              | CGGCCCTGAATGCGGCTAA               | RT-PCR and qRT-PCR | 900 nM |
|                    | 5'UTR-R              | ATTGTCACCATAAGCAGCC               | RT-PCR and qRT-PCR | 900 nM |
| Rotavirus A        | P1-VP6               | AAGTAGCTGGATTTGATTATTC            | RT-PCR             | 10 uM  |
|                    | P2-VP6               | GACTCACAAACTGCAGATTCAA            | RT-PCR             | 10 uM  |
|                    | F-gene10             | TCCTGGAATGGCGTATTTTC              | qRT-PCR            | 100 nM |
|                    | R-gene10             | GAGCAATCTTCATGGTTGGAA             | qRT-PCR            | 100 nM |
| Human Parechovirus | parechoF12           | CCARAAAYTCITGGGGYTC               | RT-PCR             | 400 nM |
|                    | parechoR12           | AAICCYCTRTCYARRTAWGC              | RT-PCR             | 400 nM |
| Anellovirus        | NG779                | ACWKMCGAATGGCTGAGTTT              | RT-PCR             | 200 nM |
|                    | NG780                | RGTGRCGAATGGYWGAGTTT              | RT-PCR             | 200 nM |
|                    | NG781                | CCCKWGCCCCGARTTGCCCCT             | RT-PCR             | 200 nM |
|                    | NG782                | AYCTWGCCCGAATTGCCCT               | RT-PCR             | 200 nM |
|                    | NG785                | CCCCTTGACTBCGGTGTGTAA             | RT-PCR             | 200 nM |
|                    | NG792                | TTTATGCGYCYAGACGRAGA              | RT-PCR             | 200 nM |
|                    | NG793                | TTTAYCMYGCCAGACGGAGA              | RT-PCR             | 200 nM |
|                    | NG794                | TTTATGCCGCCAGACGRAGG              | RT-PCR             | 200 nM |
| NG791              | CTCACCTYSGGCWCCCGCCC | RT-PCR                            | 200 nM             |        |

Supplementary Table 2. Viral species included in microarray.

| Family/Subfamily <sup>a</sup> | Genus                            | Species                            | Number of Probes     |    |
|-------------------------------|----------------------------------|------------------------------------|----------------------|----|
| Adenoviridae                  | Atadenovirus                     | Bovine adenovirus D                | 8                    |    |
|                               |                                  | Mastadenovirus                     | Bovine adenovirus C  | 6  |
|                               |                                  |                                    | Canine adenovirus    | 13 |
|                               |                                  |                                    | Human adenovirus A   | 18 |
|                               |                                  |                                    | Human adenovirus B   | 10 |
|                               |                                  |                                    | Human adenovirus C   | 13 |
|                               |                                  |                                    | Human adenovirus E   | 7  |
|                               |                                  |                                    | Human adenovirus F   | 17 |
|                               |                                  |                                    | Human adenovirus G   | 16 |
|                               |                                  |                                    | Ovine adenovirus A   | 8  |
|                               |                                  |                                    | Porcine adenovirus A | 8  |
|                               |                                  |                                    | Porcine adenovirus B | 8  |
|                               |                                  |                                    | Porcine adenovirus C | 10 |
|                               | Herpesviridae/Alphaherpesvirinae | Simplexvirus                       | Human herpesvirus 1  | 8  |
| Human herpesvirus 2           |                                  |                                    | 7                    |    |
| Varicellovirus                |                                  | Human herpesvirus 3                | 7                    |    |
|                               |                                  | Phocid herpesvirus 1               | 12                   |    |
| Anelloviridae                 | Alphatorquevirus                 | Torque teno virus                  | 21                   |    |
|                               | Betatorquevirus                  | Torque teno mini virus             | 10                   |    |
|                               | Deltatorquevirus                 | Torque teno tupaia virus           | 12                   |    |
|                               | Epsilontorquevirus               | Torque teno tamarin virus          | 6                    |    |
|                               | Etatorquevirus                   | Torque teno felis virus            | 7                    |    |
|                               | Gammatorquevirus                 | Torque teno midi virus             | 6                    |    |
|                               | Iotatorquevirus                  | Torque teno sus virus              | 6                    |    |
|                               | Lambdatorquevirus                | Torque teno zalophus virus         | 6                    |    |
|                               | Thetatorquevirus                 | Torque teno canis virus            | 4                    |    |
| Zetatorquevirus               | Torque teno douroucouli virus    | 6                                  |                      |    |
| Arenaviridae                  | Arenavirus                       | Guanarito virus                    | 5                    |    |
|                               |                                  | Junin virus                        | 12                   |    |
|                               |                                  | Lymphocytic choriomeningitis virus | 15                   |    |
|                               |                                  | Machupo virus                      | 17                   |    |

|                                 |                                 |                                    |                                |                    |
|---------------------------------|---------------------------------|------------------------------------|--------------------------------|--------------------|
| Astroviridae                    | Avastrovirus                    | Chicken astrovirus                 | 11                             |                    |
|                                 |                                 | Duck astrovirus                    | 6                              |                    |
|                                 |                                 | Turkey astrovirus                  | 6                              |                    |
|                                 | Mamastrovirus                   | Bat astrovirus                     | 6                              |                    |
|                                 |                                 | Mamastrovirus 1                    | 4                              |                    |
|                                 |                                 | Mamastrovirus 2                    | 6                              |                    |
|                                 |                                 | Mink astrovirus                    | 6                              |                    |
|                                 |                                 | Ovine astrovirus                   | 4                              |                    |
|                                 |                                 | Porcine astrovirus                 | 5                              |                    |
|                                 |                                 | Human herpesvirus 5                | 8                              |                    |
| Herpesviridae/Betaherpesvirinae | Cytomegalovirus                 | 8                                  |                                |                    |
|                                 | Roseolovirus                    | 6                                  |                                |                    |
| Caliciviridae                   | Lagovirus                       | European brown hare syndrome virus | 6                              |                    |
|                                 |                                 | Rabbit hemorrhagic disease virus   | 8                              |                    |
|                                 | Norovirus                       | Bovine enteric calicivirus         | 10                             |                    |
|                                 |                                 | Norwalk virus                      | 12                             |                    |
|                                 |                                 | Sapporo virus                      | 14                             |                    |
|                                 | Vesivirus                       | Feline calicivirus                 | 22                             |                    |
|                                 |                                 | Rabbit vesivirus                   | 6                              |                    |
|                                 | Circoviridae                    | Circovirus                         | Beak and feather disease virus | 5                  |
|                                 |                                 |                                    | Canary circovirus              | 4                  |
|                                 |                                 |                                    | Porcine circovirus 1           | 5                  |
| Porcine circovirus 2            |                                 |                                    | 2                              |                    |
| Chicken anemia virus            |                                 |                                    | 2                              |                    |
| Alphacoronavirus                |                                 |                                    | 28                             |                    |
| Coronaviridae                   |                                 |                                    | Betacoronavirus                | Alphacoronavirus 1 |
|                                 | Porcine epidemic diarrhea virus | 8                                  |                                |                    |
|                                 | Betacoronavirus 1               | 10                                 |                                |                    |
|                                 | Gammacoronavirus                | Human coronavirus HKU1             | 8                              |                    |
|                                 |                                 | Murine coronavirus                 | 7                              |                    |
|                                 |                                 | SARS coronavirus                   | 8                              |                    |
|                                 |                                 | Avian coronavirus                  | 13                             |                    |
|                                 | Torovirus                       | Bovine torovirus                   | 6                              |                    |
|                                 |                                 | Equine torovirus                   | 6                              |                    |
|                                 |                                 | Human torovirus                    | 9                              |                    |
| Porcine torovirus               |                                 | 8                                  |                                |                    |
| Dengue virus                    |                                 | 9                                  |                                |                    |
| Flaviviridae                    | Flavivirus                      | 9                                  |                                |                    |

|                                 |                   |                                  |    |
|---------------------------------|-------------------|----------------------------------|----|
|                                 |                   | Japanese encephalitis virus      | 6  |
|                                 |                   | West Nile virus                  | 8  |
|                                 |                   | Yellow fever virus               | 7  |
|                                 |                   | Zika virus                       | 11 |
|                                 | Hepacivirus       | Hepatitis C virus                | 6  |
|                                 | Pestivirus        | Border disease virus             | 16 |
|                                 |                   | Bovine viral diarrhea virus 1    | 6  |
|                                 |                   | Bovine viral diarrhea virus 2    | 18 |
|                                 |                   | Classical swine fever virus      | 11 |
| Herpesviridae/Gammaparvovirinae | Lymphocryptovirus | Human herpesvirus 4              | 7  |
|                                 | Rhadinovirus      | Human herpesvirus 8              | 10 |
| Hepeviridae                     | Hepevirus         | Hepatitis E virus                | 10 |
| Orthomyxoviridae                | Influenzavirus A  | Influenza A virus                | 18 |
|                                 | Influenzavirus B  | Influenza B virus                | 22 |
|                                 | Influenzavirus C  | Influenza C virus                | 12 |
| Paramyxoviridae                 | Avulavirus        | Newcastle disease virus          | 14 |
|                                 | Morbillivirus     | Canine distemper virus           | 8  |
|                                 |                   | Measles virus                    | 12 |
|                                 |                   | Peste-des-petits-ruminants-virus | 8  |
|                                 |                   | Phocine distemper virus          | 12 |
|                                 |                   | Rinderpest virus                 | 12 |
|                                 | Respirovirus      | Bovine parainfluenza virus 3     | 9  |
| Parvoviridae/Parvovirinae       | Bocavirus         | Bovine parvovirus                | 8  |
|                                 |                   | Canine minute virus              | 6  |
|                                 |                   | Human bocavirus                  | 12 |
|                                 | Parvovirus        | Canine parvovirus                | 2  |
|                                 |                   | Feline panleukopenia virus       | 4  |
|                                 |                   | Chicken parvovirus               | 4  |
|                                 |                   | Minute virus of mice             | 4  |
|                                 |                   | Porcine parvovirus               | 7  |
| Picobirnaviridae                | Picobirnavirus    | Human picobirnavirus             | 11 |
|                                 |                   | Rabbit picobirnavirus            | 6  |
| Picornaviridae                  | Cardiovirus       | Encephalomyocarditis virus       | 12 |
|                                 |                   | Theilovirus                      | 17 |
|                                 | Cosavirus         | Cosavirus A                      | 6  |

|                |               |                          |    |
|----------------|---------------|--------------------------|----|
|                |               | Cosavirus B              | 8  |
|                |               | Cosavirus C              | 2  |
|                |               | Cosavirus D              | 8  |
|                | Enterovirus   | Enterovirus A            | 5  |
|                |               | Enterovirus B            | 8  |
|                |               | Enterovirus C            | 17 |
|                |               | Enterovirus D            | 13 |
|                |               | Enterovirus E            | 16 |
|                |               | Enterovirus G            | 17 |
|                |               | Enterovirus H            | 9  |
|                | Hepatovirus   | Hepatitis A virus        | 8  |
|                | Kobuvirus     | Aichi virus              | 4  |
|                |               | Bovine kobuvirus         | 6  |
|                | Parechovirus  | Human parechovirus       | 14 |
|                |               | Ljungan virus            | 13 |
|                | Salivirus     | Salivirus A              | 10 |
|                | Sapelovirus   | Porcine sapelovirus      | 16 |
|                | Teschovirus   | Porcine teschovirus      | 6  |
| Polyomaviridae | Polyomavirus  | BK polyomavirus          | 8  |
|                |               | JC polyomavirus          | 3  |
| Reoviridae     | Orthoreovirus | Avian orthoreovirus      | 6  |
|                |               | Baboon orthoreovirus     | 8  |
|                |               | Mammalian orthoreovirus  | 25 |
|                |               | Nelson bay orthoreovirus | 8  |
|                |               | Reptilian orthoreovirus  | 13 |
|                | Rotavirus     | Rotavirus A              | 42 |
|                |               | Rotavirus B              | 8  |
|                |               | Rotavirus C              | 10 |

---

<sup>a</sup> clasification based on ICTV 2009 report

Supplementary Table 3 Probes selected for detection

| PROBE_ID                    | SEQUENCE                                                                |
|-----------------------------|-------------------------------------------------------------------------|
| BOVINE_ADENOVIRUS_D_PROBE01 | AAGTATTGGGAGGAATCTGATACAAATTGTTAACAGCTCCCAAATAGTCTGCAAAATTTTGATCATTAGT  |
| BOVINE_ADENOVIRUS_D_PROBE02 | GAGTCAGAGAAGGTGAAGCGCCATTAAGGGATTGAAACAATTCATTATTTAAAGCTTTTCTCTGTACTT   |
| BOVINE_ADENOVIRUS_D_PROBE03 | CTTTAACTCTGTAAAGCTCCAACCTCTAAAAGCGCCCAAGATCTATCCGGAACATTAACAACAACCGT    |
| BOVINE_ADENOVIRUS_D_PROBE04 | TCCATCCTAATGGGTCAAATATGTACATTTTATAATATATAGGATCCCAAGCCATCGCAACCCAATGAAC  |
| BOVINE_ADENOVIRUS_D_PROBE05 | TAATAGTTTTATCAGGTAGCTGTTGGGTACATGAGGCATAAAATGGAGAATCCATCACAATATAGATTC   |
| BOVINE_ADENOVIRUS_D_PROBE06 | TGAAACAAAGCACTGGTGGGAGCAGATAAAGTTCAACCCAGTAGGTGCACTGGAATCCACAAAAAGGCTT  |
| BOVINE_ADENOVIRUS_D_PROBE07 | TTGTGATTGGATCAGTAAATTTAAGCGATAAAATCAAACCTTCACITTTCTAACCCATTTCTGCTTGAAT  |
| BOVINE_ADENOVIRUS_D_PROBE08 | TCCTAGAATTTAAAGCTATGATAGTTGTGGCTGACTGTGAGCCTCCACATTAGAATACTTAGATGTGTTG  |
| BOVINE_ADENOVIRUS_C_PROBE01 | AAAAACCAGAAAATGCTTGTCAITTTATGCCAAGAAAAACGGCCACAACCTAGATCAATAACAATGTG    |
| BOVINE_ADENOVIRUS_C_PROBE02 | AAGCGTGAAGAACATACAACAATATAAACCCATGCTGCACTGTGGGGACTTTGCACACTCTCGTTATT    |
| BOVINE_ADENOVIRUS_C_PROBE03 | CGGAATTTAAAAATAAAGGGGCTTACCATAGTAATAATATTTGATTGTGTTTCTAACACTCCTTGTGT    |
| BOVINE_ADENOVIRUS_C_PROBE04 | TGTAGAGGAAGTTGATTGGCAAAAAGCCATGGATTTAGCGGTACAAATTTTGCAACCTTTAAAGGTTGAT  |
| BOVINE_ADENOVIRUS_C_PROBE05 | CGCTTCTAGTGTTCACCCGTGACACGTAATGTCTCCGGTGTGAGAGTTAAGGAACCGGTTTCATA       |
| BOVINE_ADENOVIRUS_C_PROBE06 | TTCCATGTCGGGCGGCCGCTAATTGTTGAAAAACATTTGATTGACCGGATCCCTAAGCTTTTGGCCTAC   |
| CANINE_ADENOVIRUS_PROBE01   | AGCGCAACAGCCAAAAATAGGACCCACATGGGGGTCAAAGTGTTTTCCACCGCTCAAAGGTGGTCCG     |
| CANINE_ADENOVIRUS_PROBE02   | TTTTCTCTAAGCACAGCAACATGTCGTGAGAAATGCTAGCAGGAGAGGTGGGATGCGGTGGAATAGGTGA  |
| CANINE_ADENOVIRUS_PROBE03   | ATCCCGCCAGTTTCTGGCGGGAATGGAGATTGGCAGGTTAGTAGTGTGGCAGGGATGGGATAAAGCAT    |
| CANINE_ADENOVIRUS_PROBE04   | CATCAAAAAGATCGTGACGGGTAGCGGGCAGGGGGCTGCCATGAGAATACTCACAGTCAAGGCAGTCCG   |
| CANINE_ADENOVIRUS_PROBE05   | GCCACTCTCCAGTAGCTCTAAAACATAATCATGGAGATTGCGCGGGCGCCGGCACAATAGTATATTTT    |
| CANINE_ADENOVIRUS_PROBE06   | TGCCCCAGGGCTTTTCTCCCAAGTAGTGGTGGAGTTAATGTTTCTGTGGACATAAGCTGTCCAACTG     |
| CANINE_ADENOVIRUS_PROBE07   | AGTTGACAAAGGCATGCAAAAACATAACAACAAACAGTCCACAGGCGGCGCTATTGGGACCCTGAATGGT  |
| CANINE_ADENOVIRUS_PROBE08   | GTGAAACCGGCGGAGTGGATAAAGGACTAAACCCAGAATCAGCCTCAGTGCTCGCACTCGAATCAGTGTC  |
| CANINE_ADENOVIRUS_PROBE09   | GAGGGGTTGCCACCAAAGCTCCGCTCTGCACGGCAAGGCCGGCACCTACTTGAGAGAAACAGAATTGTC   |
| CANINE_ADENOVIRUS_PROBE10   | TAAAAGCAGTCTGGCTTTAATTGCAGCGGCGTGGGCGGAAAGTAAGCAGAGTGTTTTTCCAAAACCTT    |
| CANINE_ADENOVIRUS_PROBE11   | CTTCATCATTTCTCCTCAGCTCCAGCCGAAGCGGGTTCTGAACGTACAGGCATAGCAAAAGGCATTC     |
| CANINE_ADENOVIRUS_PROBE12   | GTGGCTTCAAAGACAAATCCAAGGTTCTGTTTGCTCAGGCTCTGGCACGCAAGGGCGTTTGCTGACCCC   |
| CANINE_ADENOVIRUS_PROBE13   | AGCTATCTACAGCCTGGTTCACATGAAAAAGTAGCGGGACCTGTCTGTGAGGGCATCCAGCAGCAGCTG   |
| HUMAN_ADENOVIRUS_A_PROBE01  | AGCGGTTAGCTTGGGGCTGCTGGCGAAAAGCATCAGGACTGCGCGCCGTTAAAGCCATAATACGATCCAT  |
| HUMAN_ADENOVIRUS_A_PROBE02  | CGTCCCTGCTGCTGACTCTCCCAAGATTCTTCTCCAGATTTCTGCGGTTGCTGCTGTTTCTTTGAGCG    |
| HUMAN_ADENOVIRUS_A_PROBE03  | TTGGGAAAAAGGCATGGAAGCCATGGCTATGCTAATGGAAAAGTACCATGTGGATCACGACGAGCGCGCC  |
| HUMAN_ADENOVIRUS_A_PROBE04  | CGCAACTAGGCCCTTCGCCAGAGTCAAGTACATGGCCTTCTTGACCTGTTGTTCCATGTTTACTTCTCC   |
| HUMAN_ADENOVIRUS_A_PROBE05  | GGGTAACGCATCGGTCTTAGTGGCCGCTAGCGCACTACGGCGCAACAGACTTTCGTACTCAAAGTATA    |
| HUMAN_ADENOVIRUS_A_PROBE06  | AGGTAACAAAACGTCGCATAGTTTGATCAGACACCCCAACCATATTATGCTTTAAAATAGCCATTCC     |
| HUMAN_ADENOVIRUS_A_PROBE07  | GACCGGCAGTGTTAACAATAGCACATGATAAGCGGTGCGGAGACACAAAACCCGAAAACGTTTGTCAA    |
| HUMAN_ADENOVIRUS_A_PROBE08  | GGCTTTGCATGGCCGCCAAAACCGCGGGATCCAGGTTAGGAGCCCTCTCCGCGATGATCGCCGGTCTGCTG |
| HUMAN_ADENOVIRUS_A_PROBE09  | GAGCCCGCATGAGCAGTAGCCCGACGCGCTGCTTGCATTCTTACCAAGTTTGCGGCGCTGGTTTC       |
| HUMAN_ADENOVIRUS_A_PROBE10  | GCACTCACAGAGGGAGCGCACCCAGACCGCAGCGCTCAGCCGCGCCGCCAAAATGGGCAGATACTTT     |
| HUMAN_ADENOVIRUS_A_PROBE11  | AAACTAGGGGCTGGCTTGCCGGATTGCGAACAACAACAACATTTCTTTTCTTTCTGCTGCTGTTTGTAGC  |
| HUMAN_ADENOVIRUS_A_PROBE12  | ACTTTCCGGAGAAAGAATTATTTCCCGACGCAACATCATGAAAACAGCAGCGGGCATCGTCTTTTAAAT   |
| HUMAN_ADENOVIRUS_A_PROBE13  | TACTCAAATGTGGGCTTATACCTACCAGCACTATAAATACTCCAGGAAACATAAAAACCTGCTGATA     |
| HUMAN_ADENOVIRUS_A_PROBE14  | ACCACCGAAAACGAGGGTTGCGCTACAGATCCATGTTGCTAGGCAATGGGAGATTTGTTCTTTTACAT    |

HUMAN\_ADENOVIRUS\_A\_PROBE15  
HUMAN\_ADENOVIRUS\_A\_PROBE16  
HUMAN\_ADENOVIRUS\_A\_PROBE17  
HUMAN\_ADENOVIRUS\_A\_PROBE18  
HUMAN\_ADENOVIRUS\_B\_PROBE01  
HUMAN\_ADENOVIRUS\_B\_PROBE02  
HUMAN\_ADENOVIRUS\_B\_PROBE03  
HUMAN\_ADENOVIRUS\_B\_PROBE04  
HUMAN\_ADENOVIRUS\_B\_PROBE05  
HUMAN\_ADENOVIRUS\_B\_PROBE06  
HUMAN\_ADENOVIRUS\_B\_PROBE07  
HUMAN\_ADENOVIRUS\_B\_PROBE08  
HUMAN\_ADENOVIRUS\_B\_PROBE09  
HUMAN\_ADENOVIRUS\_B\_PROBE10  
HUMAN\_ADENOVIRUS\_C\_PROBE01  
HUMAN\_ADENOVIRUS\_C\_PROBE02  
HUMAN\_ADENOVIRUS\_C\_PROBE03  
HUMAN\_ADENOVIRUS\_C\_PROBE04  
HUMAN\_ADENOVIRUS\_C\_PROBE05  
HUMAN\_ADENOVIRUS\_C\_PROBE06  
HUMAN\_ADENOVIRUS\_C\_PROBE07  
HUMAN\_ADENOVIRUS\_C\_PROBE08  
HUMAN\_ADENOVIRUS\_C\_PROBE09  
HUMAN\_ADENOVIRUS\_C\_PROBE10  
HUMAN\_ADENOVIRUS\_C\_PROBE11  
HUMAN\_ADENOVIRUS\_C\_PROBE12  
HUMAN\_ADENOVIRUS\_C\_PROBE13  
HUMAN\_ADENOVIRUS\_E\_PROBE01  
HUMAN\_ADENOVIRUS\_E\_PROBE02  
HUMAN\_ADENOVIRUS\_E\_PROBE03  
HUMAN\_ADENOVIRUS\_E\_PROBE04  
HUMAN\_ADENOVIRUS\_E\_PROBE05  
HUMAN\_ADENOVIRUS\_E\_PROBE06  
HUMAN\_ADENOVIRUS\_E\_PROBE07  
HUMAN\_ADENOVIRUS\_F\_PROBE01  
HUMAN\_ADENOVIRUS\_F\_PROBE02  
HUMAN\_ADENOVIRUS\_F\_PROBE03  
HUMAN\_ADENOVIRUS\_F\_PROBE04  
HUMAN\_ADENOVIRUS\_F\_PROBE05  
HUMAN\_ADENOVIRUS\_F\_PROBE06  
HUMAN\_ADENOVIRUS\_F\_PROBE07  
HUMAN\_ADENOVIRUS\_F\_PROBE08  
HUMAN\_ADENOVIRUS\_F\_PROBE09  
HUMAN\_ADENOVIRUS\_F\_PROBE10

TGGGAAATGATCTTCGGGTGGACGGAGCCAGCGTTCGCTTTGACAACATTGCCCTGTATGCTAACTTTT  
ACAGCTGTGGAAAGCATCACACAGAAAAAGTTTCTATGCGATCGTGTTATGTGGCGCATCCCATTTTCTA  
GGACCGCGGAATACCACTGAAGGATAGACCCCTTAAATCTGTATACGGAGACACTGACAGTCTTTTTGTG  
GGTCAGTTGAATGTGAAACTGTTTGTAGTTATTGTGGCGCAGATGCTTATTCTCCAGAATCTGTTTTTT  
GGTAATATCCGGCCCTCTGGATGTAGATGCCTATGAGAACAGTAAGAAAGAACAAAAAGCCAAAATAG  
ATGCTGGTCATGAAACTCTCAGGAGAAGAGCGTCTCGTCAACATGGCCACGATCTAGCCATTAACACTCA  
CTCTCAGGAGAAGAGCGTCTCGTCAACATGGCCACGATCTAGCCATTAACACTCAAGTGGGATCGATGGC  
TAAGCTACCTCACGTGAGAGGCAGCGCCGCTTTCATAGAATTATACATCGTAGGACACAACATCAACGGT  
CCTCGTAACGACCTGCGGGTAGATGGCGCCAGCATCAGTTTACGAGCATCAACCTCTATGCTACTTTT  
GACCTGCGGGTAGATGGCGCCAGCATCAGTTTACGAGCATCAACCTCTATGCTACTTTTTCCCATGG  
ATAGAAGCTATAATGTGTTGGAAGACAAAATCAACACAGCCTATCGCAGTTGGTATCTTTCGTACAATTA  
CTCCACTAGACAAGTCAGTAACACTACCCTGTGGTGGGTGCAGAGCTTATGCCCGTCTTCTCAAAGAGCTTC  
TATGCCGTCTTCTCAAAGAGCTTCTACAACGAAACAGCTGTGTACTCCAGCAGCTCCGCAAGTCCAC  
AATGCCATCATAGATAAATTACTTGAAGTGGGTAGACAGAATGGAGTGCCTTGAAGTGACATTGGTGTTA  
GATGCATGGCCAGAAAATCCAGCAGGTACCCCGCTCAGATGGGTTTCTCGCTCCATTTATCCTTTAT  
CCGCTCCTCGTTGGGATCTTCGGGGGCCGTACGTCTAAATCATAACAGTTCGTGAAGGGTAGGTGGTTC  
GTGCAGTAGGGGCGGCCCTGGTTCCAGTGGTGTCCCATCTACGGTGGGTGCGCGAACAGGAGTGC  
GCGCCGGCGAAAAGTGAATAAGTCAATCCCTTCTGCACCGCAACATTACAGACTCGGGAAAAATCTG  
CCCGCCGCTGGGCGCGGTTGCGTGCAGCAGTTCACCTCGTTCGTAAGTTTCATCATCATCATCTTT  
ACCTCCAAAACCAAGAGTACTGTTAGAGTCTGTTCCAGCAAGTTACGCACAGCAGAAAAATCTTCAA  
TAGCTCCAAAGGGCGCTCCTAAGCTCTGAGTGGGAACAAACCGAAGATAGCGGCCGGCGATGGCCGA  
GAAACCCAGACACACATCTGTCTTACAAACCTGAAAAGGTGATGAAAATTCTAAAGCTATGTTGGGTC  
TAACTCCCCTCGAGCAGCCAGACGGTCAAGGACAAGCAGCCGAAGTAGAAGACCACCAGCCAAACCCGCC  
CAGTTTAGGACCTTTCGCGACCACCTGCAATGCTAATGGCCGTGACCTGTGGAGCTCATTCTGCTGCTT  
ACTTTTCAACGATGTCACCTTCGCCCTGCCAAACCCGCGTTCAAAAAGCGCACGGACTTTTTGCTCTGG  
CCTTTCTCGAGAGTTTTCCGATCCGGTTCGATGCGGACTCGCTCAGGTCCCTCGGTGGCGGAGTACCTAC  
CCGCCAACCCATAACCGGGACATGACGGGCGGCGTCTTCAACTGCGCCCCGCGAGAACGGCCGCGCCG  
TGGAATCAACATCCAAGCCAACCTGTGGAGGAACTTCTCTATGCCAATGTTGCCCTTATTTGCCTGA  
CTATGCCAATGTTGCCCTCTATTTGCCTGATAAATACAAATACACACCGGCCAACATCACCTGCCACC  
GGAGAAGTCGGTGGCTTATGGGGTCTTGAAACGACGGGGCAGCCACGCCCTCGTTAGCCGCGGAATTC  
GTCAGCAGTTCGGCCAGTACCGGATCGTCTGCAAACCGCCCTGGCCGTGGATCTCTGGACTTCTTCT  
TGGCCGTGCGCGAATGGCAAGCTTCTGACGATCTGGGCACCTGCATAAGCTACTTCGACCCCGACCT  
TCGTGCTGACCTGGCGCTCGTCCAGCCGACGCGCGGGTTTGGGCTCACGCGTATGCACGGCCGCGCGGG  
GCCGGCGACGCAGGCCCTTCCCGCCACCACCGCTGAGGAGGAAGTAGAAGAGATGTTAGTGGATGA  
AACACAAAGCACACATAGCTTTCAGGATTGCCACTAGTCCCGATGGAAATCACAAGCCCGACAACCTCG  
ATTCCACCCCACTACAGGGTAGTTGCTGACTTGCCTGGACGGTGCAGAACGTTACTGGATCTTGATCAT  
CGTGCAGGTCTTCAAAGGCCAGTGGCAAGCGATATGTAAGACGCTTGGAGCCAAAGGTGTGCCTCCC  
GAGGAGAAACAGTGGGAACGGTGGCCGAAAGTAACCCATTTGTAAAGTTATGTTGCTGCCAAGTTTTAA  
GGCGCTCGTCCGAAAAGCCAAATGGGTGCAAGAGGTAGCAGGTACGTTCTTTGGGTTCCAGGCCAGGGC  
TGGATGATTCAAAGGCACAGTTGAGTAAATTTCCCTGATTGTCAAAGGGAAAGTTTTACAGATAAAGCGTT  
TGTGACGCAGGGTGGGTACAACCTGGGGGCTTTGAAGCATGCTGTTTGAACGCCGGTAAGAGGTCCAT  
CAGAAGTTTCAGGGAATCAAACACATATTCACTCCAGCAACCCCTGGAACATGTCCAGTTCCTCC  
AAACCCGGTGGTGTGATAGAGCCAGCTCCGAGTAACGTATGCTGTTCCGCCCTCCGATAGGCC  
GGAGTCGTACGGGGGTAATAAACAATGAATGGGAGCCCACTGTTGCGCGATTTGGCTTACGGCTGC

HUMAN\_ADENOVIRUS\_F\_PROBE11  
HUMAN\_ADENOVIRUS\_F\_PROBE12  
HUMAN\_ADENOVIRUS\_F\_PROBE13  
HUMAN\_ADENOVIRUS\_F\_PROBE14  
HUMAN\_ADENOVIRUS\_F\_PROBE15  
HUMAN\_ADENOVIRUS\_F\_PROBE16  
HUMAN\_ADENOVIRUS\_F\_PROBE17  
HUMAN\_ADENOVIRUS\_G\_PROBE01  
HUMAN\_ADENOVIRUS\_G\_PROBE02  
HUMAN\_ADENOVIRUS\_G\_PROBE03  
HUMAN\_ADENOVIRUS\_G\_PROBE04  
HUMAN\_ADENOVIRUS\_G\_PROBE05  
HUMAN\_ADENOVIRUS\_G\_PROBE06  
HUMAN\_ADENOVIRUS\_G\_PROBE07\*  
HUMAN\_ADENOVIRUS\_G\_PROBE08  
HUMAN\_ADENOVIRUS\_G\_PROBE09  
HUMAN\_ADENOVIRUS\_G\_PROBE10  
HUMAN\_ADENOVIRUS\_G\_PROBE11  
HUMAN\_ADENOVIRUS\_G\_PROBE12  
HUMAN\_ADENOVIRUS\_G\_PROBE13  
HUMAN\_ADENOVIRUS\_G\_PROBE14  
HUMAN\_ADENOVIRUS\_G\_PROBE15  
HUMAN\_ADENOVIRUS\_G\_PROBE16  
OVINE\_ADENOVIRUS\_A\_PROBE01  
OVINE\_ADENOVIRUS\_A\_PROBE02  
OVINE\_ADENOVIRUS\_A\_PROBE03  
OVINE\_ADENOVIRUS\_A\_PROBE04  
OVINE\_ADENOVIRUS\_A\_PROBE05  
OVINE\_ADENOVIRUS\_A\_PROBE06  
OVINE\_ADENOVIRUS\_A\_PROBE07  
OVINE\_ADENOVIRUS\_A\_PROBE08  
PORCINE\_ADENOVIRUS\_A\_PROBE01  
PORCINE\_ADENOVIRUS\_A\_PROBE02  
PORCINE\_ADENOVIRUS\_A\_PROBE03  
PORCINE\_ADENOVIRUS\_A\_PROBE04  
PORCINE\_ADENOVIRUS\_A\_PROBE05  
PORCINE\_ADENOVIRUS\_A\_PROBE06  
PORCINE\_ADENOVIRUS\_A\_PROBE07  
PORCINE\_ADENOVIRUS\_A\_PROBE08  
PORCINE\_ADENOVIRUS\_B\_PROBE01  
PORCINE\_ADENOVIRUS\_B\_PROBE02  
PORCINE\_ADENOVIRUS\_B\_PROBE03  
PORCINE\_ADENOVIRUS\_B\_PROBE04  
PORCINE\_ADENOVIRUS\_B\_PROBE05

ACATGAACGGTCGGGTTGCCGTCCCCAGCGCCCTGGATACATACGTGAACATTGGGGCGCGGTGGTCTCC  
TCCAAAGCAGTCTCGGTAACGACCTCAGGGTCGATGGAGCCAGCGTCAGGTTTACAGCATTAACTGTGTA  
AGAAACCCCTCTTTGGGGTCCGGGTTTGTATCCATATTTACCTACTCTGGCTCCGTCACATACTTGGAT  
CAACAAAAAGACTCCCTCCGTATCTGGAGATCCAGGGACCGCGGCTAGGTCTCGGCGGGGTTCCGTCG  
GGCGGTCTGTCTCCAGGCTACGGAGGAAAGTCCGTGACCGCTCTCTGTTTTTTCATCTAGAGCGTACAA  
ACTCCCCTCCGTATCTGGAGATCCAGGGACCGCGGCTAGGTCTCGGCGGGGTTCCGTCGTTGACGCACG  
GGCGGTCTGTCTCCAGGCTACGGAGGAAAGTCCGTGACCGCTCTCTGTTTTTTCATCTAGAGCGTACAA  
TTAGCCCTCTTCCAAGTGAAGGGCTAGTTTTCTCTCCATGTCAAATACAGGGGTTAGCTATTTCGAG  
CGAAGGCGAGCCAGTGGACCCCCCGGTTTCCCGTCCGGCCGTGTTAACGATGGCACAGGCCGGCTTGTG  
GGCGTTTCATGGATAGTCCAAAGGTTCCGTCTGTTCTTCTGTAGCAAGTCTTCCAATTTTCAACTGC  
TCCTCCACATCACCCGGTACAGAGGAACTTTTCTGCGTCAGGCTGGGTACGGCGGTGGCCCCAATCAG  
CGTCTCGTTGGGATCTTGGGTGGATCCACTCCACATCGAAAAGATCATGAAGCGACGGAGGGCGAAGT  
CTTTGTAATTCGCGGCACGTAGAAACCTGTTAGCCGATGTTGTAATGGCTGAGCATGAATTAGGAA  
TGAAAGGAACGGCTGGAGTGGTTGTGGTGTATAAGGGTAGACGGGGTTGAAGTCTTCACTCACTCGGGT  
GCTGCCGGTGGCGGCGAAAATAGGCAGAGTGTTCGCCAGAAAGCGATACAGGTGTTCTGTTACGGCG  
TGCTCGCGCTCGGGGCTCATCTCCGCAAGTAGGGGTAATGGAGCTGCCTGTTGGTTCTGACGGTTGG  
ACCGCAGTTGACGTCTCCGCGCAGCAGCGGGCGTCTTCTGTTCTTACGTGAACCACGTTGCGGCCCAA  
CGTTGTCTACGTGGAATTTCTCCATTAACATCATCATGGTTTCCATACCTTCTCCACGCTGTCAACAG  
TCCTGACAACATCACACTCCCAGAGAACAAAAACCTATCAGTATATGAACGGTCGCGTGACGCCACCC  
GGCCAACATCCCCTATCCCCTGATTGGGGCCACCGCCGTGCCAGCCTCACGCAGAAAAAATCTCTCTGC  
ACTTCATGCCCGCGCCGGGAAAATCCTTTAACGACGTACATTGCGCCCTCCCAATCCAGGCAGAA  
CTTGCTAGATCCCCTGCCTCCGTTCTGCTCCAGAAAAGGGGGCGATTGTGTTGGACCAACGAGCCCCTC  
AGCTACGACCTCATGCTTCTGTTGCTATCTGGCCGACTCACAGGGAGACGACGCCCGCTTACGACCAGCA  
GAAGCTTCTGCAGGGACAGCAGCATCTTGTAGCTTGTAGCATACTGGTCCACACACAGCGTCTAAAATAAA  
GAATAATTTTATTAGCTGGCCCCGACGCTACTTTCTTGGCGGGGGTAGAGCTGATATCCATCTGCTCAGT  
ACGCGTTTTGTCTCATATAACACAGAGAACACAAAGTGTCTTCAATTTTTCGTAGCTCTCCGATGATAATC  
TGTCAAAAGTTCCAAAAAGTAAGGACTTATGCCTAAGTCGCGAACAAATAGCTCGCAACTTCTCTCCCT  
ATTGATTTTTTGAACACTCAGGTCCAAAGGTGCATCAAGGCGTTGTTTTTAAACAAGGGCAAAGTCTC  
TTTTAGCGTTTGGAAACCAAGCTAGGGCAAGCCAGTGTGCCCCACCGGTCTCGCGGGCCGCTGATTGAC  
ACTGTTTTATCTAACAGTCTACAATGTAAGCAAGCAATGATAAACTAGCAGTCTCCTGGAGTTGA  
TGCGCTTGGCTGGCGCTGCGACAAACCGCCAGTGTCTTGTCTGCGTCGAGCCACGCGCCTTCTCGTTT  
ATGTCTGATTAATGTATACAAATGATGTTAGGGAAGAACCAGGAGGTGTTGCGTGGATAAATAAAGGTGCT  
AGCCCCGGAAGGACTTGTCAAAGGTGCCAGGAAGCGGGCAGCTGGAGGTGCGCGCCATGGCTCGGAG  
TATCCTCCTCATTACTGTCCCCTCTTCTGGGGGTCATCTCAAAGACCCCTGAGAGCCACTGAGTC  
TGACGTCTTGGCGAAGGACCACTCGTAGGTGATGTTGCGCCCGCAGGAGCAGGCTTTGAGGGC  
AGCGATGGTAATCACAAAGAGCGGAGTTACACACAGGTACCTCGGGGACAGTCCAAACAAACGGAGAGGG  
TGGGAAAGAAGCTGGCGTAGAGGTTGACGCTCTCGATGTTGATTTTGGCCCCGTCGCGCGGAGGTGCTT  
TCCACAGCGTGTAGGGTTTGAAGTTGGAGCCAAGGTGAGGGCGCCATTGTCCACAGAAAAGTCGTTAGA  
AGAGCCGCTCGTTGTCCACGCCCTCCACCAGGTCCATGACGGGATTGTAGCCATGGGGCTGTGCGGGTA  
AGCACAGATGCTGTTGATAGCATTGCTGAGACACTCAGGACGCGAGCAATTACACGTGACACTGCCAGG  
TGTTCCAGGTGGGTTTGCAACAATGGCCAAACATGTGTACATATTTGATTTGGTCCAGTTCCTTCAGCC  
GGGTTAAAGTCGGAGCGGACCGGACCGCTCATCTTTTTGGGTAGAATGAAGCTTCGCTACGGTGGGAAT  
AAATCCACAGAGGCTTCCCCTACAGTGTATCTGTTGTTGTTGTTGTTGTTGTTGTTGTTGTTGTTGTTGTT  
TAGGCGTTTACAGAAACTGGCATACTCCATAATCTGACCTACACCAGTTTGGACAACGGGGACTGGGTG

PORCINE\_ADENOVIRUS\_B\_PROBE06  
PORCINE\_ADENOVIRUS\_B\_PROBE07  
PORCINE\_ADENOVIRUS\_B\_PROBE08  
PORCINE\_ADENOVIRUS\_C\_PROBE01  
PORCINE\_ADENOVIRUS\_C\_PROBE02  
PORCINE\_ADENOVIRUS\_C\_PROBE03  
PORCINE\_ADENOVIRUS\_C\_PROBE04  
PORCINE\_ADENOVIRUS\_C\_PROBE05  
PORCINE\_ADENOVIRUS\_C\_PROBE06  
PORCINE\_ADENOVIRUS\_C\_PROBE07  
PORCINE\_ADENOVIRUS\_C\_PROBE08  
PORCINE\_ADENOVIRUS\_C\_PROBE09  
HUMAN\_HERPEVIRUS\_1\_PROBE01  
HUMAN\_HERPEVIRUS\_1\_PROBE02  
HUMAN\_HERPEVIRUS\_1\_PROBE03  
HUMAN\_HERPEVIRUS\_1\_PROBE04  
HUMAN\_HERPEVIRUS\_1\_PROBE05  
HUMAN\_HERPEVIRUS\_1\_PROBE06  
HUMAN\_HERPEVIRUS\_1\_PROBE07  
HUMAN\_HERPEVIRUS\_1\_PROBE08  
HUMAN\_HERPEVIRUS\_2\_PROBE01  
HUMAN\_HERPEVIRUS\_2\_PROBE02  
HUMAN\_HERPEVIRUS\_2\_PROBE03  
HUMAN\_HERPEVIRUS\_2\_PROBE04  
HUMAN\_HERPEVIRUS\_2\_PROBE05  
HUMAN\_HERPEVIRUS\_2\_PROBE06  
HUMAN\_HERPEVIRUS\_2\_PROBE07  
HUMAN\_HERPEVIRUS\_3\_PROBE01  
HUMAN\_HERPEVIRUS\_3\_PROBE02  
HUMAN\_HERPEVIRUS\_3\_PROBE03  
HUMAN\_HERPEVIRUS\_3\_PROBE04  
HUMAN\_HERPEVIRUS\_3\_PROBE05  
HUMAN\_HERPEVIRUS\_3\_PROBE06  
HUMAN\_HERPEVIRUS\_3\_PROBE07  
PHOCID\_HERPEVIRUS\_1\_PROBE01  
PHOCID\_HERPEVIRUS\_1\_PROBE02  
PHOCID\_HERPEVIRUS\_1\_PROBE03  
PHOCID\_HERPEVIRUS\_1\_PROBE04  
PHOCID\_HERPEVIRUS\_1\_PROBE05  
PHOCID\_HERPEVIRUS\_1\_PROBE06  
PHOCID\_HERPEVIRUS\_1\_PROBE07  
PHOCID\_HERPEVIRUS\_1\_PROBE08  
PHOCID\_HERPEVIRUS\_1\_PROBE09

GGGACCCCTGGACACAGAAGAATTTTGCAGACTTTTCAGGTAAGGTGATGTTTTATTAGTTTACCT  
AGAGGGTTTGCAATGTTCAAGCTTAGAACACCGCTGGGACCCTCGTGAAGCCATAGTTGTCATAGAAAG  
TGATAGTCATAGGGGTACACCGGGTTAAAGTCGGACGGGACGGACCGCTTCATCTTTTTGGGTAGAATG  
CTAGTTCTCCGTTTTGGTTGATGCTAACACCACCACCAATTTTCAGTGTGATGCCCCAGTGTGGAAAA  
ATTTCTGAGGAACCTGGATGTGAACTGGCAGTATCTGCCGTTCCCCAGAAGCTGGGACCTGTAGCGCAG  
CTGGGAACCTTGAACCACCTGTACTGTAAAATGGAGGAATTATGTTAAGTGGTGGGTTCCCGTATGG  
CCGCCCCACAGTACATCCGTGCTCACGAGGAGCGTGGTGTACGTATACCCGTGTCCGCCCGTAGTT  
TGGTTACAGTAGAACAGAAATTTGATGCGCAACGGTGTGCATCGTGTATGATGTAAGAAACTTAT  
AATTCTCCACATCTAACAGGGCCGGGATTTGCCCCCCACGAGATCCTCGTAGGTGATGATGAAGCCTTC  
CCACCAAGGTGTCATTGTTAGGTTTTAAACCACCGTGGAGGAGAAGATAATCCTCAGTTGGTTGCTAGA  
GCTGGTGTACACGCACAAGATCAAACACTTCAAACAGAATGTAGAGCAGAGTAGGCTCCTCCATCGCATC  
GCATCCACAGGTGACATGGTTGGTAGAGTGCAGAACTCGATGCGACAAGTGCGGGGAGGATGCTTACAGC  
TGATGAACGACTACATTTCCCGAATGGAATGCTTGGCCAAAGAGTACGTGCAGTGAACATCGCA  
GCGCTTGCCGATTTTTGCCAAAATCGCCCCGACGGGCTGCGTGCAGAAAGGCTGCTGCCAGTGTGTG  
CCTACAGCTAGTCCCGTTTCGCGGTACCCTGCAGCAAAGCCTGTCGTGTCTGCGCTTAAAGCACGGCCGG  
TGGATGAAATGAACCAGACCCTATTGTTTCTGGGGCCCCGACGACCCCCCAACGGGGGCTGGCGCA  
GGCCCCAAGAACGCAGACAAGGCCGCCGCCCGGGCGATCCAAGGGGCTGTCCGGGCGTGTCCGGGCGC  
ACCGCGATGTTTTCCGGTGGCGGGCGGCCCGCTGTCCCCGGAGGAAAGTCGGCGGCCAGGGCGGCGTCCG  
CCCAGTCGGGACGCAACAGAAGCCGACCGGGCCAAACCAGCGCCATACGTACTATAGCGAATGCGATGAA  
CTACGAGACGCGCCCCGCTGTTTTACCAGCTCTACGTCGGAAGCGGGCGTGTGCTGCTACCTGTGC  
TATTGCCGTCATAGCGCGGGTTCCTCCGGTATTGTCCTTCCGTGTTTTAGTTAGCCTCCCCATCTC  
GTCGTCCAGGGTGGGGCTGATCTGAATTTCCCGCAGAACCTCGACCAGTAGGTCTGTTGTGTTTGTGGG  
ACACGTGCACCACCTGTGCCGCTCCGGCAGCGCGCTCGTTAGCGACGCCCTGGGGTGTGATGAGGCTGTA  
ACCTCCCCGAGTCCCACCTCAGCGATCTCGCTCCAGGGGCTGCCGGCCCCGCTGCTCCTGGAGTTTGA  
ACGGGGACGAGGACGGGGACGAGCGCGAGGAGTTCGCGCGGAGACCGGGGGCCGGCACGTTGGGTACCA  
CCGCTCCTCTGCGAGCTATCCGTTCAACGCCAGACCCTGGTGCAGCTGTTGAGGGCGGATCCGGTCAAC  
CTGATTTTCATCCTGCGGCGGGGCTCGGCCCCAAAAACGCGGAACCAGCGGCCCCCAAGGGGCGCTCCA  
ACGTGCGATGCAAATTAATAATCGTGCACAGAGCCGATCCGGCCTCGGGTCTGCTTGCCTCCCCCGGCC  
CCACAATCCAATCCGATTCAACGACAGCTGGGCTTCCGGTTAACGCCCGTGTTCCTGCGGATTTAGTG  
TTACAATAAAGGAGAGGGCCATAACGGCGAGACCTCGGAAGCGCTAAATAACATCCTTACGGATGACAC  
GAGCGTCTTCTGAATCGTACTTTGTCGGACAAATCAAAGTACACCATCATGATGCTATTGGGGGGGTAA  
GGATTTAGTTGGCGTGCCATGGCGAAGTACAGGCGCGGAGATTTAAAGGAGCGTCTTTCAGGACTCCTA  
CCGGGGTGTCCGTCATCTTTGCGTATTTAGGCCCGGAACTCAATCCGAAGGGTGAAGACAGAGACTA  
ATCGGATAAACACAGAATCCGATCTCCATATATAACCTTTACCTCGTACGCTTTTTGGGAGAGAACGCT  
CCGCTACGTATAAACATGGCAGAAATCCCTGCGCAACTCCAGTAAAACCGTACACGGAATTACAACTAC  
AGTTTTGGAACCTGGTCCCCAACITGTAGTCTGGTATCCAAATCAATAGGATAATAACCCTCAATTTG  
GACATAAAAACAGCGGCTGCGTGATTAATAGGATCCACATATGCGGTTTTGGGACAATCCACATCCACTGC  
TTTAGACATTCTACCATCCCTATAATCAAACCTCGCGTAACCAACGGTCTGTCTAAAATTAACCTATCT  
TCCCAATTTTTGTATACGTATCATTGTCGTATGCCATCCACGAGAACCAGGTTGATTAATTTTTGAGGG  
CATTTGTACAAGTTCCAAGACTACCCGGAATGGCCGGGAGTACTTTAATTTGAGTAGTAATTTAAAAAT  
TTGATATAGTTTCCCAAGAGCTTGAGATATTGCATCCAAATATAATGGTAACTGTTGTATCAAGTCTAT  
GTTCTGTATGAGTCCATCACGTAACCAAAAAATGGAGACATATGAATTATCTCCAGTTGAACTGCC  
AGGAATCATATGATACAGATCTGCGCAACTTCTTGCACAATCAATTTACAGATGTTCCCGTACG  
GTAACACAGAGACACATTCGAACGCTGAGTAAGGCCTATTACCAATATAAAGGCGGCTGCATGACTG

PHOCID\_HERPESVIRUS\_1\_PROBE10  
PHOCID\_HERPESVIRUS\_1\_PROBE11  
PHOCID\_HERPESVIRUS\_1\_PROBE12  
ALPHATORQUEVIRUS\_PROBE01  
ALPHATORQUEVIRUS\_PROBE02  
ALPHATORQUEVIRUS\_PROBE03  
ALPHATORQUEVIRUS\_PROBE04  
ALPHATORQUEVIRUS\_PROBE05  
ALPHATORQUEVIRUS\_PROBE06  
ALPHATORQUEVIRUS\_PROBE07  
ALPHATORQUEVIRUS\_PROBE08  
ALPHATORQUEVIRUS\_PROBE09  
ALPHATORQUEVIRUS\_PROBE10  
ALPHATORQUEVIRUS\_PROBE11  
ALPHATORQUEVIRUS\_PROBE12  
ALPHATORQUEVIRUS\_PROBE13  
ALPHATORQUEVIRUS\_PROBE14  
ALPHATORQUEVIRUS\_PROBE15  
ALPHATORQUEVIRUS\_PROBE16  
ALPHATORQUEVIRUS\_PROBE17  
ALPHATORQUEVIRUS\_PROBE18  
ALPHATORQUEVIRUS\_PROBE19\*  
ALPHATORQUEVIRUS\_PROBE20\*  
ALPHATORQUEVIRUS\_PROBE21  
BETATORQUEVIRUS\_PROBE01  
BETATORQUEVIRUS\_PROBE02  
BETATORQUEVIRUS\_PROBE03  
BETATORQUEVIRUS\_PROBE04  
BETATORQUEVIRUS\_PROBE05  
BETATORQUEVIRUS\_PROBE06  
BETATORQUEVIRUS\_PROBE07  
BETATORQUEVIRUS\_PROBE08  
BETATORQUEVIRUS\_PROBE09  
BETATORQUEVIRUS\_PROBE10  
BETATORQUEVIRUS\_PROBE11  
BETATORQUEVIRUS\_PROBE12  
BETATORQUEVIRUS\_PROBE13  
BETATORQUEVIRUS\_PROBE14  
BETATORQUEVIRUS\_PROBE15  
BETATORQUEVIRUS\_PROBE16\*  
BETATORQUEVIRUS\_PROBE17  
BETATORQUEVIRUS\_PROBE18  
BETATORQUEVIRUS\_PROBE19  
BETATORQUEVIRUS\_PROBE20

CTTCATCTTTATCAAATGCAGTAAACTCGTAATTATTGCGAATATAATCAGCCTTTGAGAGGCACATACC  
CTGTAATTTCTTGAACCTTTATAGGTAAGTCTATCAGTATGCATGTTAGTACTACGGCATAACGAGCTTCC  
TACGTTTCGTAGCGTCCGCCGGAAGGTGCATGAAATTGATTTTTGGGTAACCTGTCAATATTATATAAATA  
GTTGTTGGAACACAGCATGGGCCTCCATCGGCATTGCCAGTATACTGGGACTTGGCCACTTCTCTGAGGG  
CCCGTCTGTAGGTACGTCTGCGAGTTCTGCGGCGCCTCCTTACCCTTGGTTTGCCTTCTTCCAAGGCC  
GCCATGCTAGTTCTCTAGAAGGGTTCGCGGGGGCTGAAGGGAGTGCCGGGAGGCGCGGAGCCGCCGGCG  
AGCCTGCTGTTTCATGGTCCACATTGGGTCCTAGTTGAGTCTCTACATAGTCAGTGTATCCAAAGCATAT  
CGCCACCTTCTCCACCGGCGCCTCGGCCTCCAGCCCCACCTTCTGAACCAGTAGGCCATGCTAGTTCTCT  
CCTGGATGTTTCGCTGGAGCTGGAGCTGTACTGTGCGGCTTTGGAGGACTTCGACTTCTTCTCTTCTTG  
GGATCCCGGCATTAATAGTAGGTGTGGTGAAGCTCATGGCAGGTGCCTTCGGTGGAGCTCGCACAGCTTG  
ACTGTCTTCTTCTAAATGTAGTCTTTTTGGGCTCTGTATGTGGGAAAGCCGAAGTTACTGTGCATATGG  
TGGGTGTTGTTGTAAGTGTGGCCATACTTTTTGCTAACTGGATTATAACTTCATAGTTAAAGTT  
TAATGCTACCTCCAGAATATGAATACCACACAGGCTGGTTTTCCACAGTATTATAGGCCCAAACAGA  
ACCGTTCGAGCTCCAAGACCAAGAGAACAAGCAGAAGAAGACTCGCGTTCGGAGGCGCTCTCGCTCACC  
GCGCGTGTGAGAGGCTGCCAGCCTCCCGCTCTGAGAACCACCGGCGCCATGGCCTGGCGCTGGTG  
GAAAGTAGTACTGACTCAATGGAACCCAGCACTGTGACGCTGCAATATCAGGGGCATAATACCCCT  
GGAAAGTGCCACTGCAAGCTCTGCCAGTACCACCGCTAAACGGACTAGCATGAGCTGGGTACAACCGGT  
AGCTGGCTCACCTTCTAAAGGCAGAAAATATGTAAGGTTAAAATACCTCCACCTAAGTTATTTGAAG  
AGTTTATACTGTCCGGCCGAGGTGCGTGGAGGAGCGACAGTAACGACCCAGACCAGCCCTGGGCGGGT  
GTCCGCGCCAGGTGCGTGGAGGAGCGACAGTAACGACCCAGACCAGCCCTGGGCGGTGCCGGAGGTG  
GCCGAGGTGCGTGGAGGACGAGTAACGACCCAGACCAGCCCTGGGCGGGTCCCGGAGGTGATTT  
CCGCAGTCAAGGGGCAATTCGGGCAGGGCTGGCCGGGCATCTGGGCAAGTGTCTGAAAGCGTGCCTGTG  
GTCAAGGGGCAATTCGGGCAGGGCTGGCCGGGCATCTGGGCAAGTGTCTGAAAGCGTGCCTGTCCCCCA  
GCTTCGCTCGCCTCCGCTCCCTCGGATCCGGTGTGCTGAACTTTATTAACAAACTCCGAGTCGCC  
CCCCGACGGCTTTGGAGAAGGAGATTTAGACGCCCTTTTACAGAAGATTTTGGAGAAGAAAATACAGGG  
ATATTCCATCAAAATCAACACTTAGACAAAAAAACTACAATGGATGAATTTAATTGTTACGGCCACGA  
CTACAATGGATGAATTTAATTGTTACGGCCACGACATCTTTGTGACTGCTGCAAACCACTTGAATGCA  
TTAACCAAGAACCAGACCTAAAATTCAACACAGAAGAAAAAAATCTACTTAAAAAATGCCTTTTACAAA  
CCCAAGTTATGCTTATGAACAATAGAACAAGAATAATGCCTTGTAAGATATAATAGAAAACAAAAA  
TTCAAAGGAATCTAACGTTCCACTTATGCAAGTAATGGCTACAACCTGCTGTTAGACCGCATGTA  
CTAACGGTTTTATGGAAAGATATATGAAAGACAATGGAACATCACCATACTCCCATTAACAGGACAAAT  
GACAATGCATATTATTAGGAACAGTAACAGACTATACAACAGGAACCCAACTTTCATCCATAAACTTACA  
TTGGAGAAGAAAATACAGGGTAAGAAAAAGAAAACTTAAATACTTACCCTTAAGACAATGGCAACCTCAT  
TTATAATGCATACTATCAACACAAATATGGGGAAATCCCTTTTTTACAAATTGGTTCATGGTGACCAA  
TTCCCCAAAATTGTTGGTAATTTTCAAAGTATTGTTGCCAATTTTTGTTGATGTTGTTTGGTGCATG  
GTTGTGTAGTCTCCATGTCTGAAGTCAAATGAGTATAGGATGCTTTTCGGGGCTGTCCCTGGACTCTGTA  
TAGTTATGTCTTCTGGTAAGCATGTTTGTGATGGACTAAATCCTTGTTTAAATGATTCATCTATAAT  
TTTTCTTTTTCTCCTGCGTTTCTTCTGATGTTTGGAGAACTGGAACATTTGTTGGAGTAGTTTTGCTG  
TTAAACAAGTTTTGCTTTTTATGTAGCAAGTCTTTTTATATGGCGTTGCCATTGTTTTAAAGTTATTT  
CTGCTACTTTAATTTGACTTGTGTCTGATGGTGGGTTTGTGCCAGTGTAGTAGTAAAAGTAAAAGGATTG  
AGTTTTGCTGACTCTGGTCTGTAATTTGAGAAACAGTTTCTTAAATGGCCAGTCTTTGTAATTTCTG  
TTGTTTTCTGCTGTTACGGGGTATAGGAAGATATTCTGGTGGGAAGGATTTTCAACATTTACTGTTTT  
ATATAATTTCTGGAACCGGGTGGTCCCATCCGTTGCCCTTCTGTGTTACTTAAAAAGTAGCTTTGTG  
TCTGATGTTTGGAGAACTGGAACATTTGTTGGAGTAGTTTTGCTGACTCTGTTCTGTAATTTGAGAAA

DELTATORQUEVIRUS\_PROBE01  
DELTATORQUEVIRUS\_PROBE02  
DELTATORQUEVIRUS\_PROBE03  
DELTATORQUEVIRUS\_PROBE04\*  
DELTATORQUEVIRUS\_PROBE05  
DELTATORQUEVIRUS\_PROBE06  
DELTATORQUEVIRUS\_PROBE07  
DELTATORQUEVIRUS\_PROBE08  
DELTATORQUEVIRUS\_PROBE09  
DELTATORQUEVIRUS\_PROBE10  
DELTATORQUEVIRUS\_PROBE11  
DELTATORQUEVIRUS\_PROBE12  
EPSILONOTORQUEVIRUS\_PROBE01  
EPSILONOTORQUEVIRUS\_PROBE02\*  
EPSILONOTORQUEVIRUS\_PROBE03  
EPSILONOTORQUEVIRUS\_PROBE04  
EPSILONOTORQUEVIRUS\_PROBE05  
EPSILONOTORQUEVIRUS\_PROBE06  
ETATORQUEVIRUS\_PROBE01  
ETATORQUEVIRUS\_PROBE02  
ETATORQUEVIRUS\_PROBE03  
ETATORQUEVIRUS\_PROBE04  
ETATORQUEVIRUS\_PROBE05  
ETATORQUEVIRUS\_PROBE06  
ETATORQUEVIRUS\_PROBE07  
GAMMATORQUEVIRUS\_PROBE01  
GAMMATORQUEVIRUS\_PROBE02  
GAMMATORQUEVIRUS\_PROBE03  
GAMMATORQUEVIRUS\_PROBE04  
GAMMATORQUEVIRUS\_PROBE05  
GAMMATORQUEVIRUS\_PROBE06  
IOTATORQUEVIRUS\_PROBE01  
IOTATORQUEVIRUS\_PROBE02  
IOTATORQUEVIRUS\_PROBE03  
IOTATORQUEVIRUS\_PROBE04  
IOTATORQUEVIRUS\_PROBE05  
IOTATORQUEVIRUS\_PROBE06  
LAMBATORQUEVIRUS\_PROBE01  
LAMBATORQUEVIRUS\_PROBE02  
LAMBATORQUEVIRUS\_PROBE03  
LAMBATORQUEVIRUS\_PROBE04  
LAMBATORQUEVIRUS\_PROBE05  
LAMBATORQUEVIRUS\_PROBE06  
THETATORQUEVIRUS\_PROBE01

CGGCGTCTGCTGGGTTCTCTAGTTGTTTTGCGGCCAGCGGCCGCGCATACTGCTGGTACCCTCGAGCG  
CTTCTGTATCTTCGGCGAGTGTAAGCATTTCTGCGTCGGTAATAATGTCGCCGTCCTCCGTAGAAAGTTCC  
AATGTTCTTTGTACATTGCTTCCAAAGTAAATACTCCGTATCCATATCTCCGGGATACACGTGAAATGG  
TCTGTGAGGATCCGTCCTTGTACATGCTCGCTGGGTCGCACGGTGTACTTATGAGGGTTTTGTGGTGGTG  
GCCATAGGTAGTTCTGAAATGCTGTACATGAAGTCCGCTTGAAGTGGTTTATAGGGAGAGCCGTAGAGGT  
TTTTGTTAGTTTTAGTACAAATGGGCCAGCCATAGCAAGTTGGTTAAATTTGTTGAGTGACTCCGCTACC  
AGGAGCTGCTTTCTAGTGGCTCTCCAGGTCGGATATGGAGGGCTCCGAGTTACTCTTTGGCGGTATCG  
TATCATTCTTTTATCATAAGTGGAAGGATCAATAGTTTGTGCAGGTTTACTTATGTCAGCCATCCAAGG  
GAATTTTTGTAGGATCAGCAAGTACTTTGTCTTGTAGAAATCTCCTCCCATGAAAGTGTGATTTGTA  
TGGGTTCTGTGCAGTTGCACCAGCTCTTGTGGCTTAGTAAACAGCTGTGCCACCAGATCTTAGCAGGATC  
TGCGGCCAGCGGCCGCGCATACTGCTGGTACCCTCGAGCGGGTCTGATGCTGTGGAGAAGGAGGAGAA  
TGTGGCGTCTCCTTACCCTTCTGTATCTTCGGCGAGTGTAAGCATTTCTGCGTCGGTAATAATGTCGGC  
ATTTTAGGCTGAAGGGACTGGCTATGTACAGTGTGTTGTGTGCTGGTAGGGAGTCGTATACGTCGGGGC  
AGTTTTGGTGTGGTTGTCGTAGGTTCCGCAAAGCTGGACTCTGGCGTCTTCCAGCTTTCGGGGCGTCT  
CTTTCGGGGCGTCTCTGGGGTCGGCGACATCCAGCAGTAGACGCTTTCGGGCCGTAGTAGGTCGGCGGT  
AGTAGGTCGGCGGTAGTTCTGACCTCCTTGTCTTCTTCTTCTTTTTTTGTGGGCTGCCCTCCTCTGTGG  
CTTCGCCACCAGCGGCCGCCCGTCTCCTCCAGCGCTCCTTCTCCAATACCTCCGGCGTACGCCATGG  
TGGCGTCTTCAAAGCGGGCAGCGCGGGCCATAGCGGGCGTGGCGCCATCTTCTCCGCTTCTGCGCC  
ACAGTTCGAGGTCGTCTCCATCGTCTCCAACGGCGATAGATGCCATGACCTCTTCGGGATCTTCGTC  
CTTCGAGGTCGTCTCCATCGTCTCCAACGGCGATAGATGCCATGACCTCTTCGGGATCTTCGTCCTC  
CGGGGTTTGGTGTAGTACAGCAGCCTGTGTTGCTCTTGGAGGGTTCCCTGGGGTCCCATCCACC  
GTCGTCTGAGGAGCTGTCTTCGGGGTTGGGTCTGAGTACAGCAGCCTGCTGTTGCTCTTGGAGGGTCT  
GTTTCGAGGTCGTCTCCATCGTCTCCAACGGCGATAGATGCCATGACCTCTTCGGGATCTTCGTCCTC  
GCCTGTGCATGAGATATCCTGGGGTATCCAGGTCCTTCTGCTCTGTTTTTTGCGAGGCTGTTTTGTC  
CTTCGGGATCTTCGTCCTTCTTTTTGTAACGTGATAGGATACGGCGACCCATCTCCGCCTTCTTC  
GGATGAGCTTGAGGATGTTTTCTCCGTTTCTGCTCCTGGCATGACTTTCTTCGAGAGAGAGAGGAG  
TTTTTTGGGTGCTGGTTCTTCTTCTGCGTCTGCGACGGCGCGAGCAGGTCCTTATATTTTGTCTTC  
TGCTGGATGAGCTTGAGGATGTTTTCTCCGTTTCTGCTCCTGGCATGACTTTCTTCGAGAGAGAGAGA  
AGACATTGGTTGATCTTTCCGTTTTCTTTGTGGGTCTGGAGGACTGGTAGTAGTCTTTTTTTCTTGG  
TAAATGCTTGTGCTAACTCTTTTTAGTTTTCTGCTCAAATCCTGGTTAAATCTGGTAAGGGTATTCT  
TATCTGTTCTATCCATTGGCCTATGTTATATTCTGTTTTTTACCTCCATAGTTAGAGACAAATATCAT  
TCCACAGGTGGTCTCTCAGCTACCGCAGTCGAGTGGTGGTCTGTATGGATGTACAGCTGGTCAGCCA  
CGTCAAATCTGTGTCATACAGAAACAAGTAGCCCTGATTCTCTGTTGGATATAGTCTAATTCTGCACCC  
CTCTCTCTTCTCTTCTTCTCGGTTTCCGGGGCTTTGAGGAACGCCGACTGCGTGTAGGTATTTGGTG  
GTGGCGGTATGAAATGCTCTTTACTCTCCGTCTAATGGCATCTTTTGTTTACATACTATTAACGGGA  
GCAGCGGTGATACCTTGATCTCAATTTGGGTCGCGATTCCGCCTTGGCCGCGTATTTGGGGTGTGTA  
CTTCTCCTCCATCCGCTCTTCTTCTATAATATCTGCGGCGGGCCAAATCTGCGTCTGCTAAAGC  
CCGATAGTGGTACCTCCTGAAGGGTCTCCTCCATCTCCGGCGCTGAACCTCCTCGAAATGGCATTCTT  
ATCACAGTCTCCAGAGACCTTAAAGACATAACGGTATTTGAACCAGAGTGAGCAATTGTCTCCATTATA  
CATCTGGATAACTGATCAATGAGATTGAGGATTCGGTGTCTTGTGCTTTCGTAGGACATCTGACTGTCCGA  
GATGAAGCATTTTATCAGTTACTTTTTGTCCAATTTAATCATATATTCTGTCTATTAACCCAGGCATT  
GGACTAGTCCACTAATCTCTCAAGGCTGTCTCCGTGAGGATCCCCTCATCTGTGTCTCCGAGGAGGA  
ACTGTATGGTCAAAGTACAGGAGATTGAGATTCAATGACCAAGTCCATGCGAGACAAAGACATAT  
GCCTTCGGTATCTCCTTACCCGCTCCGGCGGCCAGGCTCGGCGTCTCCAGCGGGCGAGCATAGCC

THETATORQUEVIRUS\_PROBE02  
THETATORQUEVIRUS\_PROBE03  
THETATORQUEVIRUS\_PROBE04  
ZETATORQUEVIRUS\_PROBE01  
ZETATORQUEVIRUS\_PROBE02  
ZETATORQUEVIRUS\_PROBE03  
ZETATORQUEVIRUS\_PROBE04  
ZETATORQUEVIRUS\_PROBE05  
ZETATORQUEVIRUS\_PROBE06  
GUANARITO\_VIRUS\_PROBE01  
GUANARITO\_VIRUS\_PROBE02  
GUANARITO\_VIRUS\_PROBE03  
GUANARITO\_VIRUS\_PROBE04  
GUANARITO\_VIRUS\_PROBE05  
JUNIN\_VIRUS\_PROBE01  
JUNIN\_VIRUS\_PROBE02  
JUNIN\_VIRUS\_PROBE03  
JUNIN\_VIRUS\_PROBE04  
JUNIN\_VIRUS\_PROBE05  
JUNIN\_VIRUS\_PROBE06  
JUNIN\_VIRUS\_PROBE07  
JUNIN\_VIRUS\_PROBE08  
JUNIN\_VIRUS\_PROBE09  
JUNIN\_VIRUS\_PROBE10  
JUNIN\_VIRUS\_PROBE11  
JUNIN\_VIRUS\_PROBE12  
LYMPHOCYTIC\_CHORIOMENINGITIS\_VIRUS\_PROBE01  
LYMPHOCYTIC\_CHORIOMENINGITIS\_VIRUS\_PROBE02  
LYMPHOCYTIC\_CHORIOMENINGITIS\_VIRUS\_PROBE03  
LYMPHOCYTIC\_CHORIOMENINGITIS\_VIRUS\_PROBE04  
LYMPHOCYTIC\_CHORIOMENINGITIS\_VIRUS\_PROBE05  
LYMPHOCYTIC\_CHORIOMENINGITIS\_VIRUS\_PROBE06  
LYMPHOCYTIC\_CHORIOMENINGITIS\_VIRUS\_PROBE07  
LYMPHOCYTIC\_CHORIOMENINGITIS\_VIRUS\_PROBE08  
LYMPHOCYTIC\_CHORIOMENINGITIS\_VIRUS\_PROBE09  
LYMPHOCYTIC\_CHORIOMENINGITIS\_VIRUS\_PROBE10  
LYMPHOCYTIC\_CHORIOMENINGITIS\_VIRUS\_PROBE11  
LYMPHOCYTIC\_CHORIOMENINGITIS\_VIRUS\_PROBE12  
LYMPHOCYTIC\_CHORIOMENINGITIS\_VIRUS\_PROBE13  
LYMPHOCYTIC\_CHORIOMENINGITIS\_VIRUS\_PROBE14  
LYMPHOCYTIC\_CHORIOMENINGITIS\_VIRUS\_PROBE15  
MACHUPO\_VIRUS\_PROBE01  
MACHUPO\_VIRUS\_PROBE02  
MACHUPO\_VIRUS\_PROBE03

CAGCGGCGGCGAGCATAGCCGCGTCTACGAGATCGAAAGAGACGGCGGGGTCTTCTCCACTTTCGGT  
GCTGCTCCACGCTGCCTCGTGACGCTTCCATCTCTCCCTGTCCGGGCTCCAGGGTCCCGGGGTCGTGGG  
TGAGAAATATTTTTTGCCTTTGCCATTCCATTTCCGGGGTTTTATGACCTTGTGTTTTTGGTCATGAG  
TGGAACCTCTGGACCTGGGGCGGCAACGCTAGCCCAGGCGTTCATGGCCTGTAGGACCGCTTTGTAACC  
TCGGAGCTGCTGGTGTCCGCCTCCGCTCGAGGTATCGCTCGTCTCCGTCCGTGGGGTCTCCGTCCGGA  
GTCCCTGGGGCCAGTATCCGCGGGTCTGCAGGATGTTCTCAGGTGGTCCAGGCGCTGGAGCAGCTGCA  
GGTCGTCTTCTACGGGGCCGACGGCGCCATCGCTCCGGCGCTCCAGCGGCGGTACCGGCGACGCC  
ACGGATTATCGATGCGAGCTCGGCCATCGAACGGAGGGAAGTTAGGTCCCTCCACCTTGGTTGCTGGCA  
TCCCGAGCCGGGTTTCTGAGGGCTCTGTAACAGCATCAAGAGATCGCTTAACCCGGTCCGACAGCGGAGG  
AAACACCTCAAGCAGAGGTAATGATCAGAGCATTTAATCAGATTCTTGTGAGCAAACCGCAACACTTGC  
TTGTCAGCAAACCGCAACTTGCAGTTGTACCTCCATAGAGACTGTGAATGGCAGTCTCTAAATT  
TACAGGAAAGGCTTGGGAATTTGTTCCAGACAGATAGAAAGTCCCTACTACAGACTTTGGTGTGTCGA  
ACCGAAATTGAGTAGGCCACAGAGGACCGCAACACCCCGGATCCCGGTGGGGGCCCATGGGGC  
TCCGGAATGTGATGTCATGTGGGAGCTGCTCCCAACAAATGTTGCAAAGATCAGAGTTTTTACAGATGA  
CCTCTTGTCTTGAAGAGGGTATCTTTACAGAGGTAATGAAAGTTGTCAACATATAGAGTTGAGTTGT  
TGATCTGACAAGGAAACAGTTGCTGGTCTAGACAGCCGAAAAAACGGTCAGAATTTGAGATTGGCT  
GCTTCTTGTGACAGGATCTTCTGCAAGCGCTAGGAATACAAAGAATTGGAATAAACACTTTTTGTACA  
TTATGTTTCTATTCAGACGACTCTCTACAGAGTTCACAAAGCATCAGCTCAAATACAGGGAACTTGAAT  
CAGACACTCTCACGGCATCTTAATGAAGGACATAGAAGATGCAATGCCAGGAGTTCTTAGTTACGTGATC  
AAGAGATCTTAACTGGTTGATGTTAAGTACATCTGAACAAGCCAGGCAGTTTATCAACAGGTCTGG  
TTTTGTCTGCTGCTACACAATGTTAAGTGTAAACTCCAACACAAGTGTGAGACTTATGACACAA  
CAACACCTTTGGCTCGACATTGAAGGACCGCACTGACCCTGTTGAGATGGCATTATTCCAACCTGCA  
TTAATGATGGCAATGAGACTGACTGCAACAAGAGCAATGTTGAGAGCCTCCTGCAAAAAGGTTGGTATTT  
ACTAAGCTGATGACCAGGTTAGTTGAAGACTTCTCAGAAGCTGTGGGTAGTTCAATGAGATACACATGCT  
GATAAATTTGGTACTGGTTGGAATTTCTCAAATTTCAAGGTGGCATTGAGCAGATCTTAAATGACCTGC  
GGATTGTTGAAAAGAGACCCACCATTGAGAAGGACACAGTCTGGAACCTCAGTGTGACGTCGGATTTGA  
GCTAGGACCCAAACACCCAACTCAAAGAGTTGCTCAATGAAATACAAATGTAGTCCCAAAGAAGAGGCC  
TCCATACCGGAGCGCTTGTGATAGTAGTCTTCAGGGACTCACAGAGTCTAAAATTTAGACTCTTCAA  
ACTCCTCATAGGGAGGTAGGGAGCTTGGGACTGTTGACACCTTCAAGTTGGTTGGCAGTGGATACTTACA  
CCCCATTTGCTGTGATCCATACTATAGTTAAGAACCCTTCCCGCACATTGATAGTCAATGACAAGATTG  
TCAGGGTTACTTTCTGAAAGTTTCTCTTAATTTCCCACTTTCTAAATCTTCTTAAACCTGCTGAAAA  
GGACAGGATTCGACTGCCTCCTGCTTAATGTTAAGATATCATCACTATCAGCAAGGTTTTATAGAGCT  
GCAGTGGATACTTACAGAGAGGACATCTGTGCGAAACTGACAGCAGGAGATTGAGACAGTGTCTGCAAA  
CGGTAAGAGAACCCAAACCAAACTGCAATCATTCTAAACATAGGCCTCTCCACATTTTTGTTCA  
CTATCCTGTTCTATATAGTTTAAACATAACTCTCAATTCTGAGATGATTTATCCATTGCGCATCAA  
CTTAGTCTAGCAACTGAGTAGTTTTCTACTGTTTGAAGGCCAGACAAACAGATGATAATCTTCTCA  
GATAGTGGTCATGGCATCTAACCAAGCTGTCAAATTTCTGCCAACATGATTTACAATTTAGAGGACCAAG  
AACTTGAGTCCCTCAATCAGAACCATTCTGGGTTCCCTTTGTTCCAGAAAGTTGAGTTTCTGCCTTGACA  
GAGAACCACCCAAACCAAACTGCAATCATTCTAAACATAGGCCTCTCCACATTTTTGTTACCCACT  
ACAACTTTGTGAGAAGAGGGACTTCTCCCCCATACATAGAATCTAGATTTAAATTCTGCAGCGAAC  
AGGTGGTGTCTGGCAAAAGCTCTGCTCTGCCTGTATTGCTGGTGTCCCTTTCTTCTTGGACTTGCCTTG  
TGCTCACAGAAGGCTTCAAGTTGCTCTTAGTCTTGTGAACTTGAGTCTGTGAAGCACCGCTGCCA  
GCACAGTGGATCCTAGGCGACACTTGGCATTGTAATGTAATGTCCAAGATTGAAAGGCTTAAAGAAA  
GGTCAGAATCTAAGACTAGCAAACCTGACTGAAATGCAAGAAGCAGTGATTAAGAGGCTGTAAGAAGT

MACHUPO\_VIRUS\_PROBE04  
MACHUPO\_VIRUS\_PROBE05  
MACHUPO\_VIRUS\_PROBE06  
MACHUPO\_VIRUS\_PROBE07  
MACHUPO\_VIRUS\_PROBE08  
MACHUPO\_VIRUS\_PROBE09\*  
MACHUPO\_VIRUS\_PROBE10  
MACHUPO\_VIRUS\_PROBE11  
MACHUPO\_VIRUS\_PROBE12  
MACHUPO\_VIRUS\_PROBE13  
MACHUPO\_VIRUS\_PROBE14  
MACHUPO\_VIRUS\_PROBE15  
MACHUPO\_VIRUS\_PROBE16  
MACHUPO\_VIRUS\_PROBE17  
CHICKEN\_ASTROVIRUS\_PROBE01  
CHICKEN\_ASTROVIRUS\_PROBE02  
CHICKEN\_ASTROVIRUS\_PROBE03  
CHICKEN\_ASTROVIRUS\_PROBE04  
CHICKEN\_ASTROVIRUS\_PROBE05  
CHICKEN\_ASTROVIRUS\_PROBE06  
CHICKEN\_ASTROVIRUS\_PROBE07  
CHICKEN\_ASTROVIRUS\_PROBE08  
CHICKEN\_ASTROVIRUS\_PROBE09  
CHICKEN\_ASTROVIRUS\_PROBE10  
CHICKEN\_ASTROVIRUS\_PROBE11  
DUCK\_ASTROVIRUS\_PROBE01  
DUCK\_ASTROVIRUS\_PROBE02  
DUCK\_ASTROVIRUS\_PROBE03  
DUCK\_ASTROVIRUS\_PROBE04  
DUCK\_ASTROVIRUS\_PROBE05  
DUCK\_ASTROVIRUS\_PROBE06  
TURKEY\_ASTROVIRUS\_PROBE01  
TURKEY\_ASTROVIRUS\_PROBE02  
TURKEY\_ASTROVIRUS\_PROBE03  
TURKEY\_ASTROVIRUS\_PROBE04\*  
TURKEY\_ASTROVIRUS\_PROBE05  
TURKEY\_ASTROVIRUS\_PROBE06  
BAT\_ASTROVIRUS\_PROBE01  
BAT\_ASTROVIRUS\_PROBE02  
BAT\_ASTROVIRUS\_PROBE03  
BAT\_ASTROVIRUS\_PROBE04  
BAT\_ASTROVIRUS\_PROBE05  
BAT\_ASTROVIRUS\_PROBE06  
HUMAN\_ASTROVIRUS\_PROBE01

AGCGATGTTTCAGAGCTTCTGTAGAAAAACAGGAATCTCCTGAAAGAAGCTGATAAGCTGCCCCATGTGT  
GCGCTTGGCTCCACGGGAACCGTGATGGAAGTTGGCAGTGGTTCCAGCATATGTGACAAAGTTCAGAAT  
TTCTGCTGGAGACCTTTGTAAGAGTAAACCCAGATGAGTTTCGAGAAGAAATGAAAAGCTGACATGTCAA  
CCACAAGATATGGTGATTACAACCTCAAGGTTCTGACGACATAAGGAAACTTTTAGACATTATGGACGGA  
CAGCAAATTTGGGAGAAGTTTGGACATCTTTCGAAACATCATAATGGAGTTGTTGTCAACAAGAAAAAGA  
GGTGTGTTGTGTTGGGGCCCTTCTGAGGGCTTGTTCAGATTGCCAATTATGGGGACTCTGTGCTGT  
GTTCAGAAGTGGTGGTTCAAAGGCTTGCAGTGGGACTCTTCATTAGACTACTTAGTGGTGAGTCAGATGC  
GGGAGATCTTGGGACAACACAAGTGTGATCTAACAAAGAAACCTCAAGTTGGACCGAGACAACCCGAGA  
AAGGGTACTGACTGGAACCTCAGTGTGTAGGCCTATTTGAATGTGCCATCCGAGCAGGACCTCCCTGCT  
AGTGGTTCCAGCATATGTGACAAAGTTCAGAATTCCTGAGCATTGTTTGTGACATCTTAGGCACAAAT  
GTGATCCAAAGAGATTCTTCTGCCTGTTTTCTGATGAAGTTTTGGCTGGAATGTGTGAGGAAATGAC  
TTAAATTGGTTC AAGGATGAGGTCTTCAGCAAAGTCTGGGCAAATTC AATTGACTGACAGAAGGGA  
TGGAGGATCCATAAGCCAGTCATGTCCCAAAGCATTGAGAACCAATGAATAGCCAGCTGTTGAGTCAGAC  
GTGTCCGCAAACCAACAACATTTGCAATTTGACGGCCATAGAGGCTGGGTGGGGCTGTTCTCCTGAACT  
TCGCTTTGGTCTTATGTTTCTGCCACGAACGGTCTCTTAGTCTTACCTTTCTTCTCTCGAGGGCAAC  
GTGAAGCAAAGGAAATCCTAATACCGCCCATGACCTTACGAACAATCTCATCAGCGAGGTCTTCATCAGA  
TTGAACGCCTAGTGAGAAAGAATTTACGCAGCTCACGCATTCTTTGGAAGAGCTGAACCGGAATGGTGCC  
CCTTGGCTTGAGATGTTAAGCCTTCCAGGTGATTTAGCTATTTTTGCTTCTCCAACAACATGGCCTGC  
CTCCAAATTTTGCAGATTTCCAGTAACCTCGTGTGAGCTGGTATTCTGTGAGAAGAATTGTTGAACC  
CAAGAAGGGGGTCCAGCCCATGAGCATGATCGTGTTCGTTCTGTTCTCCTTCATGCGCTCAATTTGTT  
TTAGATAACGGAAGCCGAAACCCAGCCGTTACAACAACCCAGGTAGTGAATTTGGAGTTCAAGGAAA  
CGCCAATAACCGACCCCGGAGTGAGATGTCATCGTCCGAGTCCGGATCAGATTTTGCATCCACCCCAAT  
GCGTCCAATCAAGTTCTAGGACTTGGGTCTGCCACAGGACGTAATTCCTGACACGCTTATCCAGTCC  
TAGGTGAACCCGATGTACTGCATAGGTTTGAAGGGAGCATTAGGTAATCGCCGTCAATATTAGCCCA  
ACATCCCAAAGATATTTTATACATATCAATGGTCACTGAGGGTCTGAGTTGACAAAGGATGGATTGAA  
CCTGCCCATTTCTGGCTCTTCATCATGAGTGGATTGAGGAAGTACTTGTGTTTTCTTCCAGAACATT  
AGAAAAACCTCATCTGTCTTATGCGGTAGAAAAGCGCTTTTGGGATTGTACCGTCAAAGCGCTCCAGTC  
TAATTTTCACTCTGCAGACCAGCCTTATCAAGCATTCTCTGGTATTCTCCTCTGCCAAGACTTTCAATTT  
ACAACCTACCATAAACATCAGCATAAATCACGTTGTACTCAGTTTTATTCAACTCAACTGCCTGTGTTGT  
CATTCTCATCAGCATTGCAAATTTGACTGTTCTTATATTGTTTTGGAAGGATGTTTGATTATCTGACAG  
CAAAATTTATTGGATCTCTATAGTGAATTTTTCAAACATTTTGGTATATGCTTCCACAGTCCAAGTAGT  
TAGAAAATTGTCCAGATGGATTGCCACCATAGATCTTACAAACCTCACCTGTAGGGAGAAGGACAACCTT  
TCTGCATCTGCAAAAAGTGGTACCAGCACACCGGAAATCCAACCAACTGGCATAGCCCAGTT  
AAAATTTACGGAAGATGCCTACAGATGTGTCTTTCACCCCAATAGCAGTTGTGATATCTTAAGATACAC  
TTGTCAATACCAACGAGCCATCTGACAGGTTTGTGAGCCTGAGTTGAGTTGAGTTCCGCTCGCATCGCCCTGCGAT  
TAGCATCAACTTTTTCTTCTCGTCCCTGGCGCTTGTGAGTTGAGATTCCGCTCGCATCGCCCTGCGAT  
TGGCCCTTCTATGTATACCTCCAAAAAGGGGGACCACCAACCTGGGCATGATGATTTTCAGTTTCCAA  
CTGGATGAAGGAAGAAATTAAGCTCCAACCTCGGCATTGTCAGTTGATTGGGCCAATCATACAAAAGT  
AAAGGGCGACCATCCACATTGGGCTTGCTCCATTTAGTCATATTTTTCATGCGGTTATTTGATCCTGT  
AGTCCAATCGAECTCAATGACTTATTCCAGGAATATCAAGCCTTGATATTAATTCGTGGAATCCGCC  
AAGAGAGGCATGCGCCTCCTCAAACCAGGCTTAAACCGGATCGTCATCCGGAAGATTATGTGTTAAAATC  
TAAGATAACGGCTTTTTCCAGAACGGGAAACCCGAAACCTTCTTACAAACCACCAACCACCTTAAT  
ATTAACAGGCTCTGCATAAAAGAATTTTTCAAACCTTTAGCATAAGCACTATAACCCCACTGTGAGGT  
TATCCATTGTTGTTGAAAACCTGACCAGATGGATTACCTCGCGCTGCAAGGTGACTTACCAGATGGTAG

HUMAN\_ASTROVIRUS\_PROBE02 GATAAGTTGCCCAATCAGCGAAAGCACACAACCTGTGGATATTCTGAGAAAAAGTCAATTGGTTCTGCATA  
HUMAN\_ASTROVIRUS\_PROBE03 TCACTCTCTCCTCATAATCATCGGGCACC GAAGGTGTTGTAGAAAGCCTGTCATCTCCATAAACTACAGT  
HUMAN\_ASTROVIRUS\_PROBE04 CCTTAAAGGGGTGGTCTCTGCCATGAACGCAGCAAGCAACTGATAGCATAGGAGTTTCCCATGGAGTGA  
FELINE\_ASTROVIRUS\_PROBE\_01 CGGACCAGCTTGTGAAGAGGGTGTGACGTGGGGTTCAGGGACACCCTCACAACAGTACCATTAACGGC  
FELINE\_ASTROVIRUS\_PROBE\_02 CCACTTCATCGTCTTCGTCTCGTACTCTCGGTTTCAGTGTCTGTCTCTTCATCGCTTACGCTCCCTCCC  
FELINE\_ASTROVIRUS\_PROBE\_03 CGGAAGCTCGGTAAAAATACCTACCCTGGGCAGTCCAAGTATAGTTAGGTGTGTCGCCCTTAGTCCGAAC  
FELINE\_ASTROVIRUS\_PROBE\_04 TAGGGGTAAACCCCGTAGTGAGCAGGTCCATGTACACACCACGCCTAACCTTCTCGGCTAGGGTGGGGTA  
FELINE\_ASTROVIRUS\_PROBE\_05 CGCCAGCTGGGATGCCACCTGTACAGATAGCAGGTTTGTGGACAGGGCATCCTGATAGCTGGGATAGAC  
FELINE\_ASTROVIRUS\_PROBE\_06 CACCTATAACATTGAGCACATCACCAGGCTCCGGGGTGGATATGCCGAAAGTGACGGGCGTCTCTCCATG  
MINK\_ASTROVIRUS\_PROBE01 TGGTTGTTGAAATTTGACCTGATGGGTTGCCCTTGGTCTGACGGGTGACCTACCACTGGGCATTAAGAC  
MINK\_ASTROVIRUS\_PROBE02 CGAAGGATGTGACATCAGCCAGCGGACACGGACAGTAGTGTCCGCGCCAACAACGTGGCCAGCAGTGAC  
MINK\_ASTROVIRUS\_PROBE03 AATTCAATGACATCCTGTAGATGGAACCAAGTACAGCATCGACCCAATAAGGGAGTGCATTTGACCTC  
MINK\_ASTROVIRUS\_PROBE04 GGGTGGTGGCTTCTTAGTGTGGTCAAAGCGATTGGCCATGACCGGTTTGTGTTCTGCGCATCGGCA  
MINK\_ASTROVIRUS\_PROBE05 CCCGTAGCTCTTCAATGCTCTTCTCTGGATGGATATAGGCATACTCAAATGCCCTGGAAGAACACGTTGCA  
MINK\_ASTROVIRUS\_PROBE06 TCATGTTCCAGAAGTCTGCAAGGGCAACCTGGAGGCTAAAAGATTTAACCTTCCCAATGCAAAACACAC  
OVINE\_ASTROVIRUS\_PROBE01 CATACTCATGTGCTAGGATTTGATGTTCCATTCTAAGCTGACTTAATTGACTCTTCAGGTCCTCAACCTC  
OVINE\_ASTROVIRUS\_PROBE02 GCTTACGCGCGCCGAGACCACCCACGAGGTGGCCCGAGGGGACTGGGTGAGATTGAGGGAGGCTCTTGT  
OVINE\_ASTROVIRUS\_PROBE03 CCTCTGGGATGTCTGCACCATAAGCCACTGGCTCAGTTAACTTAAATAAGTCTGGGCCTGGTATGTGGT  
OVINE\_ASTROVIRUS\_PROBE04 ACAAAGATTTGCCTCATCAAAGCGGTATACTATGGGGCCATCAGTAATAGCCTTAGCAAACCTTATA  
PORCINE\_ASTROVIRUS\_PROBE01 ATTAAGAGTGGCTGCTTACCACAACATATCTATGTGGCGTCGCGCGCCAAGACCAGACCACCCAGTG  
PORCINE\_ASTROVIRUS\_PROBE02\* TGCCTCGAGTTCTGTCTCCCGCTGGAGTTGCTTCCAATGTTCCAAGGGTTGCTGTTGCCGTTGACGG  
PORCINE\_ASTROVIRUS\_PROBE03 GAAGCGTATTCGCCACAGTGAATACTGTGCCCTAAAGCAACGATCGGACCAAACGTGTTATTCCTGTA  
PORCINE\_ASTROVIRUS\_PROBE04 TTGAAAGCTGTACCCTGTTCTACTCGGCGTGGCCTCGGCTTTCAGAAATGGGTTCTTAAAGGAAACC  
PORCINE\_ASTROVIRUS\_PROBE05 TTTGACGCTTCGGACCAAGCACTGCTGGGGCCGAACCCGCAATCAGGCTGTCCATAAAGACTCCTC  
HUMAN\_HERPESVIRUS\_5\_PROBE01 CGGTTGCGACGCGGTTTACGTAGGCTACGCAGGTATTTGACGTGTAACCCAGACCCATGTCTACGGTGT  
HUMAN\_HERPESVIRUS\_5\_PROBE02 CACCATGACGACTCGGACGCCATCACGGACGCCGAACCTCATGGATCACACCAGTCTGTACGCGGATCCCT  
HUMAN\_HERPESVIRUS\_5\_PROBE03 TCCGCGCGCGCCGAGCCGCGCCTGCGAGGACCTCTCGGAGCTGTGCGAGAGCAATATCATCGTCATC  
HUMAN\_HERPESVIRUS\_5\_PROBE04 TAAAAAATTGTGCAAAAAACACGGCTCTGAAAAGTTGCTTTGATGAACCGCGCCGTGCGCTTAGCAT  
HUMAN\_HERPESVIRUS\_5\_PROBE05 GTGACACAGCAACGCTATTCTGTTTCGGGACCGTCTGACCTTTGCTGTAGTGGTTGGGAGGATAAAATC  
HUMAN\_HERPESVIRUS\_5\_PROBE06 CATAAGGGTACATGTGATAACCACCGAACCCGCAATATACACCTTGGTGGCGGCCGTGCTGGCCGGAT  
HUMAN\_HERPESVIRUS\_5\_PROBE07 TTGGCCGGTTCAACGGTTGCCGGTCCGACTACCTGTACGCCTTCCATGTTACGCGGCAGGTGCGTAA  
HUMAN\_HERPESVIRUS\_5\_PROBE08 CGTCTGACGCGGTAATAATGCGGTATGCGGCGCGCCGACCGCCATGGGTTCTGCTGAAAACGACACT  
HUMAN\_HERPESVIRUS\_6\_PROBE01 GCTCAACAGGGAATTGGGGCAGAAGGCTGAGTACACGGAAAACGGTGTTCGTTGCCAATTATAAAATTCT  
HUMAN\_HERPESVIRUS\_6\_PROBE02 CGTCAAGCTTTCCGTTGACAATTTTGGGGTGAAGTCTGACTTTTGGCAGTTGCTTTGATGTTCCAGT  
HUMAN\_HERPESVIRUS\_6\_PROBE03 TTTGTCTGGCGTACGTTGAGAAGTCTGCAAATAGTTTTCTAAATTTGATTTTAAAGTGATGTTTATAAA  
HUMAN\_HERPESVIRUS\_6\_PROBE04 TTTGAAGAAGAAGATGGGATGTGTCTGTGTCTGATGCTTTGGAAAATTTTTTCCAGGCTTGATGAGG  
HUMAN\_HERPESVIRUS\_6\_PROBE05 TACACTTTCATAGGAAGTAAATACAATAGTAACTTCTCTTTTTTATATCGGTTTTCGGAAAATGGGTG  
HUMAN\_HERPESVIRUS\_6\_PROBE06 GTCTTTCTACCAGATCTACCCCTTAAAAATTAAGCGAATCATCTGTCTACCAATGTATCTTTTTT  
EUROPEAN\_BROWN\_HARE\_SYNDROME\_VIRUS\_PROBE01 CCGGTGTTCTTACGCAATCTGGGCCACACTTCTTATGGGCTCTGCTTTACGAGACAAAGTCAAGTGGT  
EUROPEAN\_BROWN\_HARE\_SYNDROME\_VIRUS\_PROBE02 ACAGGCCAATCTCATCACATGCTTTATAAACTGCTGCAGACCAAAGCAACCAATGACAATTGAGTTGAT  
EUROPEAN\_BROWN\_HARE\_SYNDROME\_VIRUS\_PROBE03 CATCTATCTTTGTGCGAGTCTGAAAATGTTTTCTTGGAGACCATAAGTTGTGATGGAAGCTCTCTCCAGTC  
EUROPEAN\_BROWN\_HARE\_SYNDROME\_VIRUS\_PROBE04 TTGGGGTACGGCGTACACTCCGTCATCACCATAACAAAGAAGGGAGCATCCTCATAAAGTTGGAACA  
EUROPEAN\_BROWN\_HARE\_SYNDROME\_VIRUS\_PROBE05 TCCCAAGTACGAGCTGTGGATGCTCAGCAACACTTTTGTGAGCATTGAGCACTCCATGTTGCTGTT  
EUROPEAN\_BROWN\_HARE\_SYNDROME\_VIRUS\_PROBE06 TAAACAGTTCAACCCAGTCTCATCACCATTGTGTTGAACTCGTCTGCAATGGCCACATCCTCACCAGT

RABBIT\_HEMORRHAGIC\_DISEASE\_VIRUS\_PROBE01  
RABBIT\_HEMORRHAGIC\_DISEASE\_VIRUS\_PROBE02  
RABBIT\_HEMORRHAGIC\_DISEASE\_VIRUS\_PROBE03  
RABBIT\_HEMORRHAGIC\_DISEASE\_VIRUS\_PROBE04  
RABBIT\_HEMORRHAGIC\_DISEASE\_VIRUS\_PROBE05  
RABBIT\_HEMORRHAGIC\_DISEASE\_VIRUS\_PROBE06  
RABBIT\_HEMORRHAGIC\_DISEASE\_VIRUS\_PROBE07  
RABBIT\_HEMORRHAGIC\_DISEASE\_VIRUS\_PROBE08  
BOVINE\_ENTERIC\_CALICIVIRUS\_PROBE01  
BOVINE\_ENTERIC\_CALICIVIRUS\_PROBE02  
BOVINE\_ENTERIC\_CALICIVIRUS\_PROBE03  
BOVINE\_ENTERIC\_CALICIVIRUS\_PROBE04  
BOVINE\_ENTERIC\_CALICIVIRUS\_PROBE05  
BOVINE\_ENTERIC\_CALICIVIRUS\_PROBE06  
BOVINE\_ENTERIC\_CALICIVIRUS\_PROBE07  
BOVINE\_ENTERIC\_CALICIVIRUS\_PROBE08  
BOVINE\_ENTERIC\_CALICIVIRUS\_PROBE09  
BOVINE\_ENTERIC\_CALICIVIRUS\_PROBE10  
NORWALK\_VIRUS\_PROBE01  
NORWALK\_VIRUS\_PROBE02  
NORWALK\_VIRUS\_PROBE03  
NORWALK\_VIRUS\_PROBE04  
NORWALK\_VIRUS\_PROBE05  
NORWALK\_VIRUS\_PROBE06\*  
NORWALK\_VIRUS\_PROBE07  
NORWALK\_VIRUS\_PROBE08  
NORWALK\_VIRUS\_PROBE09  
NORWALK\_VIRUS\_PROBE10  
NORWALK\_VIRUS\_PROBE11  
NORWALK\_VIRUS\_PROBE12  
SAPPORO\_VIRUS\_PROBE01  
SAPPORO\_VIRUS\_PROBE02  
SAPPORO\_VIRUS\_PROBE03  
SAPPORO\_VIRUS\_PROBE04  
SAPPORO\_VIRUS\_PROBE05  
SAPPORO\_VIRUS\_PROBE06  
SAPPORO\_VIRUS\_PROBE07\*  
SAPPORO\_VIRUS\_PROBE08  
SAPPORO\_VIRUS\_PROBE09  
SAPPORO\_VIRUS\_PROBE10  
SAPPORO\_VIRUS\_PROBE11  
SAPPORO\_VIRUS\_PROBE12  
SAPPORO\_VIRUS\_PROBE13  
SAPPORO\_VIRUS\_PROBE14

TAATGCCATTGCTAGCAGGATTATACACATTATAAGCATTAACTACACTAGCATCATTATGCATATTGCT  
TAACTTCATTGGATTAACCTAATCTACCTAACTGGTCGGCTTTCAAACCAACCCATTCTCCAAAGC  
ATGGTTCACCCAGTTTGTGGGGTGTGTAATATGACAAACCAGCTTGGCACCCCTTTGACCCAACAGC  
AACAAATCCTACCGTTCCACTCACAGACCAGCTCATCAACCCCTTTTCATCAAACCTGATTTGGGCAG  
TGACCAAGGTGGCTCAATTCATTTGGCGTGTGACTAATCCAGTGGACGCCTATGGAACCTGGTCAG  
ATGGCTTTTCTATGTCTGAATTCATCGGATTGGGACTTGCAGGTGCCGGTGTCTGAGCAATGCATTGC  
AGAGCTGCAACTACAAAAACAAGCTATGGAGAATGGGTTGGTTTTGAAAGCCGACCAATTAGGTAGGTTA  
CAACTGCTGGCTGCCTCATCTTCATGGCTTTTGTCTTTTCCACTGTTGTCGGGTACCTGCCCAACAACAG  
CCTCCACCTCCACATTCCGTGCATCGCCATGAACACGCTGGAGCTGGGGATGGGGAAGCTCCACCCGCG  
CCATGGGATGGTAGAGGGAAGTCCGGATGTCTCCAATGTCACCTCAAGCGGCACACCCGCCACGGGCATC  
CAACGGCAAGCGTGCCACCGATGAATCCTGACCCAGCAATGGTGATCCTGATGTCCATTCCACCAGCCCA  
TTCCACCAGCCCAACCTCCATACATTGCAGCAATGTGCTGGGTGTAGGGGTTTCATGCCCGCCGAGCCG  
CGGCAACCCGGCAGGCCGATGACATGATCGGCCCTCGGGACATAGCCCTGCATGATTTGGACTGCCCG  
GCTCGTACGAGTTCCCGCAACAAGGATGCAAGTGTGACCAACGTGGGGCCCAACAGGCACCAAGTCC  
CCTCCGGTGAGGTGGCGAGGGCCACTCTGGTGAGGAGCTGTGAGGGGTGGCCGAGGCCACTCTGCGGT  
TACCGGCCAGCTGCGCAGGACCAAGCCAGGTGCCATTGGCAAGCATAACCGAGCTCAAAGGTTGAACTGGA  
CAAAGTCGTCCGCCCACTAGCGGTTGCATTGAAATTGGGCATTGTTCCAGTGAACCCAATGGGCACGTT  
TGGTTCCTCGCCAGCAAGGTTAATGAAATACACCTGACTGAACCGTTCCGGGATGGTGTTGATTGCCCG  
TTGTACTGTCACCCTGATTCTATAATGTACACCCTTACTGCCATTGTATACTGCATTTTGATAT  
CTTCAATAGTGGTAGACTCGTAGCTTTTTGCCTAGGGAGGCCATGGATATGAGACCCAACCCGTTGGC  
ATCGCTATTATTTGCGAATAATGGCAACCTGTCTGTATTGAAATAACCACTGGCACAGAAGACAGTGT  
TATAATCCACCTCTCTGTATCATCTGCCATTCTTTGGCGGGTCCAGTCAATGGGCTTACGTTT  
GGGCCGCTTCGCCACCAACCTGTATGCCCGCTCCAGAGCACTACCTGCTGTGGAAGCAGCAATTGCACC  
ATTTATAGAAGACCCTGTGACGGATTTCCATTTGATTTCTCCTATGCCACCATCACCACTGCCTGTAC  
TCTCCAGAAGTAGCTGAGGTTGTAGCCAGGACTTACTAGCACCATCCGAGATGGATGTGGGCGACTATG  
TAGCATAAATCACTGGATAATCACCTTTGTGCATTGTCTGAGGCTACTGGCTTATCACCTGATGTGGTA  
TGACATAGACTTTGACCCAACCTCGCTCACCCAAATTCTCAAGGAATACGGCCTCAAGCCAACAAGGCCA  
CGCACCATCTCCCGGACGACGAGGGTTCCAAGGTAGACTGGATAGAGCTCAATTGAACGTCAAATTT  
CTTCTAGGAGAAGCCTCACTCCACGGGGAAAAATTTTACAGGAAAATATCTAGCAAAGTCATACATGAAA  
GATGCGCTTCCATGACCTCGGATTGTGGACAGGAGATCGCAATCTCCTGCCGAATTGTAATGATGAT  
CAGGGGCAGGTGGGACCATAACTGGACCCTTTCTTGAATGCACTCAAAGAAGCTTGCATAGATTGTAG  
GGCGGTGTTGTGCCACAATGGATGATACAGTACCAGCCATGTCCACGAGGGACCCGGCTGCAAGAGCTGC  
CTTCCCCTGTAGAAATGGGCGATCCAGCAGGCCATACTGGACTGTTTCTGTGCTCCCGGCCAGCCGTCG  
CAGGGGTGAAACCTGCACCTACCAGCGCCCGGGTCAATCGGCACCTGATGCAGGTTTTGATGAAGTGAAGT  
GACCTCTCCATCAATGGTCCAGCCGCCGGTCAATCGGCACCTGATGCAGGTTTTGATGAAGTGAAGT  
GGTAGCGTGTGATCTGGGGGAATTTGGATCGACCCATCATGATGCTGGCACTATGGACAGCATAAGCC  
TCCATTGCGGAAACAGCGCCCAACAGCAAAATCTGGAAGGCCCAAGGCCACAACCTGCACAAATCACC  
GCTTGGTTCATAGGTGGTACAGTACCTGACCCAGTGGGTCACACTGAAGGAACCCACAAAATAGTGTGTTG  
GGTACAGTACCTGACCCAGTGGGTCACACTGAAGGAACCCACAAAATAGTGTGATGGAGGCAATG  
TGTGGGCGGGTGGGGCGGTAGTTTTGAGGTCCGGCTATCGATCTCTGGTTCTGGCGTGTTCGCTGGGCG  
GTGGGGCGGTAGTTTTGAGGTCCGGCTATCGATCTCTGGTTCTGGCGTGTTCGCTGGGCGTATCATTGCT  
TATCATTGCTTCTGTACATACCACAGGGTTGATCCCTCGTCCATCAGGGACCCAGCGTGTTCCTCAT  
CACCGGGGTTGATCCCTCGTCCATCAGGGACCCAGGCGTGTTCCTCACGCTTTTCGTTCTCGCAT  
CGGTTGATTTGATTTCTGCCTACTAAGGCCACCAGGTCAACAGATGGAGAATGGGTTTTACCAGAAGG

FELINE\_CALICIVIRUS\_PROBE01  
FELINE\_CALICIVIRUS\_PROBE02  
FELINE\_CALICIVIRUS\_PROBE03  
FELINE\_CALICIVIRUS\_PROBE04  
FELINE\_CALICIVIRUS\_PROBE05  
FELINE\_CALICIVIRUS\_PROBE06  
FELINE\_CALICIVIRUS\_PROBE07  
FELINE\_CALICIVIRUS\_PROBE08  
FELINE\_CALICIVIRUS\_PROBE09  
FELINE\_CALICIVIRUS\_PROBE10  
FELINE\_CALICIVIRUS\_PROBE11  
FELINE\_CALICIVIRUS\_PROBE12  
FELINE\_CALICIVIRUS\_PROBE13  
FELINE\_CALICIVIRUS\_PROBE14  
FELINE\_CALICIVIRUS\_PROBE15  
FELINE\_CALICIVIRUS\_PROBE16  
FELINE\_CALICIVIRUS\_PROBE17  
FELINE\_CALICIVIRUS\_PROBE18  
FELINE\_CALICIVIRUS\_PROBE19  
FELINE\_CALICIVIRUS\_PROBE20  
FELINE\_CALICIVIRUS\_PROBE21  
FELINE\_CALICIVIRUS\_PROBE22  
RABBIT\_VESIVIRUS\_PROBE01  
RABBIT\_VESIVIRUS\_PROBE02  
RABBIT\_VESIVIRUS\_PROBE03  
RABBIT\_VESIVIRUS\_PROBE04  
RABBIT\_VESIVIRUS\_PROBE05  
RABBIT\_VESIVIRUS\_PROBE06  
BEAK\_AND\_FEATHER\_DISEASE\_VIRUS\_PROBE01  
BEAK\_AND\_FEATHER\_DISEASE\_VIRUS\_PROBE02  
BEAK\_AND\_FEATHER\_DISEASE\_VIRUS\_PROBE03  
BEAK\_AND\_FEATHER\_DISEASE\_VIRUS\_PROBE04  
BEAK\_AND\_FEATHER\_DISEASE\_VIRUS\_PROBE05  
CANARY\_CIRCOVIRUS\_PROBE01  
CANARY\_CIRCOVIRUS\_PROBE02  
CANARY\_CIRCOVIRUS\_PROBE03  
CANARY\_CIRCOVIRUS\_PROBE04  
PORCINE\_CIRCOVIRUS\_1\_PROBE01  
PORCINE\_CIRCOVIRUS\_1\_PROBE02  
PORCINE\_CIRCOVIRUS\_1\_PROBE03  
PORCINE\_CIRCOVIRUS\_1\_PROBE04  
PORCINE\_CIRCOVIRUS\_1\_PROBE05  
PORCINE\_CIRCOVIRUS\_2\_PROBE01  
PORCINE\_CIRCOVIRUS\_2\_PROBE02

GCACAGACTGGAGGGGGCCTTGTACCCTTTGCTCAAGAATTTTGTAAACTGCTCTACTTGGTTATTTAA  
TCAATTGATCATCATAAAAATTTGATTTGTGTATGAGTAAGGGTCAACCCTAAAACCAGCAGCACGTGC  
CATCCATCCAGTGTGCAACATTGCGAGAACCTTGTACGGGGCAGTAAGCACATCATATGCGGCTCTGAT  
GCGTAAGGTGACGACGAAGAGCCCAGGCCAAATCAAACACCGAATTAACGGTTACCACATGTTGATTGGC  
TTTCTCTACTGCCTCTACATGGGAATTCAGTTGGCAAAAATTCGGCTTGCCTCGAATATTAGGAGCA  
AAATGTCAACCGCTGCTGATATGGCATCTGGGAAAAGTGTGGATTCTGAATGGGAGGCTTTCTTCTCCTT  
ATGGCATCTGGGAAAAGTGTGGATTCTGAATGGGAGGCTTTCTTCTCCTTTACACCAGTGTCAACTGGA  
CTGAATGGGAGGCTTTCTTCTCCTTTACACCAGTGTCAACTGGAGCACATCAGAGACACAAGGGAAGAT  
AAGCTTTATGTCGCTTGGTCTGGATCTGTTGAGTAAGGTTTCTATCTCTGGGTCTGGAGTCTTTGGAG  
TATCACCTTATGTCGACACTGATACCACGTACTAGTAATCATGGTGTATAATGATCTTATCAACCTT  
TAACCGTTAATTCGGTGTGTTGATTTGGCCTGGGCTCTCGTCGTACCTTACGCTGGCAGGGCAGTTTCA  
TAAAACCTCACAGTGTCCGTAAGGACTTTGTGCACTCCGTTAAGCGTACGCTTCAACGGAGGCGCGATC  
AAGGATGATTTGGGGATGTGATGTCGGAGTTGCAACTGTTTGCAGCTGCGTTCAAGGGGGTTAGCGAT  
TGGGGATGTGTCGGAGTTGCAACTGTTTGCAGCTGCGTTCAAGGGGGTTAGCGATGCCATCACTG  
GTTAGTGTGCATCAATTGATATCTTGGGTAAGTCTCCGATCGATCCCCAATAGTTGATTGGGCGGCTA  
AGTTGCATCTTGGAGCCCACTTACTCAGCTTTGGAGCATTACAACAACCAGTTAATGGTGTGGA  
ATGGTGTGGAGGCGCGGTCTGACCAGATCGATTGAGTGGCATGACCGCCCTACACTGTGATGTGTTGCA  
ATGTGCTCAACCTGCGCTAACGTGCTTAAATATTATAATTGGGACCCCCACTTCAAATTAGTGATCAATC  
GATTCGGCCATTTGTCTCCAGGCAAATCGACATTTTGAATTTCAATCAAGAAACTGCTGGATGGAGCACA  
ATGGTGCAAAACTTGGGGTGGTGTGCAACTGATTTCAATGTCCTGGGATCCCTGATGGTTGGCCAGA  
ATGATATCTGTGGTCACTCCAAAGAGCGTGGGGTGTAAAGAAAATTTCAAACACTGCTTTGATCACC  
TAATAGGGAAAGGGTCTGTCGCATCAGCAGCTTCCCGAAACTGGTGTGCTGGTGGGAACCATCCAATA  
CACTCCAAGGTACATTCCGGGCGCCAAGGCCAGCAAACCTGACCCCCCTTGGAGGCCACCAGCCTCAGT  
CTGCCTTTTCAAGTATGACTTTCCAGGCGGCGCAGCGTTGGAATCGATCCTTTGATGTTGTGAGGACTTT  
GGTTGTTGACCATGATCCCGGTGAGGGATATGGGGCACCTTGGGTGCGATGCTCCAAGCGAAGCGGGCTG  
AGAGCAAAGACAGAAAAGCAGGGGTTGTTCAATCTGGTCCCAGGATGGGATGGTTCCGTCAGTCGAGCC  
AGACTGTTTAGCTGAATGTTGCCAGTTCACCGTTGATGGTGAAGTTTTGGTTCTTCCGACAGGAT  
TCAAGAAGCAGAGTATCGCAGCAATGGCGTACCAGAATGGGTTGGTGAAGTCAAGTCAAGTCAAGTGTAAA  
CAGCAACAGCTCCATCGAAAGCGCGGTGACCGTCTCTGCCACAATGCCAGGGTAAGTATGACGTCCCC  
TTAACTGGCACTTTATGTGGGTAACGGTTCGAGAGGCGGAGCATCTCGCAATAAGGTAGCCACCCATAAA  
TTGCCACACCCCGGTGGCCCGTAAATGACGTCAACCTCAGTCTTAAAATCACGCGGGCGGGAACCAACCA  
CCATCATATCCATCCCACCATCCACCGCGCATTTTATAATATTTGGTCCCAGGCTGCTCATTGGCCCATC  
ATTACCGCGCATTTTATAATATTTGGTCCCAGGCTGCTCATTGGCCCATCGACTCTTGGCCACACCCCGG  
GCTCCCCCGTCTCTCCACATATTGCAAAGTGGAACTACCAGGGAGCAGGGGCCCTCACTTTAGCTTC  
ACAATCAAGCGTGACCGACTGATGCTGTAACGTACGCGGCGGCCCTGTGGCTCAACAATCCCAATCC  
AATCAGGTTAGCAAAAGTGGAAATGAGACCCCTCAATGAAAGCTGGGAGGAGTGGAAAGGGTTCGGGCAC  
GTCCAATCATCAGGGCCAAATCCCTCAGACCACGCCATACTTACGCTAGATCTCGCTGAACTCTCGCGC  
GCCCTTTACCTACCCTCCAGGTAATCACCCCAAACCTGAGCTGGACCAACAATTGATTGGTTCCAC  
TTTAAATACCCACACCAATGTCGAGCACACAGGCTCGGCTATGCGCTCCAAAATGCAGCCACAGCCAA  
CACTTTGTAACCCCTCCACCACTTGGCCTATGACCCCTATTAATACTACTCCTCCCGCCACACCATA  
TTATGTGGTAAGGCTGACTATTTATGTACAATTCAGAGAATTTATCCTAAAAGACCCTCTAAATAAATAA  
GTTCTCCCCCTCAGGCGGCACCAACCCCTACCCCTTCCAATACTACCGTATTAGAAAGGCT  
ATTAGGGCATGGGGGGAAAGGGTACGAACTGACCCCTTCCCTCCGTTGATTGTTCTGTAGCATTCTT  
GGCATGGGGGGAAAGGGTACGAACTGGCCCCCTTCTCCGTGGATTGTTCTGTAGCATTCTTCAAAA

CHICKEN\_ANEMIA\_VIRUS\_PROBE01  
CHICKEN\_ANEMIA\_VIRUS\_PROBE02  
ALPHACORONAVIRUS\_1\_PROBE01  
ALPHACORONAVIRUS\_1\_PROBE02  
ALPHACORONAVIRUS\_1\_PROBE03  
ALPHACORONAVIRUS\_1\_PROBE04  
ALPHACORONAVIRUS\_1\_PROBE05  
ALPHACORONAVIRUS\_1\_PROBE06  
ALPHACORONAVIRUS\_1\_PROBE07  
ALPHACORONAVIRUS\_1\_PROBE08  
ALPHACORONAVIRUS\_1\_PROBE09  
ALPHACORONAVIRUS\_1\_PROBE10  
ALPHACORONAVIRUS\_1\_PROBE11  
ALPHACORONAVIRUS\_1\_PROBE12  
ALPHACORONAVIRUS\_1\_PROBE13  
ALPHACORONAVIRUS\_1\_PROBE14  
ALPHACORONAVIRUS\_1\_PROBE15  
ALPHACORONAVIRUS\_1\_PROBE16  
ALPHACORONAVIRUS\_1\_PROBE17  
ALPHACORONAVIRUS\_1\_PROBE18  
ALPHACORONAVIRUS\_1\_PROBE19  
ALPHACORONAVIRUS\_1\_PROBE20  
ALPHACORONAVIRUS\_1\_PROBE21  
ALPHACORONAVIRUS\_1\_PROBE22  
ALPHACORONAVIRUS\_1\_PROBE23  
ALPHACORONAVIRUS\_1\_PROBE24  
ALPHACORONAVIRUS\_1\_PROBE25  
ALPHACORONAVIRUS\_1\_PROBE26  
ALPHACORONAVIRUS\_1\_PROBE27  
ALPHACORONAVIRUS\_1\_PROBE28\*  
PORCINE\_EPIDEMIC\_DIARRHEA\_VIRUS\_PROBE01  
PORCINE\_EPIDEMIC\_DIARRHEA\_VIRUS\_PROBE02  
PORCINE\_EPIDEMIC\_DIARRHEA\_VIRUS\_PROBE03  
PORCINE\_EPIDEMIC\_DIARRHEA\_VIRUS\_PROBE04  
PORCINE\_EPIDEMIC\_DIARRHEA\_VIRUS\_PROBE05  
PORCINE\_EPIDEMIC\_DIARRHEA\_VIRUS\_PROBE06  
PORCINE\_EPIDEMIC\_DIARRHEA\_VIRUS\_PROBE07  
PORCINE\_EPIDEMIC\_DIARRHEA\_VIRUS\_PROBE08  
BETACORONAVIRUS\_1\_PROBE01  
BETACORONAVIRUS\_1\_PROBE02  
BETACORONAVIRUS\_1\_PROBE03  
BETACORONAVIRUS\_1\_PROBE04  
BETACORONAVIRUS\_1\_PROBE05  
BETACORONAVIRUS\_1\_PROBE06

TCAAGTCCGGCACATTCTTGAACCAGTGCTTTCTGAATTGTCCGCAGTTGCAGATCTTAGCGTGGGAGC  
AACCAGTGCTTTCTGAATTGTCCGCAGTTGCAGATCTTAGCGTGGGAGCGCGAGCATTTCGCGCAGCCACA  
AGATGTTAAAATCAAGACAATCTGGTTTTCAAAGCTGTAAGCAATTTACTTTTCAGACTTGTGTACAGTAC  
TAGCTTATCTTCAAAGCAATAACCATGTGCATGGTATGGACAATACTTCAAAAGTAAACTCTGTGAGT  
TAGAGACCGATGGTACACATTAGCCAAATGTGGGTAATGCTTGGCACTGTTCCATTGGCAACGAGATC  
TCATCCACCAGCCATTTAAATCCTTCAGCATAAAGATTTCCCTGATAGCAAAGTAAAGAGTGACACCACT  
CTGAGAACGATGTATGACAACCAATATTCAATCTTTTATCTTTTGGTGTGCACCAACCACTCTAAGATA  
CACGAGAATTAGAACGACCGCGTCTCTGGTGGATTCTCTCCCAGCTGACACGTTGTCCCTGAGAGGC  
ATTGCTTTCCAACAAGTGTGTAGACAATAGTCTACTAGGTAATGCGACCATTACGTATTTTGGTAAATG  
ACTCAAGATGTCTTCCTTCGACAAGATGTTGCATATCTTTGTCATGGTAAATCTGAGTCCAATTGGAAG  
CAACCTCAGATGGCCGAGTGTATGCATTAATCTGCTCAAGGAATTGTCAGTCTTAGGATCATCTTTGG  
TCCAATAACCAATTTGTTGATCCTTATTACCTATTTTAGGGGAACAAAGTCTCTCGGACATAAGTCCCA  
TTCTTCAAGCGCTAACACAAAGAATTGCATTAAGTTTTCAGGGTTGAAAGACCACCAAGACTTAGTCTCT  
TGAGATTGAGAATGTGATTAAGTAATAACCTTTCAATAAATTGGAGTCTACCAATTAGTAAGATTAA  
TACGTTCTTAGATTTGGAACGAGATCTTTGTTGTTTTCTGTGTCAACACCTAACTTTTTGAGTGCAGA  
CTGGTTAAGGGTAAATGGGGTTGAAGAATGAAAGAGGTATATCATTATTCTCCGGCCACGAGAATTAGA  
CCAAAATGCTTCGTCCGGGATTATATGCCTTGGTTGCATAAAGGTCTTATAGGCATCATATGCATGGCG  
GTGTTACGTTAATTGTATGCATTATTATTGTTGACTCAAAACTGTGTGGTATGAACATAACAACAA  
CAGGTAGTACTATAATAGTCTTACCCAAATTGCAACATACCATGCACAATTAATAACATTTAGCAATGC  
CAGTAGTTCGAGTCTTAGAGCAGTTGACCAACCTCTGTAGGGTAATAACCACCAACTACACT  
CAGTACGTGCTTGTGTTGAGTAATCACCAGCTTTAGATTTTACGTAGTAAGCCATCCTGTGGCAGTAGT  
TATATAGCTGAACAGATCTCACAATAACATCATCCAAAGTGCAAACGTTACAACCTGCACCTGCAACACT  
TAAGATCGCTCCGTTGAAGCATGACTACAATCAGACGCTGTACTATTGCGACATGACAAATCTGTATC  
CCCATTAAAGGCATCATATAAGAATAATATGATGTAACACAAGCGCAACCAAAACCCGGAGCAGTCTTCA  
TTACCGAACTCACATCTACCCTCTTTATATGTGAAGAAGTCATGCTCAGCAACAGCACCAGAATCTTTAA  
GAAGCACCCTTTAGTAATCTGGTTTCTGCTAAACTCTATATAAGATATTAAGTCATTGACAGTTTT  
GTGATATGCGTGCGACAACATTAGAAGTCGCTGGCACGCTTGTAGACCTTTGGTGGTTAATCCTGTTTA  
TCATCAAACCTGAGAGCAAATCACTAGTTGCATGACGCTTAAAGAGCATTCACTACTGGTGATATTGA  
TATGATGTTGATAATGATACAAAAGCAAATGATTGCAAACCTTGGTTCATCATTGAATATGATGGTG  
TTATATGCATTTGTAAGGGCTCACCACCTACTACCACCACAGAATCTAGTTTGACTTGCAATTGGGGTAG  
GTGTATAAACTGCGCTATTACACAACCGGTGACAAGTGAAGCACAGATTAACCAATTGGACGAAGGTAAT  
AGTTCACCTTGAGGAATTTACCTAGACAAGCAACATCCTTGTGTAGATGTCAAAGCAGCAGATACACATG  
TAGCCCATGCGTCAAAAAGTGACAGTGCCAACACAAGAGGGCAAAGTATCCATAGAATAGCCATCTTGAC  
ACAGTGTAATGGTAAATTGTCTAGTGTCAACACAGAAAGAACTAAACCCATTGATAGTAGTGTGATGATG  
GCCACAACCGAATGCTATTGACAAAATACATTATCCACAGCATAAGAGTGTGCAAGCCATAAGGATGCT  
CACTACCGAAGCGAGGGTAAACAAAAGATCTATGGTACAAGCACCAGCCAAAAGGCTGGTTGAAACACA  
TAAGCAGGAAAAAGAGTACGAAAAGCAAAGTATAACATTAACCTACTAGACCATTATCATTCACTAATTG  
CTAATGTGACAACACCAACTATACCTTGTCAACCATTGCATCACAGAACTTAACGCATTTAAGCATAGC  
TGTTAAAATAGTATTAATCTTTGTCAAGCTCATAAAAACTTTAATAGTCTTAGGTGTGCTTGCAT  
CTGAGATATCACCACCATCGTCAACATCATCCATTTTAAAACATCAAATTTATTCTCATCAACCAATAA  
CCAACAAAACGCCAAGCAATATAATAGGTAAGGGGTATACACACAAATTGGACCATCAACATTCGCAAG  
GAACTGTTAACATCAGCTCATATGAAATGGCCTGATATAAACCAGAGGGCACTCTATAATAAAAACTT  
TGCAAAGGTGCGACCTTAGCAACAGTAACTGGCAAATCTGACAAAAGAAATAGCCGATCTAG  
TTGTGGCAGTAAGAGTATGATGGTCTCAATAATAGGCTAACATACATCTTACCCTCATATCTACACA

BETACORONAVIRUS\_1\_PROBE07  
BETACORONAVIRUS\_1\_PROBE08  
BETACORONAVIRUS\_1\_PROBE09  
BETACORONAVIRUS\_1\_PROBE10  
HUMAN\_CORONAVIRUS\_HKU1\_PROBE01  
HUMAN\_CORONAVIRUS\_HKU1\_PROBE02  
HUMAN\_CORONAVIRUS\_HKU1\_PROBE03  
HUMAN\_CORONAVIRUS\_HKU1\_PROBE04  
HUMAN\_CORONAVIRUS\_HKU1\_PROBE05  
HUMAN\_CORONAVIRUS\_HKU1\_PROBE06  
HUMAN\_CORONAVIRUS\_HKU1\_PROBE07  
HUMAN\_CORONAVIRUS\_HKU1\_PROBE08  
MURINE\_CORONAVIRUS\_PROBE01  
MURINE\_CORONAVIRUS\_PROBE02  
MURINE\_CORONAVIRUS\_PROBE03  
MURINE\_CORONAVIRUS\_PROBE04  
MURINE\_CORONAVIRUS\_PROBE05  
MURINE\_CORONAVIRUS\_PROBE06  
MURINE\_CORONAVIRUS\_PROBE07  
SARS\_CORONAVIRUS\_PROBE01  
SARS\_CORONAVIRUS\_PROBE02  
SARS\_CORONAVIRUS\_PROBE03  
SARS\_CORONAVIRUS\_PROBE04  
SARS\_CORONAVIRUS\_PROBE05  
SARS\_CORONAVIRUS\_PROBE06  
SARS\_CORONAVIRUS\_PROBE07  
SARS\_CORONAVIRUS\_PROBE08  
AVIAN\_CORONAVIRUS\_PROBE01  
AVIAN\_CORONAVIRUS\_PROBE02  
AVIAN\_CORONAVIRUS\_PROBE03  
AVIAN\_CORONAVIRUS\_PROBE04  
AVIAN\_CORONAVIRUS\_PROBE05  
AVIAN\_CORONAVIRUS\_PROBE06  
AVIAN\_CORONAVIRUS\_PROBE07  
AVIAN\_CORONAVIRUS\_PROBE08  
AVIAN\_CORONAVIRUS\_PROBE09  
AVIAN\_CORONAVIRUS\_PROBE10  
AVIAN\_CORONAVIRUS\_PROBE11  
AVIAN\_CORONAVIRUS\_PROBE12  
AVIAN\_CORONAVIRUS\_PROBE13  
BOVINE\_TOROVIRUS\_PROBE01  
BOVINE\_TOROVIRUS\_PROBE02  
BOVINE\_TOROVIRUS\_PROBE03  
BOVINE\_TOROVIRUS\_PROBE04

CTGCTGGTTGAGAAGTAGCAGTTTGCTTGGGTTGAGCTCTCCTACCTCTGGTTTGAAAATTTGAAGACTG  
CATCAAAGTCCCAGACAAATTCTGTACTTTGGCCAACTCTAGTCTTGATCCAAAGAAAAATGCACCTGC  
CACTGCCTACACAACCCAAAACAGAAGAAAAATTAATATCATCTACATTAATAATTTATGCCAGTCTTAAG  
TTGCATTAATAGGCTCAGGATCACAAGTGCATGCACATTGTATAGGATTAACAAAGTGCAGATAAGATGT  
TATTAAGAACATCCATAGTAAACCCCAACCATTAACTTCTATATTGTACATTAAGAGAAAAATGGTATGCC  
ACGGTAAACGATAGTTACCAACTTTAGACTTAAACAAAACAGCAAAACCCTATTAACATCTAACTTATC  
TAAGCTGTTGAGAGACATAAGCATTAAAGCAGTTAAACGACCATTAATAAGCCTATCAATCTGAACCTG  
TATCAATACACATAAGATTATTGGTCTCTGGATTAATAACTCCACCAACTGCCAGTTCTAATAAAAAAGCCG  
ACCAATATCCTTTTGCTTCAAGAGGGGTTACTCCGAAAGCAATGGGAACCTTGACCATCTGAAAATTT  
TAAATCTATGATAAGGATTAATAATTAACACCCTCATAAAAAATAATTTGATCACCTTCGCCAGTGAATT  
TACCAAGCTTTAACATTTACGATTACCAAAATTTGAGAAGGTCCTCTTTACCAAAACACTGTTGAAC  
TTTTAATTTTTAAATTAATATGGTTACAATCAGAACGACTATCACAAATAAAAACCAGTCATGGTT  
GCTTTGTCTTATGGAGGCAAATAGCCTTTGAGGTAAGCTTAAACAAATATTCTAAGGACACAGCCTTATA  
ACCCATAGGCTGGCCAAGAGGAACTAACATTATTATAAAGAAATGCACCCTGCTGGGCAATACAGGAAAC  
TTACGCCACTTGAATAGCTGCAACGCTAAACAACATGTGCGCAAATCAAGCAGTGCCTAGCAGACGC  
CAGACAAAAGAAACCCGGTGCCTAGCTTAACACCTTGCATGTAGAGGTGCCACGAATAATAGTGGCTGT  
AGGTCTTAGGTAAGACCATACTAAAAGTATATAAAATTTGGCGCAATGAATAATGCACCTGTCATCCTC  
GGCCACGAATAATAGTGGCTGTAGTGTATGGTAATCCTCAATAATGGGTCTAACATACACGGTACCTTT  
GAGTCAATGCAAGATACCTGCAAGTGAGATCAAGACCCGGATCCTTAGCAGTGTGCCAACATCCAAGGT  
TGTCAGTTGAATCTGTGGGTCCACCAATGTAATGCGGGGGCACTACGTTGGTTTGATTGGGGTCCATT  
TACGCAGGTAAGCGTAAACTCATCCGAACTCATGATCAACATCCCTATTTCTATAGGACACTCATA  
CAGTACTAGTGCCTGTGCCGCACGGTGAAGACGGGCTGCACTTACACCGCAAACCCGGTTTAAAAACGT  
CCCCTTAATAAGTGGTTTTGCGAGATCAGCATCCATATGGGACTCAGCAGCCAATGCCCTAGTCAAAGT  
GAGCTGTGAACCAAGACGCAGTATTATTGGGTAACCTTGGGGTGGCGCTGTTTTGCCCTTGCCCCATT  
TGCTGTGCCGCACGGTGAAGACGGGCTGCACTTACACCGCAAACCCGGTTTAAAAACGTTGATGCATC  
CCCCGAAATTTCTTGGGTTTGTCTGGACCAGTCTCCCAATGCTTGAGTGACGTTGTAAGTGTGTTTGT  
GGTATCCAGTTGAAACAACAAAAGGAACACCATCTACAAATATTTTTCTACTAGTGGTCCAAAACCTTGT  
TTATGGATGGTGTATTGTTTATACATATGACACAGACTGAGAGAAAACCGTGGTACATTCCTACTTGGTT  
ATAACTTATAAAGTTATGAGAGAAGTTAAAGCCCTGGCTATTTTTGTTAATGGTACTGCACAAGATGTTA  
ATTTTTGTTAATGGTACTGCACAAGATGTTATTTGTGTGATGGATCACCTAGAGGCTTGTAGCATGCCA  
GATAAACCCACCTAAAACCTGTGTGGGAAGTCTTTTCGACAAATATACTTATAACAAGGAATTGGTGGTGAC  
TACAGTTATGTTGGTGTAAACTTTGATTTTGGTACAGCTATGTATAGTGTGAAAACCTGCACCTATGCAGT  
ACTTAATTTTACTGGTTATAATGTATCCAATTTGGGTGGGTTTGTATTTGCCCTTGTCTACCCAAAAAT  
AGAATGATACTTTCTTTGCACTTCCACACAGTTATATGAGCCTAAGCTTTTATCATATTCAGAAGTGGT  
GAGCACTCTGTGGTATTGTTAGAACATGGCTACCATTACCACAGAAACCATATCGCATGGATTGCGACTT  
AGCGTCTTGACTGGTCAGCCTTATAAGCTGCTAATTGAAGAGATGCTACGTAAGTTGATAATGCAGTCAA  
CACAACAACAGTGCATGAAAAACCCCATCCTAATATTAAGATGAATATTAACAAGCAAAACCAATTGC  
TAAAATTAAGTGTGAACCTGTATTAATAGCTTCCGCATATTGCAGTAAACCATTATCTTCATTCTCATT  
TAACACCTAGAGTAACAACCTTTGTCAAAAAGTAAGTCTTCAATAGTAGACCTACCTTGATTTGTGCCAA  
GACAAATTGTGGGAATGAACTCACATTACATACAAGTGACAAGATTATCGTCAGGCAACACAACCTGCAC  
TATTGAACATGGGCGGAAAACCTGGGTTACGTTGTCTACGGAAATCCAGGAGGAAAACCTGATGGGTAAGT  
AAATGCTCTGTACAGCTTGAACCTGGAACCTGTTATATTCATTGTGTCCATACAATATGACTTTGTGGGATA  
ATGTAATAATTAACATCCAACTTAACATTAACATTAAGTTAGTTGAAAATTTGGTAGGCAAAAGACCCAGGC  
TATACTGCTTACGTGGTGAATAATTCACACCCTCATAAAAAACCTTCTCCACACCACAATTAATAATC

BOVINE\_TOROVIRUS\_PROBE05  
BOVINE\_TOROVIRUS\_PROBE06  
EQUINE\_TOROVIRUS\_PROBE01  
EQUINE\_TOROVIRUS\_PROBE02  
EQUINE\_TOROVIRUS\_PROBE03  
EQUINE\_TOROVIRUS\_PROBE04  
EQUINE\_TOROVIRUS\_PROBE05  
EQUINE\_TOROVIRUS\_PROBE06  
HUMAN\_TOROVIRUS\_PROBE01  
HUMAN\_TOROVIRUS\_PROBE02  
HUMAN\_TOROVIRUS\_PROBE03  
HUMAN\_TOROVIRUS\_PROBE04  
HUMAN\_TOROVIRUS\_PROBE06  
HUMAN\_TOROVIRUS\_PROBE07  
HUMAN\_TOROVIRUS\_PROBE08  
HUMAN\_TOROVIRUS\_PROBE09  
PORCINE\_TOROVIRUS\_PROBE01  
PORCINE\_TOROVIRUS\_PROBE02  
PORCINE\_TOROVIRUS\_PROBE03  
PORCINE\_TOROVIRUS\_PROBE04  
PORCINE\_TOROVIRUS\_PROBE05  
PORCINE\_TOROVIRUS\_PROBE06  
PORCINE\_TOROVIRUS\_PROBE07  
PORCINE\_TOROVIRUS\_PROBE08  
DENGUE\_VIRUS\_PROBE01  
DENGUE\_VIRUS\_PROBE02  
DENGUE\_VIRUS\_PROBE03  
DENGUE\_VIRUS\_PROBE04  
DENGUE\_VIRUS\_PROBE05  
DENGUE\_VIRUS\_PROBE06  
DENGUE\_VIRUS\_PROBE07  
DENGUE\_VIRUS\_PROBE08  
DENGUE\_VIRUS\_PROBE09  
JAPANESE\_ENCEPHALITIS\_VIRUS\_PROBE01  
JAPANESE\_ENCEPHALITIS\_VIRUS\_PROBE02  
JAPANESE\_ENCEPHALITIS\_VIRUS\_PROBE03  
JAPANESE\_ENCEPHALITIS\_VIRUS\_PROBE04  
JAPANESE\_ENCEPHALITIS\_VIRUS\_PROBE05  
JAPANESE\_ENCEPHALITIS\_VIRUS\_PROBE06  
WEST\_NILE\_VIRUS\_PROBE01  
WEST\_NILE\_VIRUS\_PROBE02  
WEST\_NILE\_VIRUS\_PROBE03  
WEST\_NILE\_VIRUS\_PROBE04

TACACACACCATTGGCCATATAGGGCCGTCCAATAGAACAACCAGGTTTACCCACCCTAGCATGGGTA  
CAAAAGGCACATTTGGGGACGCCTGATTATATTGGCGCCTACTACCGCGTTGCCGTTATTTGACGATT  
CTACACACGTTCCGGGAGGGGAAAGTGCACCTTTCCGGAGGGCGGTTTGACCCGCTTGTAAGTACTAAATGC  
CGGGTGTTCGGTAATGTCAAGGGACTCAAATCCACAACAGATGACATCTTCATCAAATTCAGCAGCAGCTT  
AGTAGTTTAGAAAAGATGTAATCCAAAAAGTATGTTTACTACTTTAGTCCCAAATAAGGGCCTGCAGCA  
CAACTGATAACTTTTGTCCATATCTAAGGGTATTCTGGTAAAGTAGTAGTTGTGGATGTTTCGTTCC  
AGAACGACGTCTAAATTGTTGTTTCTTTTTCTTAAAACTCTATAAGCCAAATTATTAAGTGGAAAAA  
GGCTATACCTCGTTAGTCGCTTAAGCGCCTGCCCGTAGGGAGGTGAGGTTTAAAAAGGCTAAAGAACAAA  
AGAATGGTGGTTTACACGCTTCTGCTATTGCATCATCAGACTCGTTGCCTTCAGACCAAATAGACTGTAT  
CAAAAAGATAATCACAACATTATCATGAGACTCAGCTAAACCTATGTATGGTGTTCATCATTAAACCC  
GTGATTGAACCTTTGGTACAATCAGATCTACTATCACCATAAACAACAATTAATGTAATATATAATGG  
TATCAACACCCTCATCATAACAATACTACTGATTACGTGGTGATAAATTAACACCATTATAATAAACTTT  
GTAAAACAAACCTGGACCAAGTTGGCAGATCCTACTAAGCAAAGCAAAGTAGGGTTGTAGGCAAGTA  
TAGAACGTGCTTTTGTAGTTGTATAAGCTTGATAACAACGTAAAATTGTTGCCATTTGATTAAGCTTAATATT  
TTTTGTCCTAATTTTTTCAATAAATCATCATCATCCATGTTTTTTTCAATACATTATAATAATCATTCAA  
GTTTAGTTTTATTTGACAATTTAATTGTCGTATAGAAAAAGTTTATTATAATGGTGTTAATTTATCACC  
AAAAGCACGTTCTAGTTTTACAACACTACAAGATGTTGTGTGCTACTAATAAATACTTGCCTAACAC  
TGCCTGAAGAATTAAGACCACGCTCTTTGATTTGAATGCGTGATCTATTCTGACGACTGCGATTCTGATT  
GGCGTCTATTAGCACGCTGTAGGGTGCCTGAAGAATTAAGACCACGCTTTTGTATTTGAATGCGTGATCT  
TTTACCGGCTACTGGGCACTTACTGTAATGCCACTATTTAGTTTTAGTTATGTTAATATGATGTTTTG  
GTTATTTTTAAGTTATTTGATAAGCTTTTCAACACTGACATTTTTTCAACATTTGGAGGGTCTGAAAA  
TTATGAGGGCGTCAACTTTTACCACATAGAAATTATACCTGTTACCAAGAAGGCTCCTCTGGTTGGGTT  
TATTCTATGGCATCAACATCTCGCTGTATTAAGCTTATTAATTTAGATCCACCACTAATTTTACCACT  
TCCATTTGGTTATTATTATGAGTACCATCATTTACCATGGATTTTACACTAATGGAACATCAGGTTTA  
TCACCAATTTGGAGGGTCTGAAAAATTTTTGGCTTTTTCTCAGCCTTACATCTTTGGCAATTGCTTATT  
AAAGTGTTGGGCGTATCATCTCATCCCCCTTTGGCTGAGAATACCAACAGTGTAACCAACATAGAAT  
TAGGAGTAGGAAACAGAGACTTTGTGGAAGGAGTCTCAGGTGGAGCATGGGTCGACCTGGTGCTAGAACA  
CTTTGGGGACAGCTACATAGTAGAGTGTGGAAACAGCGCATTAACTCCATTGGTTCAAGAAAGGG  
AGTTCCATTGGCAAGATGTTTGTAGTCCACATACAGAGGTGCAAAACGAATGGCCATTCTAGGTGAAACAG  
AACAGCTTGGGATTTTGGTTCCGTTGGTGGACTGTTACATCATTGGGAAAGGCTGTGCACCAGGTTTTT  
AGTGCAAAGTCCGTATGGAGAAATTGAGAATCAAGGGAATGTCATACACGATGTGTTCAAGAAAGTTTTT  
ATGTGTTCAAGAAAGTTTTCAATTGACAAAGAGATGGCAGAAACACAGCATGGGACAACAGTGGTGAAG  
AACCATGGCCAGGGAAAACCACTTTGGATTTGAACTGACTAAGACAACAGCCAAGGAAGTGGCTCTG  
GCTCCGTGTAAGTCCCCATAGAGATAAGAGATGTAACAAGGAAAAAGTGGTTGGGCGTATCATCTCAT  
ATCGGCCTAAAAGCGCCTTGGTCCGGGCTAATGCTGTAACCTGAAGAACGTGATAAGAGCCAGCAGCAA  
AATGAAACATCTTACTAGTTTCAAACGAGAATTGGAACACTCATTGACGCCGTGAACAAGCGGGGCGAGA  
TCCGTGTGCGGTCCAAACACATGGGGAGAGTTCCTAGTGAATAAAAAAGAGGCTTGGCTGGATTCAACGA  
TGAGAACTGGATCATAAGGAATCCTGGCTATGCTTTCCTGGCGGCGACACTTGGCTGGATGCTTGGCAGT  
CGATGGCTCATACTGACGCCATCGTGCAGGGTGACCGTCAAGGAGGAACCAGTCCCAGAAGCTTACACC  
GACAAGACTCCAATCACAAGCTGGACAGACGTTCCGTATGTGGGAAAGCGTGAGGACATCTGGTGTGGTA  
GTGTTAGCAGGGCTAGCAGCGGAACAACCACGTTTGTGTCGTTGTGAATGTTATGGCTCTCAGTATCAT  
TTGCTGAAGAGCATCTGGCAGTTCTCCAGGGCCATTCTGTGAGCTCTTCTCCTTCTGCGCAGTGGC  
TCAGTATAGCTGGCATGCTGCTTGGCTGCCACTTGGCAAGGACCTCCTGGGTGGGCAAGAACAC  
TGCAAGTGCTTCCCATGTCTTCCCATGAAGTGCTCAGGCATCTTCCAGAACCCTCAATGAGCCCTAT

WEST\_NILE\_VIRUS\_PROBE05  
WEST\_NILE\_VIRUS\_PROBE06  
WEST\_NILE\_VIRUS\_PROBE07  
WEST\_NILE\_VIRUS\_PROBE08  
YELLOW\_FEVER\_VIRUS\_PROBE01  
YELLOW\_FEVER\_VIRUS\_PROBE02  
YELLOW\_FEVER\_VIRUS\_PROBE03  
YELLOW\_FEVER\_VIRUS\_PROBE04  
YELLOW\_FEVER\_VIRUS\_PROBE05  
YELLOW\_FEVER\_VIRUS\_PROBE06  
YELLOW\_FEVER\_VIRUS\_PROBE07  
ZIKA\_VIRUS\_PROBE01  
ZIKA\_VIRUS\_PROBE02  
ZIKA\_VIRUS\_PROBE03  
ZIKA\_VIRUS\_PROBE04  
ZIKA\_VIRUS\_PROBE05  
ZIKA\_VIRUS\_PROBE06  
ZIKA\_VIRUS\_PROBE07  
ZIKA\_VIRUS\_PROBE08  
ZIKA\_VIRUS\_PROBE09  
ZIKA\_VIRUS\_PROBE10  
ZIKA\_VIRUS\_PROBE11  
HEPATITIS\_C\_VIRUS\_PROBE01  
HEPATITIS\_C\_VIRUS\_PROBE02  
HEPATITIS\_C\_VIRUS\_PROBE03  
HEPATITIS\_C\_VIRUS\_PROBE04  
HEPATITIS\_C\_VIRUS\_PROBE05  
HEPATITIS\_C\_VIRUS\_PROBE06  
BORDER\_DISEASE\_VIRUS\_PROBE01  
BORDER\_DISEASE\_VIRUS\_PROBE02  
BORDER\_DISEASE\_VIRUS\_PROBE03  
BORDER\_DISEASE\_VIRUS\_PROBE04  
BORDER\_DISEASE\_VIRUS\_PROBE05  
BORDER\_DISEASE\_VIRUS\_PROBE06  
BORDER\_DISEASE\_VIRUS\_PROBE07  
BORDER\_DISEASE\_VIRUS\_PROBE08  
BORDER\_DISEASE\_VIRUS\_PROBE09  
BORDER\_DISEASE\_VIRUS\_PROBE10  
BORDER\_DISEASE\_VIRUS\_PROBE11  
BORDER\_DISEASE\_VIRUS\_PROBE12  
BORDER\_DISEASE\_VIRUS\_PROBE13  
BORDER\_DISEASE\_VIRUS\_PROBE14  
BORDER\_DISEASE\_VIRUS\_PROBE15  
BORDER\_DISEASE\_VIRUS\_PROBE16

CAGGAATTAGCACAATCATCAAGAGAAGGGAGAGCAGCAACATCCGGCGATCTTCGTTCTGGAACCTC  
AATGCTTTAGCAGTGGAGTGAGGACCGCTGTTGTCACAGCGTACAGTGACCAGGCTGTTGCCGGCCTCAA  
TGTTCTCCTGGTTGGTCCATCTCGCTTTGAGAAACGATGCCACCATAAACACTGGTTGATCTTGAAGGT  
CTGTTACCCTAACGGTGGAGGTTGACTTGTCCCCAGCATCCGGCTGCTAGCAGGAGAGCCGACACTCCAAC  
TTGGAACAGACCTGGACCTCAAGAGGTGTTCAAGGATTTATCTTTTCTTTTGTCAACATTTTGTGAC  
CTTGGCTGTTCTAAGGAAAGTCAAGAGAGTGGTGCCAGTTTGTATGAGAGGATTGTCCTCAAGGAAACGC  
TTGCCTACCTGTGGGAAGCAACATGACGCAACGAGTCGTGATTGCCCTACTGGTCTTGGCTGTTGGTCC  
TGACTTGCCTACGCATGAAAACCATGGTTTGAAGACCCGGCAAGAAAAATGGATGACTGGAAGAATGGGT  
ATCTGGAGGATGGGATTTATGGCATATTCCAGTCAACCTTCTTGGGGCCCTCCAGCGAGGAGTGGGAGT  
ACTGCTAAGCTGTGAGGCAGTGCAGGCTGGGACAGCCGACCTCCAGTTGCGAAAAACCTGGTTTCTGGG  
ATATTGACGCCAGGAAAGACCCGGAGTGGTCTCTGCTTTTCTCCAGAGGTCTGTGAGCACAGTTTGTCT  
TAGCCTTCCCTTGCACCATCCATCTCAGCTCTAGAGCTCCAGCAAGAGCCGTGTGGACGGCTCCCTTCC  
CCAGTCAAACCTGTGATGCGGGTGTCCCAGCCAGTGTGTGCATCAGCATACATCTTCTCTGTTGAT  
GGAGCTTGTGAAGTGGTGGGAGCAAAACGGAACCTTCCCAATTGTCATCCAGTTGAGGGTTTCCA  
TGGGGTCAAGGTCTGCATGTCCACCGCCATCTGGGCTGGGACCTTGCAGGGTCCATCTGTCCCTGCATAC  
AGACCATGCTCATAACCTGACGAGTGCCTTCTTGGGGTCTGGCACCCCTAGTGTCCACTTTTTCTTGAA  
CTGGGGTCAAGTGTGATGTCCACCGCCATCTGAGCTGGAACCTTGCAGGGTCCATCTGTCCCTGCGTA  
GCTTGTGAAGTGGTGGGAGCAGAACGGGACTTCTTCCCAATTGCTCCATCCAGTCGAGGGTTTCCACTC  
CTTCAGCGCAGCTTACCACAGCCCGCTGCCGGAGCCGAGATTACATCCTCCTCATATTTCACTGGCCT  
TGTGCCCTTCTCCATTTGGTGGTAATCAGAGCTTCACTCCAGATCAAACCTACTAATGCGGGTGTG  
GGATTGACAGGTAGTTCTCCAGTTGGAACCCAGTCAACTGGCACAGATGAACAAATGGCATTGGCCAT  
ACACGCCCTTCAATCAAGTTTATCCATTTTCAAGGCGACATTTCAAGTGGCCAGAGGACAGCCTTCCCTT  
TGGGCTCAGCCCGGGTACCCTTGGCCCTCTATGGCAATGAGGGTTGCGGGTGGGCGGGATGGCTCCTGT  
CACAGGACGTCAAGTCCCGGGTGGCGGTGAGATCGTTGGTGGAGTTACTTGTGCGCGCAGGGGCC  
GCATGTTGACTCGTCCGTCTCTGTGAGTGTATGACGCGGGTGTGCTTGGTATGAGCTCACGCCCGC  
CCAGCTGTCCGCTCCATCTCTCAAGGCAACTTGCACCGCAACCATGACTCCCTGACGCCGAGCTCATA  
ATCTCTCAAGGCAACTTGCACCGCAACCATGACTCCCTGACGCCGAGCTCATAGAGGCTAACCTCCTG  
CTGTGAGCCGAGGGCTCCAGGACTGCACCATGCTCGTGTGTGGCGACGACTTAGTCTGTATCTGTGAA  
TTTCTGGAGGTCCTTCCGTGAGATTGGCTTGTGTCTTGTTCATCAACCATATCCATGGATTTATGTTGTA  
GTTCTAATTTTTTCCCAATTATACCAATTGCTTCCCTAGCCAGGATGTCAATTTTGCAGCCCTTGCCT  
TTGCCAAGTGCCTGGGCACTCCTGTACATATCTTTTCAAGCCAAATACCGTGCAGGCTTCTGTTAACACC  
TAGGGAACAGCACTGGTACTTGGACTTCATAGCTGTTGTATGCCAGTTGAATTGGTTAGGGTGGTCTGT  
CACTAGTGTCCGTTGACCACTACCTTTTGGCCCTCGTGTATGACACCTCCCATCAGCTGTGACTAC  
AAAAACAGCTGCTCCTTCTGTTGATACCTGTCTCCAGTTCTCCCATCAACTGCATCATAAGTAGC  
CGTCAGGTGGCTTAGATCTACTATCCTTCTACTCTCTTGGGTGTGATCTTATGGCTCCCGCCTGAC  
ATGGTGTCTTACCTTATACCCGGGAATGACCACTGGTTTTTGTGTTGACCCACTTGTACATGACCTTCGT  
AGGGCACGCCTGTGGCTCGGCAGAAAGCATAAACCATGGTTAAGACATTTAACATACTATTGCCAGCACT  
ATTTCTTCTAGACTCAGGTGGCTTGTCTTGTGTGGTATAAGCCATCTTGTGTCTTGGCCTTAC  
GTAAGAGATCATAGTGGTAGTCTTGGAGCCAACCTGCTGTCTTGGCTCCTATAGTATCTCCCGGGCTT  
AGCTAGTTGGCGTCCAGTTCCCTGTGCAAGCTGGTATGCCGACACCATGGTCCGCCTTGGACTGTTCT  
TTGCTGTTATAGTCCCATGTATACTTTACAGCTAGTTGGCGTCCAGTTCCCTGTGCAAGCTGGTATGC  
CACATTTCAAGCCGGTGTCTACAACATACATAGTGTGGCAATGTGACTCCAGACTATTGCAATTGGT  
ATGCCGACACCATGTTCCCGTGTACTTGTCTCCGGGTGGGCACTGTAGCAGAAGTCTTCAAATGA  
GGTCCCTCTGTAATTTCTGGGTTTTCTGCTTCTCATGTAGGATTTGTATACCCTTACTGGCAAATTT

BOVINE\_VIRAL\_DIARRHEA\_VIRUS\_1\_PROBE01  
BOVINE\_VIRAL\_DIARRHEA\_VIRUS\_1\_PROBE02  
BOVINE\_VIRAL\_DIARRHEA\_VIRUS\_1\_PROBE03  
BOVINE\_VIRAL\_DIARRHEA\_VIRUS\_1\_PROBE04  
BOVINE\_VIRAL\_DIARRHEA\_VIRUS\_1\_PROBE05  
BOVINE\_VIRAL\_DIARRHEA\_VIRUS\_1\_PROBE06  
BOVINE\_VIRAL\_DIARRHEA\_VIRUS\_2\_PROBE01  
BOVINE\_VIRAL\_DIARRHEA\_VIRUS\_2\_PROBE02  
BOVINE\_VIRAL\_DIARRHEA\_VIRUS\_2\_PROBE03  
BOVINE\_VIRAL\_DIARRHEA\_VIRUS\_2\_PROBE04  
BOVINE\_VIRAL\_DIARRHEA\_VIRUS\_2\_PROBE05  
BOVINE\_VIRAL\_DIARRHEA\_VIRUS\_2\_PROBE06  
BOVINE\_VIRAL\_DIARRHEA\_VIRUS\_2\_PROBE07  
BOVINE\_VIRAL\_DIARRHEA\_VIRUS\_2\_PROBE08  
BOVINE\_VIRAL\_DIARRHEA\_VIRUS\_2\_PROBE09  
BOVINE\_VIRAL\_DIARRHEA\_VIRUS\_2\_PROBE10  
BOVINE\_VIRAL\_DIARRHEA\_VIRUS\_2\_PROBE11  
BOVINE\_VIRAL\_DIARRHEA\_VIRUS\_2\_PROBE12  
BOVINE\_VIRAL\_DIARRHEA\_VIRUS\_2\_PROBE13  
BOVINE\_VIRAL\_DIARRHEA\_VIRUS\_2\_PROBE14  
BOVINE\_VIRAL\_DIARRHEA\_VIRUS\_2\_PROBE15  
BOVINE\_VIRAL\_DIARRHEA\_VIRUS\_2\_PROBE16  
BOVINE\_VIRAL\_DIARRHEA\_VIRUS\_2\_PROBE17  
BOVINE\_VIRAL\_DIARRHEA\_VIRUS\_2\_PROBE18  
CLASSICAL\_SWINE\_FEVER\_VIRUS\_PROBE01  
CLASSICAL\_SWINE\_FEVER\_VIRUS\_PROBE02  
CLASSICAL\_SWINE\_FEVER\_VIRUS\_PROBE03  
CLASSICAL\_SWINE\_FEVER\_VIRUS\_PROBE04  
CLASSICAL\_SWINE\_FEVER\_VIRUS\_PROBE05  
CLASSICAL\_SWINE\_FEVER\_VIRUS\_PROBE06  
CLASSICAL\_SWINE\_FEVER\_VIRUS\_PROBE07  
CLASSICAL\_SWINE\_FEVER\_VIRUS\_PROBE08  
CLASSICAL\_SWINE\_FEVER\_VIRUS\_PROBE09  
CLASSICAL\_SWINE\_FEVER\_VIRUS\_PROBE10  
CLASSICAL\_SWINE\_FEVER\_VIRUS\_PROBE11  
HUMAN\_HERPES\_VIRUS\_4\_PROBE01  
HUMAN\_HERPES\_VIRUS\_4\_PROBE02  
HUMAN\_HERPES\_VIRUS\_4\_PROBE03  
HUMAN\_HERPES\_VIRUS\_4\_PROBE04  
HUMAN\_HERPES\_VIRUS\_4\_PROBE05  
HUMAN\_HERPES\_VIRUS\_4\_PROBE06  
HUMAN\_HERPES\_VIRUS\_4\_PROBE07  
HUMAN\_HERPESVIRUS\_8\_PROBE01  
HUMAN\_HERPESVIRUS\_8\_PROBE02

AGTAAAAACACTCAGGACGGCTTGTACCATAACAAAAACAAACCTCAGGAATCACGCAAGAACTGGAAA  
AGCAACAAAAAGAAAACACAGAAACCCGACAGACTAGAAAGGGGAAAATGAAAATAGTGCCCAAAGAA  
GCCCAAAGAATCTGAAAAGACAGCAAAACTAAACCTCCGGATGCTACAATAGTGGTGGAAGGAGTCAAA  
TTGTACAATATACCGCTAGGGGGCAACTATTTCTGAGAACTTGCCCGTACTGGCAACTAAAGTAAAAAT  
AAACACACCTACGGTGAGGTGACGTGGGAGCACTTGAGCGGGGGTAAATAGAAAGGGGGCAGCAGGCT  
ATGGGGGTTGGGACTGAGAGATACAAGTTAGGTCCCATAGTCAATCTGCTGCTGAGAAGGTTGAAAATTC  
TAGTAGTAGAAGGGTTAAGTACCAGGTGAAGAAGAAAAGCAAAAGTAAGGGGAAAAAACTCAAGATGG  
AACAAGAATAAGCCCCCTGAATCAAGAAAGAAATTGGAGAAGGCACTGCTGGCATGGGCCATCTTGGCAG  
ACAGAAAAAGATAGCAAAACAGACCCCTGACGCGACTATAGTAGTAGAAGGGGTTAAGTACCAGGTGA  
GAGTGGAAAGCAGACCGGATTTTATATTACCTTTTTTAAAAGCCGTGTTAATAAGCTGCATCAGTAGCCAA  
TGAGACTGGCCATTGCAAAAGTGATGTACAAGTGGGTAAAGCAAAAACAGTGGTGATACCCGGCTATGA  
ATGGGATTCATTCCAGGACCCCTGGCAGTGAGCTTTGACACCAAAGCATGGGATACACAAAGTACCAGT  
ACACAGGCTAGGGACAGGCTACAACCTGACAGGCTGCAACAAAGGCAAGAATTTCTCCTTCGCAGGTG  
TGCTGTTCAAGGAGCAGATTGCGGCAACATGCTGCAAGAGACCGGATACAGATACTCGATGGGGCAAC  
AGCAAGGGTAGGGACGGCCAAGTTGACAACCTGGTTAGGGAAAGCAATTAGGGATCCTTGGTAAGAAGTTG  
AACAGGAGTCTACATGGAATTTGGCCAGAGAAAATTTGCACCGGGTACCAACTCACTTAGCAACAGACT  
TTACCTAATACTGGAAATACATACTATATGCACAGGAAAATCATTAGATGAGGTGTCAGGAGGAGCAAT  
GGGCCATAGATGATGAGGAATGTAAAGGGCTGAAGAACTGTATCTCTTGTGCTAGGGAGAGTGAAGAATTT  
GAAATATACGGGGCACCCAAGGTGATCACTATCATAAAAGCTAGTACCCTAAACAAAAACAGGCACTGCA  
TTGGGCCCATAGTTAATGTTATCTTGAGAAGACTGAGGGTGATGCTGATGACAGTGGCCAGCAGGACT  
CAAATCAATGATTAAACCCTGGGAAAATATCAGATCAACTAGCAGAGATGGACACAAAAGAACATATAT  
AAACAAGCAGACCCCTGGATTGCATGAAGAACTAATGAAGGTTTTTACTGCTTAAAGATCCCAGAGCTG  
CAATTAGAAGCCGGGATAAACCGTAAGGGAGCAGCCGGCTATCAAGAGAGGAAGAACATAGGGGAAGTGC  
TTAGGTACTATGAAACAGCCATTTCCAAGAATGAGAAGAGAGACGTCAGCGACGACTGGGAAGCCGGAGA  
TCTGCTCACTGGCCTCGATTGCATTGTGGGCTGCCACGGCCCTACCCCTAGCATGACTGCTATGCCAC  
CCGTGTCTGTGGCCAGGTAGGTGGGACTCCTTGCATATTTTTCCGGCCAGATCCCATGCAAGCTCCT  
AAGCCACCTTGGTTTCATATGGCCACCAGTCTGGTCTAACACACACATATTTGCCAACATCCAGACTGA  
CAGCCTCGAACATTATCAAAGTAAAAGGTTCCCTACCGGCTGTCCTTTGGGCCAACTCTTTTGCCTCCA  
AGGGGTCTATATTGTACCAGTTACACCATCCATGTTTGTCCATTATGCTCTGTAACCTACAGCACGT  
ATAGGGCTTTTTCTAATTTCTTCTAGATTCTGGTGGTTTTATTCTTGTGTGGTACAGGCCGCTTGGGT  
TCCTGAGTTCCTGTTAGATTGAGTCTGGTTTGTGTCGACGCTTACAGGTTCTTCATGGGATTGAGGAAT  
CTGGTTTTATGGTCCCTATATCTTCAATTTACAACCGTGAAGCCAGCCAGGTTGTAACCGTAAACAGCAGG  
CTCCTTCCACTACAATCGTAGCGTCAGGTGGCTTAGTTCTGCTGTCCTTCTCATGCTCTTTGGGGCTAT  
TTTTAGGGGGCAGTCAAGCAGACAACCCAGAGAGAGCAGCAGAAAATCTGATAGGTGACCCCTCATCTC  
GGGACGGGGCCAGCTGATTGCCATCTCCCTACGCTAGACTTGATACTGTACGGAATATACAGGAG  
CGTTAACCCTGAGCCGTACAAGGCCACAATTTGGGACGCTTCTCATCCATGTTTCCAACCCTCTAAT  
CCCCCTGGCAACCTCCTGATTGTAGTTTTACAGGAGACCACACAGGGCGGCCCTCCCTTGGAGAGTTG  
ATCTCCCCCGTTCCCCGCGCGGCACGCCCCTGCCCGGAGTCTTGGCGTGGCATGGAGGGTGGTGAGG  
AAGCCTGCCTCATCTTACCATTAGCCTGGGCATGCGTGAAGTGCAGCGTCTGAGGCTGCTGCTTTC  
CCTCCGGATCCCACGTACGCCCAGGGGACAGCACCAAGCTCCGCCACGTATCCCCGTTTTTCAACA  
TCGTAGACATGGAAGTCCAGAGGGCTTCCGTGGGTGTCTGCTCCGGCCTTGGCGTCCCTTGGGCA  
AGGGAGTCTGGTAGAAGCACAGGGGGGCTGAGGCCCCGCACATCCACCACCCCTGCGGCGCTGGTG  
CCAGTTTCATGTTCCATCGCCGTAACCTGACGATGCTCAACCCAAAGCTGGTTTATACCGGCTGCTG  
CGCATAGTTGTACCATCTGCTCCACAGTGATGTAACATGATCCATGAACAGTACACGGCGTGATA

HUMAN\_HERPEVIRUS\_8\_PROBE03  
HUMAN\_HERPEVIRUS\_8\_PROBE04  
HUMAN\_HERPEVIRUS\_8\_PROBE05  
HUMAN\_HERPEVIRUS\_8\_PROBE06  
HUMAN\_HERPEVIRUS\_8\_PROBE07  
HUMAN\_HERPEVIRUS\_8\_PROBE08  
HUMAN\_HERPEVIRUS\_8\_PROBE09  
HUMAN\_HERPEVIRUS\_8\_PROBE10  
HEPATITIS\_E\_VIRUS\_PROBE01  
HEPATITIS\_E\_VIRUS\_PROBE02  
HEPATITIS\_E\_VIRUS\_PROBE03  
HEPATITIS\_E\_VIRUS\_PROBE04  
HEPATITIS\_E\_VIRUS\_PROBE05  
HEPATITIS\_E\_VIRUS\_PROBE06  
HEPATITIS\_E\_VIRUS\_PROBE07  
HEPATITIS\_E\_VIRUS\_PROBE08  
HEPATITIS\_E\_VIRUS\_PROBE09  
HEPATITIS\_E\_VIRUS\_PROBE10  
INFLUENZA\_A\_VIRUS\_PROBE01  
INFLUENZA\_A\_VIRUS\_PROBE02  
INFLUENZA\_A\_VIRUS\_PROBE03  
INFLUENZA\_A\_VIRUS\_PROBE04  
INFLUENZA\_A\_VIRUS\_PROBE05  
INFLUENZA\_A\_VIRUS\_PROBE06  
INFLUENZA\_A\_VIRUS\_PROBE07  
INFLUENZA\_A\_VIRUS\_PROBE08  
INFLUENZA\_A\_VIRUS\_PROBE09  
INFLUENZA\_A\_VIRUS\_PROBE10  
INFLUENZA\_A\_VIRUS\_PROBE11  
INFLUENZA\_A\_VIRUS\_PROBE12  
INFLUENZA\_A\_VIRUS\_PROBE13  
INFLUENZA\_A\_VIRUS\_PROBE14  
INFLUENZA\_A\_VIRUS\_PROBE15  
INFLUENZA\_A\_VIRUS\_PROBE16  
INFLUENZA\_A\_VIRUS\_PROBE17  
INFLUENZA\_A\_VIRUS\_PROBE18  
INFLUENZA\_B\_VIRUS\_PROBE01  
INFLUENZA\_B\_VIRUS\_PROBE02  
INFLUENZA\_B\_VIRUS\_PROBE03  
INFLUENZA\_B\_VIRUS\_PROBE04  
INFLUENZA\_B\_VIRUS\_PROBE05  
INFLUENZA\_B\_VIRUS\_PROBE06  
INFLUENZA\_B\_VIRUS\_PROBE07  
INFLUENZA\_B\_VIRUS\_PROBE08

ATGCAATGCTTCCAATAGCGCTGTATTCTCCGTCCTTCTTCTGGTAAGCACCTGTGTACAATACGC  
TTAAAAATCCCTTTGGGGTCTCTTGAGTCCCTGCAGATCCGCCACGCCACGTCCCCATTGACGCGTC  
CCGGGGGCTGGCAACCTACGTAGGTTGACAACAGCGAGCTTGTCCAAGAGACTTCGTTTTCCCACCGTC  
GGCCACCTGGCCACCTACCGCCGGCTCTCAAGTACTCCACCCTGCCCGATCTATGGCGGTTTCTAAGT  
TGAATTCAGTCTATGGAGAGGTTGGTTCTCCATTGATGAGCTGCGTGGCGGAGCGGGTTATTGTCTG  
CTGCATTAGTGCAGATGCGAGATGTTCTGTCACCGGGCGCCACTTTGGGAAGGCGCTGTAAGGTCAAT  
GAACCTCCCCTGGACACCACAGATTATTCTTTGAGGTGACTCTAGGGCACAGAATTGCCGACTGCGTA  
TATACGTGACGTGAGGCAAGGTACCGTAGCTATTATCTTGTGCGGTGTAATCTTTGAACAGTTAATCGC  
GGGCCGACTCATAAAAACCAACACCCGTGGGTCAAGATGAAAGCCGGCCGAGAGCCAGCGCCTACTG  
TGGCCTCCACTAGCTCGTACAATTCACAGGTTGTAACCTGTACGTGGCCAATGGCCGGGATAAAAACGGC  
TCACAAAAGAGGCAGCATCAAAGGATGCGGGTACCTTTGGTAAAATGCATGACAGAGCCCACCGCCAGG  
TCGTGAGCTTTCGGGAGAAAATCACTACAGCGAGGCGGAGCTGCTTCGCCGCTCGGGGCCAGGGCCCA  
CTGTTAATCAAATGTTACGACACTACAGGTTGAGTTCTTTGGGGCAGGTAGAGAAGGAAAGGCTGTT  
CAGTAAGCCGGCCGGAAGCGCACGCTCAGGAAGCGCCAAAGGCCGGGGCCACCACAACACCTGTC  
CCTGTTCAAGCTCAGGGCAGGGCGGTAGAAGCCGCGACAGGGGCAGGTCTGTGGCAAGCTCCTCAGC  
TGTGGCGCTCTGGGCCATTAGTCTCTAAAACCGCCCCGTCAACAAAACGACGTGCGGAAGTTTTATTACC  
CAGCCGCGAGAAGACGGTGTGCATCAAAGGCATCCCCATAAAAACACACCCTGAGGGAGCAGGGCCAGGAT  
ATATGCCGGTCCCGAGGAGTGGGTATGCAGCGGTACCGAGGCGGGAGCAAGTCTCCCGGTAGGCAGCCTC  
TTTAAATAAAAAAGTTGATGATGGATTCTGGACATTTGGACATATAATGCAGAATTGTTAGTTCTACTG  
CAGTAGAATAACAATTCGATTATATGTCCAAATGTCCAGAAATCCATCATCAACTTTTTATTAAAA  
ATGAATGCCTGGAAAGTGAAGAAAATGGGACTATGATTATCCCAAATATTCAGAAGAGTCAAAGTTGAA  
TTCAACTTTGACTCTTCTGAATATTTGGGATAATCATAAGTCCCATTCTTACACTTTCCATGCATTTCAT  
GGCAATCAGTTTCTGGATGTGTTCTAATGGATCTTTCAGTGCAGAATATGCATCTGAGATTAGAATTT  
GAAATCTAATCTCAGATGCATATTCTGCACTGCAAAGATCCATTAGAACATCCAGAACTGATTGCC  
ATGATGCAACTTATCAGAGGACAAGGGCTCTTGTTCGCACCGGAATGGATCCCAGGATGTGCTCTGAT  
ATCAGAGAGCACATCCTGGGATCCATCCGGTGCGAACAAGAGCCCTTGTCTCTGATAAGTTGCATCAT  
ATGAAAGAATGTGCAACATTCTCAAAGGGAAATTTCAAATGCTGCACAAAAAGCAATGATGGATCAAGT  
ACTTGATCCATGATTGCTTTTTGTGCAGCAGTTTGAATTTCCCTTTGAGAATGTTGCACATTTTCAT  
CACTGAGTGACATCAAATCATGGCGTCCCAAGGCACCAAACGGTCTTACGAACAGATGGAGACTGATGG  
CCATCAGTCTCCATCTGTTCTGAAGACCGTTTTGGTGCCTTGGGACGCCATGATTTTGTGTCACCTCAGTG  
AGGGATACTCTAGTCGGAATAGACCCTTTCAGACTGCTTCAAACAGCCAAGTGTACAGCCTAATCAG  
CTGATTAGGCTGTACACTTGGCTGTTTTGAAGCAGTCTGAAAGGGTCTATTCCGACTAGAGAGTATCCCT  
TCATAAGGATGATGGAAAGTGCAAGACCAGAAGATGTGTCTTTCCAGGGGCGGGGAGTCTTCGAGCTCTC  
GAGAGCTCGAAGACTCCCCGCCCTGGAAAGACACATCTTCTGGTCTTGCACTTTCCATCATCCTTATGA  
AAAAGGCAGCGAGCCCGATCGTCCCTCTTTGACATGAGTAATGAAGGATCTTATTTCTCGGAGACAA  
TTGTCTCCGAAGAAAATAAGATCCTTCACTACTCATGTCAAAGGAAGCAGATCGGGCTCGCTGCCTTTT  
AAAGGGTCTTTGGGAAAGCACTAAGAGTAATATTACCAAATGTTTGTGATGATTATGATTTGGAAATG  
CATTTCAAATACATAATGCATCAAACATTTGGTGAATATTACTCTTAGTGCTTTCCCAAAGGACCTTT  
ATCAATACAGAGACGGCACAGGAGGACCTACAAGGTGGGGACCTCAGGATCTTGCCCTAACGTTGCTA  
TAGCAACGTTAGGGCAAGATCCTGAGGTCCCCACCTTGTAGGGTCTCTGGTGCCGTCTCTGTATTGAT  
ATCCTCAAAGTTCACCTCATCTGCCAATGGAGTAACCACACATTATGTTTCTCAGATTGGTGGCTTCCC  
GGGAAGCCACCAATCTGAGAAACATAATGTGTGTTACTCCATTGGCAGATGAGGTGAACCTTTGAGGAT  
GCAAGTGGCAGGACCAAGTAATAAAGGGTCTTCTTAAATTTGGTGAAGCAGATTGCCTTCCAGGAAA  
TTTCGTGGAGCAATCTGCTTACCAATTAAGGCAAGGACCTTTTATTACCTTGTCTCTGCCACTTGC

INFLUENZA\_B\_VIRUS\_PROBE09  
INFLUENZA\_B\_VIRUS\_PROBE10  
INFLUENZA\_B\_VIRUS\_PROBE11  
INFLUENZA\_B\_VIRUS\_PROBE12  
INFLUENZA\_B\_VIRUS\_PROBE13  
INFLUENZA\_B\_VIRUS\_PROBE14  
INFLUENZA\_B\_VIRUS\_PROBE15  
INFLUENZA\_B\_VIRUS\_PROBE16  
INFLUENZA\_B\_VIRUS\_PROBE17  
INFLUENZA\_B\_VIRUS\_PROBE18  
INFLUENZA\_B\_VIRUS\_PROBE19  
INFLUENZA\_B\_VIRUS\_PROBE20  
INFLUENZA\_B\_VIRUS\_PROBE21  
INFLUENZA\_B\_VIRUS\_PROBE22  
INFLUENZA\_C\_VIRUS\_PROBE01  
INFLUENZA\_C\_VIRUS\_PROBE02  
INFLUENZA\_C\_VIRUS\_PROBE03  
INFLUENZA\_C\_VIRUS\_PROBE04  
INFLUENZA\_C\_VIRUS\_PROBE05  
INFLUENZA\_C\_VIRUS\_PROBE06  
INFLUENZA\_C\_VIRUS\_PROBE07  
INFLUENZA\_C\_VIRUS\_PROBE08  
INFLUENZA\_C\_VIRUS\_PROBE09  
INFLUENZA\_C\_VIRUS\_PROBE10  
INFLUENZA\_C\_VIRUS\_PROBE11  
INFLUENZA\_C\_VIRUS\_PROBE12  
NEW\_CASTLE\_DISEASE\_VIRUS\_PROBE01  
NEW\_CASTLE\_DISEASE\_VIRUS\_PROBE02  
NEW\_CASTLE\_DISEASE\_VIRUS\_PROBE03  
NEW\_CASTLE\_DISEASE\_VIRUS\_PROBE04  
NEW\_CASTLE\_DISEASE\_VIRUS\_PROBE05  
NEW\_CASTLE\_DISEASE\_VIRUS\_PROBE06  
NEW\_CASTLE\_DISEASE\_VIRUS\_PROBE07  
NEW\_CASTLE\_DISEASE\_VIRUS\_PROBE08  
NEW\_CASTLE\_DISEASE\_VIRUS\_PROBE09  
NEW\_CASTLE\_DISEASE\_VIRUS\_PROBE10  
NEW\_CASTLE\_DISEASE\_VIRUS\_PROBE11  
NEW\_CASTLE\_DISEASE\_VIRUS\_PROBE12  
NEW\_CASTLE\_DISEASE\_VIRUS\_PROBE13  
NEW\_CASTLE\_DISEASE\_VIRUS\_PROBE14  
CANINE\_DISTEMPER\_VIRUS\_PROBE01  
CANINE\_DISTEMPER\_VIRUS\_PROBE02  
CANINE\_DISTEMPER\_VIRUS\_PROBE03  
CANINE\_DISTEMPER\_VIRUS\_PROBE04

TTTAAAAGAAGAGGTGAAAACAATGTACAAGACCACCATGGGGAGTGATGGTTTCAGTGGACTAAATCAC  
GTGATTTAGTCCACTGAAACCATCACTCCCCATGGTGGTCTTGTACATTGTTTTACCTCTTCTTTTAAA  
GCCCTGTGTTTGCAGTAGAAAAGACCTATTGCTCTAAGCAAGCAAGCTGTAAGAAGAATGCTGTCAATGAA  
TTCATTGACAGCATTCTTCTTACAGCTTGCTTGTCTAGAGCAATAGGTCTTTCTACTGCAAACACAGGGC  
GAGGGACACAGCAGAGGATTATGATGACCTCGATTATTAAGCAATAAAAATAGACACTATGGCTGTGACT  
AGTCACAGCCATAGTGTCTATTTTATTGCTTTAATAATCGAGGTCAATATAATCTCTGTGTGTCTC  
CAAATGGGCCATTACCCGAAGACAATGAACCGAGTGCCTATGCACAATTGGATTGTGTTCTGGAGGCTTT  
AAAGCCTCCAGAACAATCAATTGTGCATAGGCACTCGGTTTATTGTCTTCCGGTAATGGCCATTG  
AGAATAACAAGAGTGAATACATCAAAAGAGCATTATCATTAAACACAATGACTAAAGATGCTGAAAGAG  
CTCTTTCAGCATCTTTAGTCATTGTGTTAATGATAATGCTCTTTTGATGTATTCCACTCTTGTATTCT  
GACTAAAGATGCTGAAAGAGGCCAACTAAAAAGAAGAGCAATTGCCACCGCTGGGATACAAATCAGAGGA  
TCCTCTGATTTGTATCCAGCGGTGGCAATTGCTCTTCTTTTAGTTTGCCTCTTTCAGCATCTTTAGTC  
AAAGAGGATTTGAAAAAGCAATGGCTCACCTTGGTGAGATTGGGTACATGTAAGCTCCGGAAATGTCTA  
TAGACATTTCCGGAGCTTACATGTACCCAATCTCACCAAGGTGAGCCATTGCTTTTTCGAAATCCTCTTT  
TCCAAATCCTTCACGTATGAGATTGAGCTATGCATTTGTTTTGTATTGCAGAAATACTAAGAAGATCTGT  
ACAGATCTTCTAGTATTTCTGCAATACAAAACAATGCATAGCTCAATCTCATACGTGAAGGATTTGGA  
ATTGAAACAGGAATTAGAAAATGTTTCAGATGCATAAAAGCGGATTGCTTATGGCTACCGATGAAATCT  
AGATTTTCATCGGTAGCCATAACGAATCCGCTTTAATGCATCTGAAACATTTTCTAATTCCTGTTTCAAT  
GAGCCCAGCTCGATCCCTATTGGGAAATGAAACACCAGATATTGACAAGACTGAAGCTTATATGCTCTCG  
CGAGCATATAAGCTTCAGTCTTGTCAATATCTGGTGTTTCATTTCCCAATAGGGATCGAGCTGGGCTC  
GCAAGCGACATGTAATAAAGCAACTTAGTTTGAATAAATCAGAAGGAAGAGACATCAGAAAAGCAA  
TTTGCTTCTGATGTCTCTTCTCTGATTTTTTCAAAGTAGAAGTTGCTTTATTTCAGCATGTCGCTTGC  
ACGAAATTGCTGGTATTACTGGCCTTGGAGAAGAAGCACTATCTCTCAAAGACAAACAGAAAGTTTGGC  
GCCAACTTTCTGTTTGTCTTGGAGAGATAGTGCTTCTTCTCAAGGCCAGTAATACCAGCAATTTCTG  
TATAATGAGACCCCACTTGGAAAAAGCAATAAAAGGAGTTGAAGGCAGAGTTGGAGAGATGGGACGAATG  
CATTCTGCTCCATCTCTCAAACCTCTGCCTTCAACTCCTTTTATTGCTTTTTTCAAAGTGGGGTCTCATTATA  
ACAAACGCATGAGCTGCTTCTTCTGGATGTCGCCTGAGAGGCTACTAAGTGCAAGGGCTGATGTCTT  
TGCCGTTGGCAAAGCCATCAATCTAAGCACGGCCAATGTGGCTTCACTTGTCTTCCCTGCAAGGGCAAC  
TGGCTTCCATGACTGCAACAAATGTTTTAGCTGTTGGATTTTCGACCCCATCATAGGGATGGAGGATGT  
GGAGACCATGAGGGGTTGCACCAGCTGATAGTTGTGACTCCTCCATTGTCCATGATATGCTGTGTTTAC  
GCCTTGTTCGACTCATCTGCAGTCTCATACGCAGTCAATGGCTTTTGTACTGTGACCCATACTTGTGAC  
CCTGTGAGTGGGAGCATAAAAGAGATATGAGAGCACCTTGCCTGAGTGGTTTGTGGCATCTTCCGCTAAC  
ACTTGCTTAGGAGCTTGGCTGAAGAAGCTCGGGTGCATTGGGCGTGACATGATCAATGCACGGACAGTGT  
TGGATGTTGTTTGTGAGATCTGCTCTGTCGATCGGGGTTGTCTTACTGAGCCGGTGGCTGGATGCTCCC  
TATCACCAAGTAATGTATGTACGGCGCATATCTCTTTCATCCGATACAAACGCATGAGCTGCTTCA  
CTATGCTGTGGTACCTCGAGACTGTTGGGACAGCTGCCAGGCCCTCTTGTGCTGCCGGGTTAG  
CAAGGCGCTTGATTTTCTGATTTCTCGATCGACCCGGCTGCATCTAACTTGTCTTAGGAGCTTGGCTGA  
CCCCCTCATGAGCTCCATTGGGGCGAGTCTGAGCCGCGAGGAGCTGTTCTGACTCGTCAATACGGAAGA  
AGAGGATGATTTCTTTTGGACCTGCCTTGTGTCATATACTTATTGATTGCCTTGTTCGACTCATC  
ATCGGGCAACTGCCCGTAGTCACTCAAAGATGAAATGTTGGCACAACCGGGATCCAAATCTTTCATCAT  
GTCTGGCTGTAGTACGCCCAACTCCTAAAGGCAGCGATCCAAATGTTCTTCAATTGGAGGTCCGAGGCC  
TCTCAGAGAAAAGCTCATCTGACTACTGTCAGACTCAGCCTCATTGAGGTCTGGGAGGGAGTTG  
TCAAATCTTCAATGATCTCCATGAGCGGGTAAACAGGATTTTCTTGAACCTAGCTGGGCACTCAAGG  
TACCGACAGTGCCTGCAGGTACCACGAGACTGTCAGCATCTTTCGATTCCCTTAACTCTTACCGCTGTG

CANINE\_DISTEMPER\_VIRUS\_PROBE05  
CANINE\_DISTEMPER\_VIRUS\_PROBE06  
CANINE\_DISTEMPER\_VIRUS\_PROBE07  
CANINE\_DISTEMPER\_VIRUS\_PROBE08  
MEASLES\_VIRUS\_PROBE01  
MEASLES\_VIRUS\_PROBE02  
MEASLES\_VIRUS\_PROBE03  
MEASLES\_VIRUS\_PROBE04  
MEASLES\_VIRUS\_PROBE05  
MEASLES\_VIRUS\_PROBE06  
MEASLES\_VIRUS\_PROBE07  
MEASLES\_VIRUS\_PROBE08  
MEASLES\_VIRUS\_PROBE09  
MEASLES\_VIRUS\_PROBE10  
MEASLES\_VIRUS\_PROBE11  
MEASLES\_VIRUS\_PROBE12  
PESTE-DES-PETITS-RUMINANTS-VIRUS\_PROBE01  
PESTE-DES-PETITS-RUMINANTS-VIRUS\_PROBE02  
PESTE-DES-PETITS-RUMINANTS-VIRUS\_PROBE03  
PESTE-DES-PETITS-RUMINANTS-VIRUS\_PROBE04  
PESTE-DES-PETITS-RUMINANTS-VIRUS\_PROBE05  
PESTE-DES-PETITS-RUMINANTS-VIRUS\_PROBE06  
PESTE-DES-PETITS-RUMINANTS-VIRUS\_PROBE07  
PESTE-DES-PETITS-RUMINANTS-VIRUS\_PROBE08  
PHOCINE\_DISTEMPER\_VIRUS\_PROBE01  
PHOCINE\_DISTEMPER\_VIRUS\_PROBE02  
PHOCINE\_DISTEMPER\_VIRUS\_PROBE03  
PHOCINE\_DISTEMPER\_VIRUS\_PROBE04  
PHOCINE\_DISTEMPER\_VIRUS\_PROBE05  
PHOCINE\_DISTEMPER\_VIRUS\_PROBE06  
PHOCINE\_DISTEMPER\_VIRUS\_PROBE07  
PHOCINE\_DISTEMPER\_VIRUS\_PROBE08  
PHOCINE\_DISTEMPER\_VIRUS\_PROBE09  
PHOCINE\_DISTEMPER\_VIRUS\_PROBE10  
PHOCINE\_DISTEMPER\_VIRUS\_PROBE11  
PHOCINE\_DISTEMPER\_VIRUS\_PROBE12  
RINDERPEST\_VIRUS\_PROBE01  
RINDERPEST\_VIRUS\_PROBE02  
RINDERPEST\_VIRUS\_PROBE03  
RINDERPEST\_VIRUS\_PROBE04  
RINDERPEST\_VIRUS\_PROBE05  
RINDERPEST\_VIRUS\_PROBE06  
RINDERPEST\_VIRUS\_PROBE07  
RINDERPEST\_VIRUS\_PROBE08

AGACTGTCAGCATCTTCGATCCCTTAACCTCTTCACCGCTGTGATCATAAACATGATCACATCGTATTC  
CATGTGAGACTGACCTCTCTTCTGTGCCCTTTTAAATGGATCCACACTCCGGATCCCTTGTCTTACCTTC  
CAGGTTTGGTCTCTGAGGCTGCTGACCTCTTGAATCTCCTCAATGTGAGGAGGATTCTCTGAGGGCTT  
GAGTTAAGATGTGCAATGGGGTGTATTATAAAATACCAGTTGTTTCTTGACACCTGCAGTTCGCCCTTAC  
CCCGGATGCGAGGTGCACCGCCTTCAAGTTCATCAATGCTGAGAGGCATGGTTTGTGAGACCCGAAAC  
TCATGTTGAATCCCTCAGGGTCTTGCACTTCAATATCTGAGATTTCCTTGTTCGAACCATCCGGACCT  
GTGAAAAGTATTGGTCCGCCTCATCTCCATGTTGGTACCTCTTGTGCGAAGGTAAGGCCAGATTGTGA  
AGGTGGTAGGTTGTATCGGAGCGATCGACCCTTGTATGTCATGCCCATGCCGACTTGTGAAATCGTAGATCTC  
GGGCGTCAGTGCACCTTCGACTGTCCTGCGGATCTTGGCCTGACTCCGATGCAGTGTCAATGTCTAGGGG  
ACTCCGATGCAGTGTCAATGTCTAGGGGATGCTGGTTGGAGGATGGGCAGCTCTCGCATCACTTGCTCT  
ACCCGTTATCCGAAAGACGGGTGATGCTCATATAAACACCGAAACCTCTGCGGGGTGCCAGCGGTAT  
ATGTGGAATGACCTTTCCAGCTGACCTCCTCACCATCTCTTGCCTAATCTAAAATATGCTGGATCAAA  
CAGCTGACCTCCTCACCATCTCTTGCCTAATCTAAAATATGCTGGATCAAAGTAAGATCGACCAAAGT  
CAGGGCCAATCGCCTTGTCAATCCTAAGGGTCACTAGCAGGTTGAAGGCCACTGCATTGACCATCTGAA  
CCTGCCCTCTCTTCTTGCAGGTGGCTCGGTCTGCTGGGTTGTCTGATATTTCTGACCATGCTGCCA  
CACTTTGATCACCGTGTAGAAATGACACTTGGGCTTGTCTGGGTCGACCGCTCTACTGATCCTGTCTCT  
AAGATGATGAGCGACCTGTGTCATAGATATAGTACACGATAGCATGCTCGCTCCTAGAAACATCATAAGT  
GGACACTCCCCACAGACGCATTTTGTCTGATGACTCCCATCTTACTCTGGCACAGCTTGGGTTGCACC  
TAGCTAAGTCAAGACTGACCTGATCACCCGTAAGCAGGGATTCTCCCCTCTGACCACGGGCCTGATCC  
AGTCCACATCGCTGTCGTCAGATCCATCTCTCCTCATTGAAGACGTTAGCAACTGGAGGATCTGCTTG  
CTATTGCCTGATTCGACTTCTAAGACTGGTTTTAAACTCTCAATTGCTGGGAGTTCATCAATGATTG  
TAATATGGAGACTTGTCCACCTATTCTCCCAGGGCAAAAATAAACCCATCTTTCAATCTTCATTTT  
CTCCTGCAGTTATCTGAGCGGCTGTCGCAACTCCAAGTCTACTCCGGCCAGAACAGCTCCAGCAAAGCG  
TGGTGGGTTCTATGCGAGCAATTGACCTTTGACATCCCATGCTGATTATCGAAGTCGTAGATCTCGGT  
AATATTGATGACTAGACCTGGTCATAATCTTATAATGGGAATATCAGTCCCGATGATTCCAATTGTTGA  
GCTCCTCAGGTTGCGGGTGTACGACCGACTCCTAGCGGTAATGAGCCGAATGATCTACCAATTGGAGG  
GAACTGTAGAGTTCTCCCGTCCCTCTTTGGCCCCCGGCATTGTGGCCTGTGCCAAGCAGAGCAGTCAA  
AGGATTCTATCAATAACCTTAGCATCATTAATTTCTTCAGAGCACTGCCTAAGTTTGTCCCAACATCTAA  
TTACCAAGATGTTGAATGCCAATGCATTTTTACATCGGAAATCAAACATTCCGCGAGGGATCCTGTAACA  
AATCTTCGCTAGAATCTTCAATGCTATCATCAAGGCTTCCCTCTCTTCTTCCGAATCCCCTATTACTTGG  
TTGTAGGTTTGTATCCCTGATGTTGCTGACCTCTTGAATCTCTCCATGTTAGGAGGATTTCTCTGAGGG  
TGACTTGATGATGCACTGCCTCTGTTTTTCCATATCCTCTATCAACAACCTATTGAACTCCAATTGCT  
TATAAGCAGGGGAGACCTCCCCATTTGTATCTGACTGATTTAGAATCTTGGTGAGCTGTCTCATTTTGGC  
ACATCGCTGACACTGTTTGTATCTTTGTTGGCGTGTGTGATTATCGATATTCTGAGTGATTTCTTCTCT  
CAAAATTTCTTCAAGTATCGTCACTACTAATAGGTAAGTCTTACCGTAGATCCCTTCTGAGATTGCAGT  
ACCCAGACAGCCGATCATCAATGAGCTGATTGGAATACTTATCACCTCCTTGGAAATTCAGACTCATGGT  
GGATCATTTCTTGGCCTGCTTGTGATTTCTCAATTGCTTATTGATTGTTTCCAGACTTGCCCTAAG  
CGGATCTGAACCTAGTATCTTCTTGGTACAGTGAATAACCGCTGTGAGATAGACGGTTATACTCAT  
GCTTTTGGATCTCGTCCCTTCTACTGTTTCAACATCGGAGGCTTGTGCTGGAGAGATGGGAGAAGA  
GATGAAGAGCAATCCCTGCTGTAATCTGGGCTGCGGTTGCAACTCCGAGAGCTGCACCAGCCAAAGCGAC  
CAACATGGACCATAAATGTCGCCTCGGAAAGGCCAATCCCCCGCTGCTGGTCTTCCAGGTTCAAGTGT  
ATGAAGACTCGGCCATCGTCCAGATGAGGTCGATTTACAGTCTGTGCCCTTTTAAATGGGTTTCTGTA  
GCTCTTGGTGGAGATGGGAGAAGACTCCAGTCAAGCGGGAGCACTCCCTCGGGATCAGGTTCTCGC  
CATCTGTTCTCGTACAGGGACGCCATATGGCAGTCCCTGCAGCTATGATCCCCCTATGAGTTGTGAT

RINDERPEST\_VIRUS\_PROBE09  
RINDERPEST\_VIRUS\_PROBE10  
RINDERPEST\_VIRUS\_PROBE11  
RINDERPEST\_VIRUS\_PROBE12  
BOVINE\_PARAINFLUENZA\_VIRUS\_3\_PROBE01  
BOVINE\_PARAINFLUENZA\_VIRUS\_3\_PROBE02  
BOVINE\_PARAINFLUENZA\_VIRUS\_3\_PROBE03  
BOVINE\_PARAINFLUENZA\_VIRUS\_3\_PROBE04  
BOVINE\_PARAINFLUENZA\_VIRUS\_3\_PROBE05  
BOVINE\_PARAINFLUENZA\_VIRUS\_3\_PROBE06  
BOVINE\_PARAINFLUENZA\_VIRUS\_3\_PROBE07  
BOVINE\_PARAINFLUENZA\_VIRUS\_3\_PROBE08  
BOVINE\_PARAINFLUENZA\_VIRUS\_3\_PROBE09  
BOVINE\_PARVOVIRUS\_PROBE01  
BOVINE\_PARVOVIRUS\_PROBE02  
BOVINE\_PARVOVIRUS\_PROBE03  
BOVINE\_PARVOVIRUS\_PROBE04  
BOVINE\_PARVOVIRUS\_PROBE05  
BOVINE\_PARVOVIRUS\_PROBE06  
BOVINE\_PARVOVIRUS\_PROBE07  
BOVINE\_PARVOVIRUS\_PROBE08  
CANINE\_MINUTE\_VIRUS\_PROBE01  
CANINE\_MINUTE\_VIRUS\_PROBE02  
CANINE\_MINUTE\_VIRUS\_PROBE03  
CANINE\_MINUTE\_VIRUS\_PROBE04  
CANINE\_MINUTE\_VIRUS\_PROBE05  
CANINE\_MINUTE\_VIRUS\_PROBE06  
HUMAN\_BOCAVIRUS\_PROBE01  
HUMAN\_BOCAVIRUS\_PROBE02  
HUMAN\_BOCAVIRUS\_PROBE03  
HUMAN\_BOCAVIRUS\_PROBE04  
HUMAN\_BOCAVIRUS\_PROBE05  
HUMAN\_BOCAVIRUS\_PROBE06  
HUMAN\_BOCAVIRUS\_PROBE07  
HUMAN\_BOCAVIRUS\_PROBE08  
HUMAN\_BOCAVIRUS\_PROBE09  
HUMAN\_BOCAVIRUS\_PROBE10  
HUMAN\_BOCAVIRUS\_PROBE11  
HUMAN\_BOCAVIRUS\_PROBE12  
CANINE\_PARVOVIRUS\_PROBE01  
CANINE\_PARVOVIRUS\_PROBE02  
CHICKEN\_PARVOVIRUS\_PROBE01  
CHICKEN\_PARVOVIRUS\_PROBE02  
CHICKEN\_PARVOVIRUS\_PROBE03

ATTCAACCCCAATCCCATAGCATAGCTCCACAACAGGGGGTATGCTCCTGCACTGAACTGTTCTGGAT  
ACACCATCATCAGCGCCTGATTGAACCAGGATAGAGTCAGCATCTTCGACTCCCTCAACCTTTTCACCGC  
GAAACTGGTGTGCCACTCCTAGTTCCTAATTATGCCTACTTCGAAGACTCGGTAATCCTGTTGCCA  
CTGATTGAGTTTTGTCACTTGGACTACCTCCACCAATTAATGCTGATATCAGGGTCATCAGTGATTCT  
ATCAACAGGTATTGAGGACATTGTACTTGACATTGTCAGTAGTAATGGATTAATTATAACAACAAGATTC  
GGTCCACACAAGAAGCCAAGCAAAGCTTGAAGAAACACATGAAGAACATCAGCAGTTCAGATACAACCTT  
AACTGACTGGATGTTGGGAGTGATCTTGAGTATGATCAAGACAATATGTTGCAAAATGGTAGAAGCACT  
GACAAGATGGAACAGTTAAATCCAGTCTAGTGTGAGCGGTGATGCAGTAGAACAAATTGGATCAATTAT  
TTTATTCGGTGATACTTGTAAATCAGATATTTGGGTTAAAGGAATTATTTAATTGGCTGCACCCTCGCCTT  
TAATCCGCCTGAAACGATTGAAGATTGGGATCCCATAGAAGATGAGAATATCTTAGACAATATTGTTAAA  
AATTGGATCCTAAGTTACAATCAATGTATTATAAGGGTAACAATTTATGGGAAATAATAGATGGACTATT  
GTGGACTATCCAATGAGACAAAATATTGGGGTCCAGAAGGAAGACTGCTTTTATTAGGTGACAGAATA  
ACTAAAAGACAACATCAAGAGGTACCAATACAGAGAATGACTCATGATAGTGGTATAGAACCTCTAAAT  
CTGTCTCCTTCCTCGCTTCTGGTAAGGTCTCGAAGCAGTAGAGGACGATTGGTCTTCCCGGCT  
ATGGATGCTGTACGTACGGGTATCTGTGATCCCCGTGCGAGAAGATGTGCATGCCTGCAGTCAGATCATT  
GTCCATTGAATATTTATTAGTCCCTTTGCTGGCCAGTCGAGTCGAGTGCCAGTAGAAGCCGAGAAGCTG  
TTCTGGCGGATGTGACATTGGAATGGATCCGCTTGTGTGTCCAGGAGTGTCTTTCTGTTGACTCTCGG  
ATAGCCCCACTGCGTGGCAGATGGCCTTAGCGAGATTGGTTTTCCCTGTGCTCGCCGGCCATAGAAAA  
AACCAGATCCTACCACGGACCGAGTCGCCAGTCAATTGGCTGATTGCCAGCCTCGTCGTTAGGTATATC  
TGAACCCAGTAGCTTGGTGAGCGAGTGAGTTGATGTCGTGAGCGCTCAGTCTATCAACCTCCTCCCGCAT  
CTGACATCCAGTTGCTGGTTCTAGTGTCTGATTCTGGAATCGTTGCTTGGTTGGTTGGTCCCGCTG  
GTCCGAGGGCTTGTCCCGAGTAGCCGCGCTTTGTGTGTTCCAATGTATCCAAGCGATGGTCCCTGGCAT  
ACGGACTGTATCGCGTGTACACGAATTTCTGAGTTGTTGTAGTTGTTTCGTGTAGCGAAGTAGCGTCT  
TGTGCCAGTAGAAGCCACAGAACGCAGGAAGAGGTTCTTTGCTTCTGCTTTTATGTTTATTGAATACATG  
TGAAGGCAGTGTAAGCTGATGTCAGGTTGGAGCAGTCACTACAGTACTGGTCCGAGGGCTGTTCCCG  
TCGATTGTCTCGAAACAGTGGAGGACGATTGGTTCCTGGTCCATCCCCTGTGGAATGATCCCAAGTCTCT  
CTGGCATCCACTGTGATGGCTTGTATACGGACTGTATCGCGTGTACACGAATTTCTGAGTTGTTGTA  
TTTGTAGTTGTTGAAACTGTTGTTTCATTTCAAAGATTGAATTAGTACCATCTTAGCAATGCGAGT  
ATTTGTCTGAAAAGTGAGAACCTCCGACCCACCCTCCAGTGGAATCCCCACACCAGATCCTTTTCTCC  
GTTTGTGAGCCCTTGGTTTTTGCACCAGATTGGATTTCTCTGGTGATAGGAAATCTGTCCAGACTG  
AGTGCCAGAACATATTTCTGTATTTTGTATCTAGTGTCTTTTCTTTGATTAACAATAGTTCTCTAGTGT  
TTGGGTGTTCTGATGATATGAGCCGAGCCTCTCTCCCACTGTGTGCGATCGGGCTGCGGCTCCTGCT  
TCTTTGTTGCGTATCTTTCTACCTCCCATACAATTTACAGCTGACTTGTCCAGTACAGTATATGTTTAG  
TCTCCCCTCTTTCTGGACTCCCTTTTCTTTGTAGGAGCGATGCTTGTCTTTTATATTCCCTGAGCTCAT  
TACTTCTGTTCTCTCCCTGAGGTGTTTTGTGGTCCGTCACAGTATCAGGTTGTTGGTCTTGAATGTC  
ATCCTTTTCTCCTCCAATACTTCTGTTCTCCCTCCCTGAGGTGTTTTGTGGTCCGTCACAGTATCAGG  
CATCTGCTTCCATGCTTTGAGCAGCAGAAAGCATTTCTCGTCAAGTTATCTCGTCTGCTTCTGTCTGTA  
GCTGTGATTTTCACTTTGGTTTGTGTTTCAATGGCCTCTGTTTTGTAGAGGTGACCATTCTGAATTGT  
GAAACATCCATATGTCCTCCACTAGATTGTATGTTGGTTTGGTTTCTTTGTATAGGAGTTGGTCTCTAAG  
GTCTACCAATGCATATCTGGATCACCATCTGCTGCTGATTTTCAATATGTTTGCCTCCCCCGTCC  
TTTGGCTCCCCCGCTCCTGCTGCAATAGGTGTTTTAAATGGCCCTTGTGTAGACGCCTCAAAGAATA  
CTGCTTTGTTGTGACAGCTGTTGAGTGGGAAGTTTTGTTGTTATGATTACGTTACCGTATATTTGTAC  
CGGTCCCCCCCCACCTGTTCCCCAACCGATTTTCACTTACATAGCATAACAGGTAGAGTATGCTCCCTGG  
CGTGGAATATAATGCGTTTTTTTTTCCCTGCTTGTCCGGATAGCCAGCACAATATCAGTCTAGCAACGTA

CHICKEN\_PARVOVIRUS\_PROBE04  
FELINE\_PANLEUKOPENIA\_VIRUS\_PROBE01  
FELINE\_PANLEUKOPENIA\_VIRUS\_PROBE02  
FELINE\_PANLEUKOPENIA\_VIRUS\_PROBE03  
FELINE\_PANLEUKOPENIA\_VIRUS\_PROBE04  
MINUTE\_VIRUS\_OF\_MICE\_PROBE01  
MINUTE\_VIRUS\_OF\_MICE\_PROBE02  
MINUTE\_VIRUS\_OF\_MICE\_PROBE03  
MINUTE\_VIRUS\_OF\_MICE\_PROBE04  
PORCINE\_PARVOVIRUS\_PROBE01\*  
PORCINE\_PARVOVIRUS\_PROBE02\*  
PORCINE\_PARVOVIRUS\_PROBE03  
PORCINE\_PARVOVIRUS\_PROBE04  
PORCINE\_PARVOVIRUS\_PROBE05  
PORCINE\_PARVOVIRUS\_PROBE06  
PORCINE\_PARVOVIRUS\_PROBE07  
HUMAN\_PICOBIRNAVIRUS\_PROBE01  
HUMAN\_PICOBIRNAVIRUS\_PROBE02  
HUMAN\_PICOBIRNAVIRUS\_PROBE03  
HUMAN\_PICOBIRNAVIRUS\_PROBE04  
HUMAN\_PICOBIRNAVIRUS\_PROBE05  
HUMAN\_PICOBIRNAVIRUS\_PROBE06  
HUMAN\_PICOBIRNAVIRUS\_PROBE07  
HUMAN\_PICOBIRNAVIRUS\_PROBE08  
HUMAN\_PICOBIRNAVIRUS\_PROBE09  
HUMAN\_PICOBIRNAVIRUS\_PROBE10  
HUMAN\_PICOBIRNAVIRUS\_PROBE11  
RABBIT\_PICOBIRNAVIRUS\_PROBE01  
RABBIT\_PICOBIRNAVIRUS\_PROBE02  
RABBIT\_PICOBIRNAVIRUS\_PROBE03  
RABBIT\_PICOBIRNAVIRUS\_PROBE04  
RABBIT\_PICOBIRNAVIRUS\_PROBE05  
RABBIT\_PICOBIRNAVIRUS\_PROBE06  
ENCEPHALOMYOCARDITIS\_VIRUS\_PROBE01  
ENCEPHALOMYOCARDITIS\_VIRUS\_PROBE02  
ENCEPHALOMYOCARDITIS\_VIRUS\_PROBE03  
ENCEPHALOMYOCARDITIS\_VIRUS\_PROBE04  
ENCEPHALOMYOCARDITIS\_VIRUS\_PROBE05  
ENCEPHALOMYOCARDITIS\_VIRUS\_PROBE06  
ENCEPHALOMYOCARDITIS\_VIRUS\_PROBE07  
ENCEPHALOMYOCARDITIS\_VIRUS\_PROBE08  
ENCEPHALOMYOCARDITIS\_VIRUS\_PROBE09  
ENCEPHALOMYOCARDITIS\_VIRUS\_PROBE10  
ENCEPHALOMYOCARDITIS\_VIRUS\_PROBE11

ATAGTAGAACTGAATCTTGATTTTTTTATCTATTCTACTGAGGATCCCCCATGATACATTTTGCAGA  
TTCCATCTGTTTGCCTCCCCCGTCTGCTGCAATAGGTGTTTTAAATGGTCTTGTGTAGATGCTTC  
GTAAAGCCCAATGCTCTATTTGTTTGCATGTATGTGTTAGTCTACATGGTTTACAAATCAAAAAAATGT  
GTCTACCAATGCATATCTTGGATCACCATCTGCTGCTTATTTCATCTGTTTGCCTCCCCCGTCC  
GCGTCCCCCGTCTGCTGCAATAGGTGTTTTAAATGGCCCTTGTGTAGACGCTTCAAAGAATAATA  
CCAAGTTAAGCTGGCTCATGGTGTGCAAATGTATTGCCAGTCACTTGGCTGGAGCCAACTCCCCAAGC  
TTGCTGCAGGTGTGTATGGCAAATGTTGTTGAGTCTACTGCAACCATCATGCAAGCTGTAAGGTCATT  
CAGGCTTGTATAAGCGGCACAGACTGCATGTTCCAGTAGCAGTTGGTAACCATTTAGTTACACTCAT  
ATATTTGCTCTTGGGGTATACAGGACTTGGGTGTAAAATGCAGTTAGTGGACCATAGCTGTTAAAAAC  
TTTGAGCATTATCTTGAAGCCAGTTGGTAGCTTTTAGTACCTCTCCGAGTAAGTGTTCCTCCGCTGCCAT  
TGTCCTGATTGCTGAATCTGGCGGTGTTGGAGTAAAGTGCAGGTTGGTGAAGTGGTGTGTTGGCTCG  
TCCGTTTTGTGAGGCTGTCGATTTCTGATCCCATTCCATGTCTGTTGCCTGGTCCCATGATGTTTCTGC  
CATTACCAACTAAGTTTTGCAATGTGTTGAGCAATTACTTTTTCTGTTGATGCTGGCCCATGAAATGAG  
TGACTTTTTGTGTTTTAAATACATAAGAGAATGCTTTTTGAGCATTATCTTGAAGCCAGTTGGTAGC  
TTCCCCAATGATGCATATAGCTAGCCATTGTTGCTTGGTAACTTTCTTTACCAACCAAGCACATATTAG  
TCATTTCCGCATCTGTTGTATCTTTGTTGAGTTATTCCAAGCAATTTCTTTCCATTTAGATTGACTTT  
GATCAGCCAACAGCTCTTTGGCTACACTCTGGCACGTTGGATAAAATGCTGGTCAACTGGAGAAAGTC  
GGCCACCCTCCTGGCCTCGCCACCCGAGCACAGCTGCACCAGACCATTACGACCATTCTGGCGCATGAC  
AAGAAGGTATGGATGGTGGAGTCTGTTGAGTGGTCTTATCTACTGATCATAGTGTAGTCATTAACGA  
GTTGATAGACTCGAGCTACGAATATTAACAGCGAAAGGAAACATCCACTACCCGCTGTTTCAAGTC  
TGCTGGCAATGTTCTTGTGATTTACGATTAGCGGATGCGATTTCTCAGACTGGCTCGATCCGCACT  
TATTAATAATTTACTCCATACATTAGGGGCTACTTGCATAAGTAGTCTCTCTTTCTTAAATAAATTTCA  
CATACTTATGCATCCGAGCCAGAGTTTACCCGTAAGGATGGTCCAATCATTGAGTGCAGCAAGGGAC  
CAAGATTTCTGTTGGTGGCACGTATCGATTCTCAGCTCAGCTCGGTCCAGAGCTAGCTGCTCTCTCT  
ACGACTTGGTGTAGCCAAGGAAATCTGGCATCATGTGATGACCTTCTGGGCCTACCAGCGATGTTGTC  
CATCACATGGTATAGTCTTAGATACAACCTGCTTTCCGCTTGGAGAAGTATGGCGATCCACTGTTGGTTGA  
ACGTCAGGGTTTTGTGTAATTTGCCACTGACGGCCTGGGAAACCAGTAAGAGTGGAAAGTTTCCAGGATAG  
ATTGTTTTGCCTCTACAAACGTAACACAAAGTACGCAACAGAGTGGTCAAGACTGAAATGATGACCG  
TAAGTGATAACTCTGAGAAGCATCCTCCGCTGCGTCTTCAAACATTTCTTGAAGTACAACACATTCC  
ATACTAGCATTGTTACCCACGAACAGCTGGTCTTTAGACCAGACACAAGTGAAGGATCATATCTAAGAT  
AAGGATTTGCTGACTCTTTCTTATATTTACCTCCTAGCTGAAGAGTCCGAATAATCCACCTTTACCA  
GCCTTATCGAACTCGATGGTAGCCATAAACGTGTCCACTCCAGCACGCTACTATACTGCGGCTCCATGA  
TAGTTAGCGAAAGTTATGGCTCTGCGAATTTCAAAGAGCACACGATYCGCTTCTTGAATAGCAAGAACC  
GAGTTCTGGTCCATTAGGCAGGTTATCCTTGGACCAACGGTTGTCCATGGCAAAGCATTAAGGTTGG  
GCAGTGTTTTTGTTAACTCTGCTCATTGTAAGTCCCTGCTCCTGCTCATCCAATTGCACACG  
ATGGGGCAAAGAGCCGATCATATCCTGCTTCCAGAAATGAACGGCAAGCATAGTATCGAAGTGAAGTT  
CAATCACCAAAGTCCAGGAAGCATGTTGTGTTCCAGGAGGAAGTGGGGGCTATGTTACATATGGCACCTC  
TCAACCAATCAGAAAACACAGAGTTACGCTCCTGTACTTTGCGAAAGCCTCTTGAATTCCTCAAGCTG  
GAGTCCCTGGACGATAGTATGACAACATTGCTTCAAACGCTCTCTGTTTATGACAGGCCGATACAGAGG  
ACTGAACTTGACCCGCCATCCAGTTTTACCAGGTAGTCCGGCGGAGGGCCGACCAAAAGACACCACC  
TTACATTTCCCATGCATCCGATAGAGAACTTAATGTCTTTATAATCTTATTGCTTTTTGGGCGTCTC  
GCTCATCCAATTGCACGAACAGACTGAGGTTGACCATCTGCTTACCAGCCTTGGCCATTTGACAAC  
AACCGCAAGACGCGCCACTGTTGACTGGGTGTTGTGACCGTATTGCCGGCAGTGTCTTGAGACACTCG  
AAGCTGATCCCATAGCTTTGCTGGCAAGGTCGTTCCGCGAGTAGGGTTTGGCCATTGATGACTGCCCCG

ENCEPHALOMYOCARDITIS\_VIRUS\_PROBE12

THEILOVIRUS\_PROBE01  
THEILOVIRUS\_PROBE02  
THEILOVIRUS\_PROBE03  
THEILOVIRUS\_PROBE04  
THEILOVIRUS\_PROBE05  
THEILOVIRUS\_PROBE06  
THEILOVIRUS\_PROBE07  
THEILOVIRUS\_PROBE08  
THEILOVIRUS\_PROBE09  
THEILOVIRUS\_PROBE10  
THEILOVIRUS\_PROBE11  
THEILOVIRUS\_PROBE12  
THEILOVIRUS\_PROBE13  
THEILOVIRUS\_PROBE14  
THEILOVIRUS\_PROBE15\*  
THEILOVIRUS\_PROBE16  
THEILOVIRUS\_PROBE17

COSAVIRUS\_PROBE01  
COSAVIRUS\_PROBE02  
COSAVIRUS\_PROBE03  
COSAVIRUS\_PROBE04  
COSAVIRUS\_PROBE05  
COSAVIRUS\_PROBE06  
COSAVIRUS\_PROBE07  
COSAVIRUS\_PROBE08  
COSAVIRUS\_PROBE09  
COSAVIRUS\_PROBE10  
COSAVIRUS\_PROBE11  
COSAVIRUS\_PROBE12  
COSAVIRUS\_PROBE13  
COSAVIRUS\_PROBE14  
COSAVIRUS\_PROBE15  
COSAVIRUS\_PROBE16  
COSAVIRUS\_PROBE17  
COSAVIRUS\_PROBE18  
COSAVIRUS\_PROBE19  
COSAVIRUS\_PROBE20  
COSAVIRUS\_PROBE21  
COSAVIRUS\_PROBE22  
COSAVIRUS\_PROBE23  
COSAVIRUS\_PROBE24  
ENTEROVIRUS\_A\_PROBE01  
ENTEROVIRUS\_A\_PROBE02

GCTTACC GCCTTGGCCATCTTGACA ACTTGGGAAAGTGCCAGAGTCGCAGCACACAACATTGCAGAAAT  
ACAGACAGACAGTAGTGGTCAAATCTGGATTGTGAAGATAAAGAACTGAAGCAGCAACCATTTTTACAAT  
AGAGGTGTCTTTGACCAACAAACAGGATTGTGTAACCTGTGCCTTGTCTGCATAAAAGAAAGTGATAGG  
TTCCAATTGCTCTCAGTAACATACTTTGTA AACCCAGACATGGGTGCTTGGGATTTAGTTAGCACCCACC  
CTTCAACCATTTCTGAGTGATTATCGTAGCAGCAGCCATACCGCCACCACCAGCCGAGTGCAATTGCCTA  
TTCCGAAGTCAGATGTTGGAGCAACACCAAAAGCGTGTGAGGTGTTAGAAAAGTCAGAGAATCCGTTAAACCA  
CGTCAATTTGATCCTGTAGGGCAGCATTGTCTGTCTCAGGCAAGTCAACACATAGTCCATGTCTATTACC  
GAACAAACGAAATTTGATTTCGTAGAACAGCTCCAACCCAGCCATGTGTGGGTCTCGAGTGTCTGCGAG  
ATAAAGAGGCAATGGATGCAAAAACAATCGCTGAAACTTTGAGCCAATCTGATAAGAAATTTGTCTTTT  
TGACACAGCAGCATTCTGCCTGCCGTTGTCAGACCCGAAAGCCTGGAATCCGGAAGGTGAGCACAGGACGTC  
CAGAACCACACCAACCACGTGCGAGTTTGTGCTCGATAGTGGAGGCAGTGGTTGAAGCAGGCTCCAGTTGT  
TGGTTCATGAGTGGGAAGTTGGCACCATTGGCGCCACCAGACCCGACCCATCGCCACTGGACGGGAGCCTT  
CAATACCAGCAAAAATGATAGCAAAAACCTTCAACCAATCAGAAAAGAAAATCAGAACGCTCGCGGGCTTG  
ACATTCCTATGGGGACAGCTCTGTCTGTAAGAAAGAGGCCACCCGGGTTTGGTTCTCGGGTAGCTTGATGG  
CAACTCTCACGGGCGTGGGCCAAATTTGATTCTTTAAATTTGGAGGCTAGTTTTATGACAGCAGAAAAGTGA  
TGGGGACTGGATTGTCAGCATTGATCTTGGTGGTGGTGGGCGTTGGCCAGGGGAAAAAGAGGGTGGGGCG  
CATGTATGAGTCTCTGTTTGTAGTAGTCAGCATGGTATCCGCGCACAGCCTTGAAGAACTCGCGGAAAGT  
CTGCTTCAATCAACTCTCTGGTGTGATGATGGTAGCGGCGGCAAGGCCCTCCGCCTCCAGCAGAGTGCATTCC  
AAGTGGGCGAATTGCTGTCTGTCTCAGTCCCATATGCCTGCAAAACCCCTTCAGCAGCTTGAGAGTTTAC  
AAAGATTTCTGCCTTGTCTGTGTTACTAACAGAGAAAATAAGGGAACTACGCTCGTAGTCGTGTCACT  
GGACCACAGTAAACTCAAGGTCACTTTAATGTAAAGAAAAGGGCAACATCTATACAAGAATTCATACC  
GCGAAATGGGCAACCGGTAAGAAAAGTCACTGCCAGCTGACATCAACATCAATATCTGTTGGGTAGGAGG  
ATCTAGCTCTTTCTGATAGCCTAATGTGTGGTGTCCGAATGAGCGGTCTGGGAGCATAACCCTTAAATC  
GTAACATTACTTCAAAGCCATTTTGGCAAAAGCATGTGATTTAATGTTTTTGGCCATAACATTTCCATG  
GTGTTATGATTTTACATTAGCATCAGGATTTGTTGTAGGAAACCTTATAACAGGTCTGGGAATATAGCC  
TAGACACCAAAGTGTGCTGAAAGTGAGGGTCCAGAAAAGTAGAACATTGCACTTGAAGAGAGGAGTGTCTT  
AAGATACATTTTTGTTGGTGTATTGTCTGAGTAGAATAGTGTGAGTGGGCAATTTCTCAGCCGGAGG  
AGGAAAGTGCATTAAGCAGA ACTTGCCATTCCAAGAAAACAGATACAGTACCGTTTTTCGGGAGTAGA  
TAGGGGATGCCCCGTCAGCATATTTGAGGGGGTTACTACCATAATTAAGTGTGAGTCCAGATATTATGAAC  
CCTGGGCAGAAGCATCAATAGAGCCATAATAATTATTAGCATAAAAAGTTATTAACAGTTGTGCCATTATT  
CCGTGGCTAAGTGAACCGTGACAGTGTCAATCGTGGCGCCCGGAGGGTACCAAGTGACGCGCCAGCGGCC  
CTAAGGAAACCAATCACCCACTGGTTCAGGCATGTAATCTTTGGGAGGATTAACAGTCATTCCATAACA  
TTCTGTCTAAAGCACGAGGGTCCAGAAATGGTGACGGGGTTGAAATCTACAAGATTTGTTGTTGCAATTAT  
CAGATGATGATTAGGATCCATCCTGTCCAAGCCAGGTATCCCAAATTTGCCTTTCCACAGTTAAAGG  
AACCTGGTAGTGCGAGCTGCTTGTGAGTAACTGAGTGTGTTTTTAAATCAATCAATCCATATTCAA  
AAGTCCGAGAATGCCAGATACAGTACCATTTTCCAGCAGGATATCGCCCCGACTGAGGAGGCGAAGC  
TCTCTCTATTGTTTACAGTAAGAGACATATTACCAGATTCACCTGTAGTCCATAAACTTGAACAACCTC  
TTGAAATAAGAAAATAGGGTTTCTGTTTTGTGGTATCTTCATCTGCCAGCAGGAAACAAGGGACTTTTGC  
GTTCTTTAAACAATTCAGCAATTCTTTGACTTTGTTGTTGAGTCAAAAACAGAAATCACACTTCTTTT  
GACCCAAGTCCCATATGGTGTAGGTACCCATCATTGCTTGTGTTTTATGTTTTGTGGTTTACCTGCACCTGG  
CTATGTTTGTGCTTTTGGGTTAATCAACTGGTGTGGATATGAAGAGTTGTTGAGGAATTGTACCAGC  
AGTTAGCATAAAAATATTGACAATAGTACCTGATTGCCATTGCTGGACACTCTCCTTGTCTATTATT  
ACCAATCGCACTCATGCTCGCTGTAGGCGATTCCGAGCCTGGAGATTGCGGAGGTATTCTAGGTGCCA  
ATCATGGCTAAAAAATCAACGCATGGCTAATGCTGCCAAAGGGCTAGAATGGATATCTAACAAAAT

ENTEROVIRUS\_A\_PROBE03  
ENTEROVIRUS\_A\_PROBE04  
ENTEROVIRUS\_A\_PROBE05  
ENTEROVIRUS\_B\_PROBE01  
ENTEROVIRUS\_B\_PROBE02  
ENTEROVIRUS\_B\_PROBE03  
ENTEROVIRUS\_B\_PROBE04  
ENTEROVIRUS\_B\_PROBE05  
ENTEROVIRUS\_B\_PROBE06  
ENTEROVIRUS\_B\_PROBE07  
ENTEROVIRUS\_B\_PROBE08  
ENTEROVIRUS\_C\_PROBE01  
ENTEROVIRUS\_C\_PROBE02  
ENTEROVIRUS\_C\_PROBE03  
ENTEROVIRUS\_C\_PROBE04  
ENTEROVIRUS\_C\_PROBE05  
ENTEROVIRUS\_C\_PROBE06  
ENTEROVIRUS\_C\_PROBE07  
ENTEROVIRUS\_C\_PROBE08  
ENTEROVIRUS\_C\_PROBE09  
ENTEROVIRUS\_C\_PROBE10  
ENTEROVIRUS\_C\_PROBE11  
ENTEROVIRUS\_C\_PROBE12  
ENTEROVIRUS\_C\_PROBE13  
ENTEROVIRUS\_C\_PROBE14  
ENTEROVIRUS\_C\_PROBE15  
ENTEROVIRUS\_C\_PROBE16  
ENTEROVIRUS\_C\_PROBE17  
ENTEROVIRUS\_D\_PROBE01  
ENTEROVIRUS\_D\_PROBE02  
ENTEROVIRUS\_D\_PROBE03  
ENTEROVIRUS\_D\_PROBE04  
ENTEROVIRUS\_D\_PROBE05  
ENTEROVIRUS\_D\_PROBE06  
ENTEROVIRUS\_D\_PROBE07  
ENTEROVIRUS\_D\_PROBE08  
ENTEROVIRUS\_D\_PROBE09  
ENTEROVIRUS\_D\_PROBE10  
ENTEROVIRUS\_D\_PROBE11  
ENTEROVIRUS\_D\_PROBE12  
ENTEROVIRUS\_D\_PROBE13  
ENTEROVIRUS\_E\_PROBE01  
ENTEROVIRUS\_E\_PROBE02  
ENTEROVIRUS\_E\_PROBE03

CTAGTCTCAGTCCAGTCTGGTTTAGAGCACTGGAGCTGGTCTCAGGGAGGTGGGCTATAGTGAGGAGGC  
TCCCGGAGCTCCAAAACCTACGTCCCGGGATTCTTTGCCTGGCAGACTGCTACCAATCCTTCCATCTTC  
TTTGAGGCCATCCACAATCGAATGACGCAGACTATGGCCAATGTCCAAACAACATGATGGGCACCTTTA  
CACCTAACAAAGTCTGTTGAGAACATTGTTGGCCCCAGGTTGTAAGGGAAACCCGAAACACTTGCCTTCT  
TTGCGTCTCTTCTGTTTTTTGGAACCCCTGCGCCTGGTGGTGAATGCTAACAAAACTTCCCAGTGGC  
AAGGGGTATCCTTTAACATACGCACAGAGAAATCATTGCATGCCGATACGAAGCACAAAGATGTCGATGT  
CGTCCGCTGGAACAATGATATTTGTTGGTACCAGCATGTAACATACCCTGCCGCTGTATACTCATCTC  
TGTATTACGCCACCTACAATAATAATTCTGAGAAGGGCTACGCAGAGTGGGTTATCAACACCAGGCAGGT  
TGAGGTGGACTCTGTGGTCCCAGTGAACAACACTGACAACAACGTGAATGGTCTTAAAGCCTACCAAAT  
GCCAACATGTTCTCAACAGGACTTTGTAGGTGAGATTTGAACTACTACCCCACTGGAGTGGTAGTA  
CTGGTACCAAAACAAATATCATTGTTCCAGCGGACGTTCAAAGCACATGCGACATCTTGTGCTTCGTATCG  
GCATCACATGAGGAATCTCTAGTAAGTACATGCCTTCTTCTTCAACCATTGCCAAGGAGATATACACA  
TTAGTTTTGATTGACTAATATGGGAAGTGTCCCAAAGCTGTGACACTGAAATCTGGACACGCCTAATC  
CTCCACACTGCAACTACACTGGCAATGGTATCAGTCCCTGGGCTCTAGATTCCACCACCATTAATC  
TAGTAACGTTAACGATCCAGCCTTTCTTCTCACAGTAATCCCTAACCTCTTGAGAATCCACTGCTTGTA  
GTGCACACCGCTGTACTGTGTTAGAGATCCACGGTGAACCATGGAACAACACTGGATTGTAACCCTAG  
ACACCAAAGGTCTAATGTGAGCAAAAGGCTACTATCCCTTACCCCTGCAGTGATGATACCAATCAC  
CTCTGCGACTGCTGCAATGTGGTAACAGCTTGAGTATAGTCATGGCCCTATTGATGTTCTTTCTAA  
AGGCACAGGGCGACTGGAAGTCATCAGATGTAAGGAATTGATTGGAACCAAGGTGTGTTTATTGTTGGCAA  
TCTACTGATTGTGGGTGAACCCTGCACCAAAAGCTGTACCGAGGGATTGATGTAATGTTATTCC  
TGAACATACTGGTGGGGTTGAAGCAGGCACAACAATTCTAGTTTTGATAAAAGCAAGTTATAAACCCGCC  
CAGTCCCGTGGTTCGCGCCATTATGCTGTGGAGGCACGCCGGATTAGCAAAATGGAGAGCACAAATA  
CAATGCAGCTAAAGGGCTTAGATGGGTGAGCAATAAAATTTCCAAGTTTGTAGATTGGTTGAAGTGTAAA  
TTTTACGTTTCCAGGTTTACCTTGAATGACTTTTGTGTTTACAGAGAATTACCCTAGTACAGCCAG  
AACTGAAGCAACCAATGGAGTAAATAGCCAGGAGGTGCCAGCTCTAAGTCTGTGGAACAGGAGCATC  
GAAGTGAAGAATATGATGGAAGTACTGAAATGACACACTGATCCCAATGAACGCAGTGGACGGGAAGG  
TAGGGTTACAATCCAGTTGTTCCATGGTGCACCGTGGATCTTAACACAGTGTACAGGCGGTGTGCAGG  
AGTGGTGTCCAGATTTAGTGTGACAGTCTTAGGGACACTTCCCATATTAGTCAATCAAAACTAATAG  
CATGAGTAGCTAGCATGGCTTGCATCCTATCTGTTGGGCTAGATCCACCAGGTGGTGTGTAGCAAATGAT  
GATATCTAGCTGGATAGTAATCACTTTTATTGATCCACTGAATACCAGGGCCCTCAAAGCATACTGGGTA  
GGTCGTTTATTGCATCGGGTGTGGGTCTCAGGTGTCACAGATATTTAATTTCTTGAAGTTGGTGG  
CTCTACTAATGTGCTTGTCCACCACAGTTCAGTGGTGGGTGCATGACTATCCATCCCTTCTTCTGGCA  
CTCTGAGCCTCTCCACTCCACTAGCGTCATTACATTGTTAATTTCCATCATAGATTCAATTTGCACTAT  
CAACTATCCCTCACCGCCTGCGGTGACGAGTCTATCACTCCATGTGAGCAGACTAAGAGGCCCCCGCA  
CAAAGATTCTCCAGAAAGCCAGAGAAAAGCATGAATTTGTACAAAAGCTCAAGCAACTGCCCGTCAATGA  
GCTCCTTTGTATGCACTAGAAGCTAAGAGGGTTTCTGCCTTAGAAAAGGAAAATTAACAACACTACATCAGT  
GCTAACGTTGCCACTGGAGGCTCAAGCATAACTTACAATCAAATAAATTTCTACAAAAGATAGTTATGCAG  
CTCCCATGTGTGCTGAATACAATGGGCTTAGAAATGCCATTACACAAGGAGTGGCCACTTGCTGTGGC  
ATGATGTAATGCTAGTTACCCACATGAGATAGACCCTGGCCTATTGGCAAAGCCGGGAAAGAGTATGG  
TCCTGCCAAAGTATGAAGATGATTACAATGATGCAATCCTCAGCGTAAACACTAGCAAGTTCCCAAACAT  
TAGAATTGCAGTTGTACCCACCATGCATCAGTTGAGGAAGAAATTTACATTAATGATGTTCCAGTAAAA  
TAGTGCGGGTCTCAATCATGCTCTCATCCCTGGCAGTTGACGTGGCACCAGTCTCAGCGGCCTGCAGGGC  
CCTGGGTGAAGTCTTGTGTTTCTGCGCTGCAGAACCGCGTGGCTGTAGTAGTTAATGTTTATAAT  
GGTCTTCAAGTATGCCTGGGATCTTTCGTCCACCGAATGGACTCATGGATGTTGACATGTCATGACCGG

ENTEROVIRUS\_E\_PROBE04  
ENTEROVIRUS\_E\_PROBE05  
ENTEROVIRUS\_E\_PROBE06  
ENTEROVIRUS\_E\_PROBE07  
ENTEROVIRUS\_E\_PROBE08  
ENTEROVIRUS\_E\_PROBE09  
ENTEROVIRUS\_E\_PROBE10  
ENTEROVIRUS\_E\_PROBE11  
ENTEROVIRUS\_E\_PROBE12  
ENTEROVIRUS\_E\_PROBE13  
ENTEROVIRUS\_E\_PROBE14  
ENTEROVIRUS\_E\_PROBE15  
ENTEROVIRUS\_E\_PROBE16  
ENTEROVIRUS\_G\_PROBE01  
ENTEROVIRUS\_G\_PROBE02  
ENTEROVIRUS\_G\_PROBE03  
ENTEROVIRUS\_G\_PROBE04  
ENTEROVIRUS\_G\_PROBE05  
ENTEROVIRUS\_G\_PROBE06  
ENTEROVIRUS\_G\_PROBE07  
ENTEROVIRUS\_G\_PROBE08  
ENTEROVIRUS\_G\_PROBE09  
ENTEROVIRUS\_G\_PROBE10  
ENTEROVIRUS\_G\_PROBE11  
ENTEROVIRUS\_G\_PROBE12  
ENTEROVIRUS\_G\_PROBE13  
ENTEROVIRUS\_G\_PROBE14  
ENTEROVIRUS\_G\_PROBE15  
ENTEROVIRUS\_G\_PROBE16  
ENTEROVIRUS\_G\_PROBE17  
ENTEROVIRUS\_H\_PROBE01  
ENTEROVIRUS\_H\_PROBE02  
ENTEROVIRUS\_H\_PROBE03  
ENTEROVIRUS\_H\_PROBE04  
ENTEROVIRUS\_H\_PROBE05  
ENTEROVIRUS\_H\_PROBE06  
ENTEROVIRUS\_H\_PROBE07  
ENTEROVIRUS\_H\_PROBE08  
ENTEROVIRUS\_H\_PROBE09  
HEPATITIS\_A\_VIRUS\_PROBE01  
HEPATITIS\_A\_VIRUS\_PROBE02  
HEPATITIS\_A\_VIRUS\_PROBE03  
HEPATITIS\_A\_VIRUS\_PROBE04  
HEPATITIS\_A\_VIRUS\_PROBE05

TCATGAAGGGTACTGAGAATTGGGCAGGTGGTCCGTCGGTGTCCGCGAATACCGAGGGGTTGCACCCAGA  
AGTCGTACCATTTCTCTCGAGCGCCTTGAATGAAGGTAGATGGAGGGCTCTCCCGACAGGAACGGAACG  
TGAAGTCAATGCGCCAGTTGGTGATACTGGTGCCAGTGGCCAGCAGCGGCATACCCACGAGTGAGGAGCG  
CCAGGTTGTACCTCTTCTTGATGGTGCTTGTCTGGGTGCACGTGGGATCCAGCAGCTGGTGTGTTTTAT  
TTGAGCCTCCGGTAGCGTAGGTTCCAGTAGTGTGGCTCCCGCAGTATTTCTGCTCAACTGGGCTCCCAT  
CTGGCAATCTTACCAGCGTAGCTACTTGTACTAGAGTTGATGCTCACGGGTGTGACACCATCGTCCGA  
ATCCGGTCATGGACATGTGCAACATCCATGAGTCCATTCCGGTGGACGAAAGATCCCAGGCATACTGAAGA  
CAAAGATCCGTTCCGTTCTGTCTGGGAGAGCCCTCCATCTACCTTCATTCAAGGCGCTCGAGAGGAAATG  
TTCCACACCAACCCTGGAACCATCTCCGGCTGTGCCGTTGGATGCGACCCTGAAACCTTCTGGAGCAA  
AAAATATTGATTTGGATGATCTTAAGATAATAGCCTACGGGGATGACGTGCTCGCGTCGTACCCGTATGA  
TTGATGATGAATCCCCACCAAGGCAGGCCAATGCGGTGGTGTGGTTATTAGCATGGGTAAGATAGTGG  
ACATGATGCCACATCAGTGGACAAGCCCACTGAAACAGGTGTATCAGCGGAGCGCTTTTATACCCTCCG  
AGCCCTTCTGGCTCGAGGATGGAACGTCTTAAAGAACTCCCTGATCTATCCGCACCAAGTGCATCACT  
TGCTCGGAGAGTGTGGAAGACTAGTTTTGCCAGCTTTGGCCAATTCAGCTGGGTCAATTCTGTGA  
GTACTGCTACCACTAGTAATGTCCCTGATGAACTTCGTGGCATTACATTGCACGTGTATAGACCACCC  
TGCGTGCATCTCTGGTCCACCTGATAGATTGTAATCTCTTTCATGGGCATAACCGGATGCACAAGAAA  
TTCCAGTGCCAGCTGTGCCGTGAATCAGGAGACATACAGGCTCAATCCGTTGCTTCTTGAATGTAT  
ACTACCATCCATCATTACTGGAATCTTGTCTCCAAAAGGTATCTGGGTACATCCAACAGCGCATCCAGT  
CTACCACGGCCTGCTGCTGGTATCCGTCAAATGGTCACTGTCTGGAGGAATCGCATAAACTTCTGAGTG  
GTGGGGCATATCTCTGCAGTGGTGGTACTAGTACTGAATGTTTCAAAGATGGTCTCTCTGTTGTTCACT  
CTAGACTGGTTCCTCCTCAAAGTTGATGGATTGACCTCTTCTCCGCTTTTCTGCTTTTCTGCTAAT  
AGAATATGAGCACTCAGAAGTTTATGCGATTCTCCAGACAGTGACCATTTTACGGGATACCAGCAGCAG  
CATTGATACCATGATCTCAGCGATGAGAGCGGAATGGAAGAGGAGAAATCAGGTTGGGCTCTGTTATGTA  
CTGAAAATTATAGCGTATGGGGACGATGTCATCGCCAGTTACCCATACAGAATTGACCCAGCTGAATTGG  
AGGCGGCAGAAACGGGGCGCCAGCTCTAATGCTAGTGATGAGGGCATGATGGAACTAGACATGTCGTCAA  
AGTACATTAGGAACCCAGTGTTTGAGACCCAGGACAGAATTGTACCAACAGGAACAACATAACCACGCAC  
CCTATGGTGAATGCCATCGTACTTAAGTGATTTGGATGCTACCGCTGTAGACAAGACTACCAACCAGG  
ATTCGTTGGGATTACCATTACATTGGCCCCCATGTTTTCAGAATTCAGGGCTACGCAGAGCAATAGCC  
AGGCACTGTGTCAAGTTGAGTCCCTACTGGAAATCAACAACGTGGATGGTAAAACAGGGATTGAGAGATT  
TGGTGCACAACCAATTTCTCATTGAGAATTCTAAAGGATAGACCTGACATTACACAAACAGCAGCATT  
TTTCCACGCTCATCTCAGAAGTGCATGACGATTCTGCACGGCCCCGCTCTCAATGGTGGACTCAACACT  
ATGTGGTTACCGCTTGATAAATGATGCTGAGTTTGCATAATCACGGGAAACCGTGATCTCAGTAGGAGT  
TCTCTATATTAACATCAAATGGAACCGCCTGTTTACAGAGCCTTGCTATCTGATATTGTGGGGCATGTAT  
CTGGAACTATCCAGCCCCTTCTGTCTGCAATAATCTCGGACCTCCCCTGAGTCAACGCTACAGAGAAGATC  
CTGAAATACTCTCGGCTATTGCACGGCCAATTATTGAAGTTGCCACAGACTTCCAGCACCAGGACTCCC  
GAACAGCCCAATGCTAAAGTCACTACTAGACTCACGCGTGTGAGACACTACATCAGTGATTACTTTTTTC  
TGTGCCAAGCCAAATAGCACAGGGAGGTGACATGTTCTTGGGTGTGTTTTGCATTTCTGTCCATCTAAT  
AATCCTCGACCACAGCTACTTCTGATTCACTGTCCGCGTGTGCCAGACATGATATAATTGGTAAACAGT  
TGTCAGCCGGAGTCATTGTTAGACCATAGTCTCGTCCAGCAATCGCCAATTTCCAGCATCAATCTTATA  
ATCTCATTGGACATCCTGACACTAACTGACAAAAATCTGACCAATCCTCATCTGTTGTGTTTTGGCCAAT  
CTGAAGCATTAAATGAAACTGAGCAGCCAAAGTTGGAATAGATGTCCAAGTAGTAAAATGAGTAATTTT  
TTGCTTCTTAAACATAAACTGTTTTGGACTTGGATTGACCAATTTGAAGTTGCTATTATAAAAGGAGA  
CAACATTACCAGCTGAAATTGAATGAAAGTTCCACCTCTATTAATAAACTCCATCATCTGCAATAATC  
CCCCACCACATTCAGGAAGACCTTCGCCTTTTCTCTCCATGCCTGATCCACAGTTAAATCAACTGT

HEPATITIS\_A\_VIRUS\_PROBE06  
HEPATITIS\_A\_VIRUS\_PROBE07  
HEPATITIS\_A\_VIRUS\_PROBE08  
AICHIVIRUS\_PROBE01  
AICHIVIRUS\_PROBE02  
AICHIVIRUS\_PROBE03  
AICHIVIRUS\_PROBE04  
BOVINE\_KOBUVIRUS\_PROBE01  
BOVINE\_KOBUVIRUS\_PROBE02  
BOVINE\_KOBUVIRUS\_PROBE03  
BOVINE\_KOBUVIRUS\_PROBE04  
BOVINE\_KOBUVIRUS\_PROBE05\*  
BOVINE\_KOBUVIRUS\_PROBE06  
HUMAN\_PARECHOVIRUS\_PROBE01  
HUMAN\_PARECHOVIRUS\_PROBE02  
HUMAN\_PARECHOVIRUS\_PROBE03  
HUMAN\_PARECHOVIRUS\_PROBE04  
HUMAN\_PARECHOVIRUS\_PROBE05  
HUMAN\_PARECHOVIRUS\_PROBE06  
HUMAN\_PARECHOVIRUS\_PROBE07  
HUMAN\_PARECHOVIRUS\_PROBE08  
HUMAN\_PARECHOVIRUS\_PROBE09  
HUMAN\_PARECHOVIRUS\_PROBE10  
HUMAN\_PARECHOVIRUS\_PROBE11  
HUMAN\_PARECHOVIRUS\_PROBE12  
HUMAN\_PARECHOVIRUS\_PROBE13  
HUMAN\_PARECHOVIRUS\_PROBE14  
LJUNGAN\_VIRUS\_PROBE01  
LJUNGAN\_VIRUS\_PROBE02  
LJUNGAN\_VIRUS\_PROBE03  
LJUNGAN\_VIRUS\_PROBE04  
LJUNGAN\_VIRUS\_PROBE05  
LJUNGAN\_VIRUS\_PROBE06  
LJUNGAN\_VIRUS\_PROBE07  
LJUNGAN\_VIRUS\_PROBE08  
LJUNGAN\_VIRUS\_PROBE09  
LJUNGAN\_VIRUS\_PROBE10  
LJUNGAN\_VIRUS\_PROBE11  
LJUNGAN\_VIRUS\_PROBE12  
LJUNGAN\_VIRUS\_PROBE13  
SALIVIRUS\_A\_PROBE01  
SALIVIRUS\_A\_PROBE02  
SALIVIRUS\_A\_PROBE03  
SALIVIRUS\_A\_PROBE04

CACCACCCTGGGACGGATCAGATTTCCAATCTTCTGATCCAAAGCAAAGACATCTTTGCTCTTGCATC  
CACCATAATGTTTACAAATTTGGTTGCCAATGCAATTGATGTTAAGCTCTTCTCCCTCTTTTGCC  
CAGAAATCCAGGGAACACGAAATCTCAAAGTTGACTGCACTCTGTAATATCCATTAAGTGCACAAGGAGC  
CCATGGTGGAGGTGGCAGCGGAGACTGGGACCTCCGCCATGTAGAAGTTGGAGAGCATTGGCGCGTGGG  
TTCCCATGACCCGGAGGAGAGCTGGCCAAAGTTGGTACCTGACCAAGTCTCCCATCCGAAGTATGAGGT  
AGCACACACCAGCGGCCGTAGTGCTGAGCGGAGCCAGTGAAGAGGAGGTGGGCGCGGAGTTCACCCGG  
GAGGGAGTTCCTGGCCAGCCACGGCAGATCCGAAAGTGCCCGCACCTGGGACGGCGGAGTCTTCCAGTG  
GAATGTCCTCAGGGGGCTTTTGGTATCTGGGTTTGGGGTCAAGAACACCAGAGTGAAGTGGACAGGGATC  
AGGAGTTGGAAGCAGATAAGAAGGCGTGGATGGTAGCACTGGGAGGTGCTGCAGAAGGTGCAACAAGGGG  
CGTCAACCGCGGGGTCCACGTAAGAATAGAGGGTTTTCTCACGTGTCTCCACACGGAATCTGCGCCACGA  
ACAGGGTGAGTTCACCACGCCACTGTGTGAAGAGGTCCAGGACGAAGGAGATGGGTGTGCCAGATGCAGA  
AACGGCGCAGGTTGGTCTCAGGAGTGGAGGGATTGTGAGAGTACTGGAAAGTGGTGCCTGGCTCAGGTGT  
AGGCTGCCGGTGGAGATGGTGAAGGCAACCCGGGGATCGCCGCGGAAGTAGGTGAAAGTGGAAAGCAA  
TGCGTGAAACCGGTCACCTCAGCTCCAAATGATTCTGCCATGATACTTTGCAGTCTCTCTGTTTCTATTC  
CTAAAGGGCCATCATCTTGTGCTGAGGTTAGTCCCAATTCTGTTGGTGAATGGTTTGTCTTACAATCTTC  
CATGGAGGCATAACTCCATCAAGTAGGATTGGAGTTGCTGCTTAAATGTGCTGAAATTTTTCATCCACAT  
GTAATGTAATTATGCCACTGGATGATAAAAAATTGGTTCTGTTTGTCTCAGTGTGATATGTCCAAC  
AGCTAAGGAATATCTTATCTACCAGAGCTGGTACCAGTTAGCAATGGTTTACACAGTAAATAACCTAA  
ATCCATCATATTGGGAGTAGTCCATTTATAATTGTAATCATTGAGTGCATTAATCATGAAGTGCATC  
AAAGGACCAGACAAAAACAAAAACAAGAATTTATCAGCGTTACAATGATTGTTTGTCTAAATTTAA  
CACCACAAATAAACCTGATTTTCCAGTACAGTCTTATTAGATTAGGTGCTCTGAGGAGAGGTTTCCA  
CAAAAGTGAAGGCAATTTAAGATTCTTGGTATGCACATTGCTGGGAATGGTGAAGTGGGTGTAGCTAT  
CCTCAGCACAAAGATGATGGCCCTTAGGAAATGACAAACCAAAATTTTTCTTAACTTTAAGTCTATGAA  
GGTGCCCTATCACTTCTGTTTGCCTACTTTACTGGTGAATTAACATCCATGTTCTATTTCTTAGTGATA  
TTAGCTTGAGATGTCAAAATTTCTTTCCCTTACCAGCACCAAAACAGCAACACGTAATATAGAGG  
TGGAGCTGAAGTGACCGGTTACGCAAGGACGAACCACCATGAAACCAAGGATGGAGGTTGAATTC  
GGATTGATTGCTTACCAATAGTTTATGGGGATGATGTCATCTTATCCCTTGACAAGGAAATAGAACCAGA  
TGTTAGGCACCATGAACATTGCATCATCCCCATCTTAATCTGAAGAATGCAGTTGACTGCATTTGGGGA  
CATAGAATGCTCTTCCACCAACCAAGGCAATAGTTTACCACAGTTGTGGAGAGAACATTAGCGATGTT  
CTTCATCCACTCGTTCATATGCTTCGAGACGTGGCTTCCCTGGGCGCAGGTAGTGGGAAGAAAAAATT  
CTTCTGGATTAACCTTGAGGCGGAGCGGTGCATCTGGTGTCTAGCTTCCAAGACAGCTTCAAGTTCTTC  
AACATCATATAAAAAATGAAGGATCCAAAAGAACAGCGGAGAGCATCAACCATTAGTGAATACTTTGAGG  
AAATGATGAGGGTCAATGTTAGAGTGCCTGCGAATACTGACTTGACTAGACTGGAACCCATTGGCATTG  
CTTGCGCATTAGAGCTGTAGCCAGCTATTGCGCAACAACAACTAGATGTGGCCCGTTCAATGGCGGCC  
ATTTTGAATCAATGGCGAGTGCATGCAGGACTATGAAGTGGCCCTGCATCGCATGCTACGCTATGTTT  
ATCTATCAAACCTCCGGCTCAGGAGTTGGGCTGGCAGTGGGAATGAATCCCTGGACAGATTGGGATCCAA  
CAAGGGGAAGAAGCTGCGACTGAAGTTGGTCTTAGGGCAACAGAAAATGATGGCAGTCTTTCAGAACAA  
ATCCAGAAGATCCTTTGAAACAATTGCGGGAGGCGGCAAGGCTTACTTTAATAATGCACAGTGTGGA  
GGAGATCGCCAGAATGCCAAGTGTGTTCTTAGGAGAGAGTACTGAACAGATGGTTCGAAGGGGCTATTT  
CCAAATGCAGTCAACTGCATTTCTCAGATTAAGATGGGGATGATGCAATGTTTATGGTGCCTACCACAT  
GGTCCAGGGTAGGTTCTCTCCAAAGAGTGGCGGGCAGCGTACTCGAGCCAATTGCGCACGCGCCCGGGG  
GCTGGATGTGGGTGACAGAGTTGGCAGCGTGGGAGAGGGTAAGAAGTTGCTTGGCCAAATCCAGGTTGGA  
TTGGACTTCTGCGCCATCAGCTCCAGCTGGAAGGCAAGGGCAGGACACTGTGGGAGGCGGAGCTCAAAA  
GCGAGAAGCAATGCGAGAGGCAATAGCAGAGGAGGACAGAGGGGATGGTGGCGTCAAAGCAAGAGTAA

SALIVIRUS\_A\_PROBE05  
SALIVIRUS\_A\_PROBE06  
SALIVIRUS\_A\_PROBE07  
SALIVIRUS\_A\_PROBE08  
SALIVIRUS\_A\_PROBE09  
SALIVIRUS\_A\_PROBE10  
PORCINE\_SAPELOVIRUS\_PROBE01  
PORCINE\_SAPELOVIRUS\_PROBE02  
PORCINE\_SAPELOVIRUS\_PROBE03  
PORCINE\_SAPELOVIRUS\_PROBE04  
PORCINE\_SAPELOVIRUS\_PROBE05  
PORCINE\_SAPELOVIRUS\_PROBE06  
PORCINE\_SAPELOVIRUS\_PROBE07  
PORCINE\_SAPELOVIRUS\_PROBE08  
PORCINE\_SAPELOVIRUS\_PROBE09  
PORCINE\_SAPELOVIRUS\_PROBE10  
PORCINE\_SAPELOVIRUS\_PROBE11  
PORCINE\_SAPELOVIRUS\_PROBE12  
PORCINE\_SAPELOVIRUS\_PROBE13  
PORCINE\_SAPELOVIRUS\_PROBE14  
PORCINE\_SAPELOVIRUS\_PROBE15  
PORCINE\_SAPELOVIRUS\_PROBE16  
PORCINE\_TESCHOVIRUS\_PROBE01  
PORCINE\_TESCHOVIRUS\_PROBE02  
PORCINE\_TESCHOVIRUS\_PROBE03  
PORCINE\_TESCHOVIRUS\_PROBE04  
PORCINE\_TESCHOVIRUS\_PROBE05  
PORCINE\_TESCHOVIRUS\_PROBE06  
BK\_POLYOMAVIRUS\_PROBE01  
BK\_POLYOMAVIRUS\_PROBE02  
BK\_POLYOMAVIRUS\_PROBE03  
JC\_POLYOMAVIRUS\_PROBE01  
JC\_POLYOMAVIRUS\_PROBE02  
JC\_POLYOMAVIRUS\_PROBE03  
JC\_POLYOMAVIRUS\_PROBE04  
JC\_POLYOMAVIRUS\_PROBE05  
JC\_POLYOMAVIRUS\_PROBE06  
JC\_POLYOMAVIRUS\_PROBE07  
JC\_POLYOMAVIRUS\_PROBE08  
AVIAN\_ORTHOREOVIRUS\_PROBE01  
AVIAN\_ORTHOREOVIRUS\_PROBE02  
AVIAN\_ORTHOREOVIRUS\_PROBE03  
AVIAN\_ORTHOREOVIRUS\_PROBE04  
AVIAN\_ORTHOREOVIRUS\_PROBE05

GCGGCCGTAGCACTGAGCAGGACCAGTGAAGATGAGAGAGATCTGTAGAGAGCCACGCCATTGGGAGAAG  
GTTACCACCGACCATGGTATACCACAGGGAGTCATAGACATGGTAAGAAGTAGTAGTGTAAAGAGAGGTAG  
TCCTCAAACCTCCCGCCACGCAACCACATGATTGAGTTGGTGAGGGTTTTGCTCATCCACGACGGGATGGA  
GAGTTTTGGTCCTGGGGTCACTTTGACGAGGACCCCAAGCCACTCGAGAAGATTCTTGATGTGGGACATA  
GTGGGTGACAGAGTTGGCAGCATGCGAGAGAGTGAGAAGTTGCTTGCCAGGTCCAGGTTGGACCGAATG  
AGGGAGGAGTCGAGGAAGCAGTGACAGAGTCAGTGTAGAGTCCAGGATCTTTTCATGCTGAGAGGTTGAG  
CTGTCACCCATCTATTAGAAGAATCAGAAAGGAGGAAAGGGTTCCTGAATGTTGTGGATGCAATCTTTCA  
TCATAGTGTTACCTAGGCATGCCTATGTGAGTGGAAACATAGTGTAGATGGTGTGGATGTTCTGTAGT  
TACACATCGGTGGTGTGGAACCAGAGGGTTGCAGCCCTGTTGAAGAGAGACTACTTTGTCAACAAACA  
ATGGAACTACTACTACTCTTTTCACTTTGCAACTGGATCCCAAGAAACAGAGAGCCCGTGTGTACCTTA  
CCAAGAAACAGAGAGCCCGTGTGTACCTTACCACCAGTGTACACACGAGAAGTCGATTGGACCGTACAC  
ATTCTGAAAAGGGGTTTCAAATTTGATGAAGAGTACCCCTTCTGTGTATCCTGTATTTCTATGGAG  
GGTTGGGTTGGCTGCAATCCAGATGTTGACTGGTCAAAGTTGCGCGAAATTGGTGTGATCCCTATGTTTGTG  
GGCAGGGCAATAGCAGATAAGTTAGATAATCAGAGACCCTATACCTTCCACCCGATCCCAACATTTTG  
ATCTCAAATCTGTCCAAATACACCGGTGTCCATTAGACCCCAAGCAGCGGTAAGACCATTCTCCAAT  
CATTGTGCCATGCCAATAGACACAGCGAGGTGACATGTTCTTGAGTGTAGCTGGCATTCTGGTCCATCT  
TGGGTAACCTGCTCTGTTGGATAGTTGTTACCCTGGTATGTTACACCATTCTGTATTCAAATCCATTACT  
ACTTAAATTTGTGTGCTTCTGAAACTCTGGGTAAATGGGTATGCCATTATCTCTATGTGTTGTCATAAA  
ACCTCAAGCCTGCAAACCTGGGAGCACATTGGGGCAACGCTAACAGTTATGGGAACAAAGGTAGAAGCACC  
ACTGACATGTTGTTGGGCACCTGGGGTACAACCAGTGTCTGTTTGTGGAATACAGTATCCCATCCATT  
CTGTGGCCATCTGGCTACCACAAAACATAAACTCAGAAACAAACAGATCCCTCTGTAATTTGCATACATCTG  
CGTTTGGATCCAATTCATAGGGATAGGCAACCAATAAATCATCACCATAACACAAAATAACAACACTCATC  
CATGAATCCCAGGCCGCGGACAAAAGAGTCTCACATTTTCAAATTTCAACCACACAGAAACAGCCAATCC  
ATGGTTCAAGACGCAGAAGTGGTGCCAGTGGTCTTGTTTAAAAGCAAATCTGAATTATATTTCAACTC  
ATGAGTGGCTCTTATCTTTGCGTTTCAGAGAGAAAATTTCAAACATGCCATGGTGAGTTTCAACTGACT  
CGGGGTTCTCATTGAAGCACTGGGTGCCATTGCCTGTGCATCCCGTCTCAGCTGGCTGAAGTGGAGA  
AAGTACAGACGGCCAGCCGCGACCCTGTCAGGCAGCACAAGTCCAGTCCCTGCATTCCCATACAGGAACTC  
TTGCTGGCATCACTCTCACAGCAACAGATAGCCACATCTCAAATAGGTGGCATGTAGGGACTGACGTAT  
GAATATCATAGTACTCATCTGGGTTAAACAATTCAAAAGCCATGCCTGATTGCTGATAGAGGCCTACAGT  
AATATTGTTGAATATAATTATAAAAAGTTTATAGGGGCATTTACAATTGTCCAGGTAGTTTCTCCAAAAA  
ATCTTTCTGTTCTTCTGCAATCCTGTGAGGTTATAGAAGGTATATCATCCCTAATAACATGCCACAA  
TTCCCTCCCTTTGGGCAACTTGCCTTACCATAGAGGGCCTAACTGGAGACAATCTAGAATAATAGTCTGA  
CCATGCCATACATAGGCTGCCATCAACTCTAGGAGTCCCTTCTGTTAATTAATCAGTAAGAAGGAAAGA  
AGTCTTCTGGATTAATAAATTGTAAGCCATAGCTGGCTGCTGAAAAAGCCCAACTGTTGAAACTTTATG  
TGGTGGGATCAGGAACCAACATTCAACAGGATATGCTTTGTTCTTATCTAGGTACGCTTGTGCTCTGT  
AGGTTAAGGCTGGCAAATCATCTTAAACAAGATTCCAAAAAGCCTGGGAGATTGTGGAGAACAAGGACGG  
AGTCACTTTCAAATGTATCTGATATAGATATTGACTTACTAAAACCCCTAAGATGCTCATCTGGGTCAAC  
CATCAAGCAACACTGTTGTGGCAGTGTGTTATATGAAGAAGTGGAGGAACATTTCTCCTCCTGTTAG  
AGGGGTTTTTAAACCTCCTTTTCTTAGCTGCACCTTAAATATCTGGAGAGTCCCTCTCCACTGCTGGGA  
CCCAACCAATCTGTTACGGATAGGGGGCGAAAAACCTGGAAGAGACCCAGCTAAAAGAGGTTTAAAT  
GCGTTAATATCCATCGTCCGTATTTTCTGCTGCCAACGTAGCAGCTTCGGCTTCAGACAACCCCTACCATCA  
AGGCTGTCTGTGCATTCCAGCAAGCAGGAGTCTCAAATAGCTAGATGTTATTCCTTCAACGAACGAGTG  
GAGTGCAGTAAGGACGACGCAAGGTTCAACAGCCGTATAGCAACACCCGACCTAGGACATGACGATG  
AAGCTGACTTTGACCACCCACGCCATGATTCCATAAACAGATTTCTGTAGTGTGACGCCCTTCTTACCACT

AVIAN\_ORTHOREOVIRUS\_PROBE06  
BABOON\_ORTHOREOVIRUS\_PROBE01  
BABOON\_ORTHOREOVIRUS\_PROBE02  
BABOON\_ORTHOREOVIRUS\_PROBE03  
BABOON\_ORTHOREOVIRUS\_PROBE04  
BABOON\_ORTHOREOVIRUS\_PROBE05  
BABOON\_ORTHOREOVIRUS\_PROBE06  
BABOON\_ORTHOREOVIRUS\_PROBE07  
BABOON\_ORTHOREOVIRUS\_PROBE08  
MAMMALIAN\_ORTHOREOVIRUS\_PROBE01  
MAMMALIAN\_ORTHOREOVIRUS\_PROBE02  
MAMMALIAN\_ORTHOREOVIRUS\_PROBE03  
MAMMALIAN\_ORTHOREOVIRUS\_PROBE04  
MAMMALIAN\_ORTHOREOVIRUS\_PROBE05  
MAMMALIAN\_ORTHOREOVIRUS\_PROBE06  
MAMMALIAN\_ORTHOREOVIRUS\_PROBE07  
MAMMALIAN\_ORTHOREOVIRUS\_PROBE08  
MAMMALIAN\_ORTHOREOVIRUS\_PROBE09  
MAMMALIAN\_ORTHOREOVIRUS\_PROBE10  
MAMMALIAN\_ORTHOREOVIRUS\_PROBE11  
MAMMALIAN\_ORTHOREOVIRUS\_PROBE12  
MAMMALIAN\_ORTHOREOVIRUS\_PROBE13  
MAMMALIAN\_ORTHOREOVIRUS\_PROBE14  
MAMMALIAN\_ORTHOREOVIRUS\_PROBE15  
MAMMALIAN\_ORTHOREOVIRUS\_PROBE16  
MAMMALIAN\_ORTHOREOVIRUS\_PROBE17  
MAMMALIAN\_ORTHOREOVIRUS\_PROBE18  
MAMMALIAN\_ORTHOREOVIRUS\_PROBE19  
MAMMALIAN\_ORTHOREOVIRUS\_PROBE20  
MAMMALIAN\_ORTHOREOVIRUS\_PROBE21  
MAMMALIAN\_ORTHOREOVIRUS\_PROBE22  
MAMMALIAN\_ORTHOREOVIRUS\_PROBE23  
MAMMALIAN\_ORTHOREOVIRUS\_PROBE24  
MAMMALIAN\_ORTHOREOVIRUS\_PROBE25  
NELSON\_BAY\_ORTHOREOVIRUS\_PROBE01  
NELSON\_BAY\_ORTHOREOVIRUS\_PROBE02  
NELSON\_BAY\_ORTHOREOVIRUS\_PROBE03  
NELSON\_BAY\_ORTHOREOVIRUS\_PROBE04  
NELSON\_BAY\_ORTHOREOVIRUS\_PROBE05  
NELSON\_BAY\_ORTHOREOVIRUS\_PROBE06  
NELSON\_BAY\_ORTHOREOVIRUS\_PROBE07  
NELSON\_BAY\_ORTHOREOVIRUS\_PROBE08  
REPTILIAN\_ORTHOREOVIRUS\_PROBE01  
REPTILIAN\_ORTHOREOVIRUS\_PROBE02

ATGTGACAGGAAGATCAGTCGGCAGAAAAGACAACGGTCGCGCTTCGGGTCCAGTCCCAGATCCAACCA  
TAGCCTAAAAGATTGTATTAATTAACCTTAAAGCTAAATCATTATTTGAATCAGCAACTAAAGCATGATTA  
CTCAAATCCTTACCATAACAATCACTCAATAAAGTTTTGAGAATGTCAGCAGAAACACGAGACGTGGGG  
GTGGAACGTTGCCAGCCAATGGCGCGACAATCAAATCAGTACCCAATAAATATTTCTTAATATCACCATG  
GAGTAGTGAGTATCTGGATTGCGAGATAGCAATACCATCATGTTTCATATATATCCAGTATGGCATCCAA  
TAACCAATAGAGAGTATTTTGATTCATCAGTCTGCTTCATCAATCTTTTCATCGGGGGTAAGTATAAAGT  
GACTTTCCGCGCTGCGTGCATGCAGTCTCTACATGGTCAATGAACTCAGAGCCCAACCTGCTCAGTCAAA  
TCCATGATGGTTATAATTAAGAATAAAAAGATTCTTCACTCACACCCCTTCTCTTAGTAAAAAAGAAGAA  
TTCATTCTTTTTCATTCTTACCACCTTTTTCAGTAAATGCAGTCGACTCAAAAATGTCTGATCTTTACGACCA  
CAGCAACTCCAGTCGCAGTATTACCATTCCAGCACCTAAGAATCGTAAAATGGCCCGTAACCATCCCAT  
TTAAGGGCATAATGGATCGTGGCCGCTCTGCACCTGGTTTCGCAATCCCATCGAAGTGTGAGTGTAGTAT  
GGTACGAACGTTCCAACATCCACTAGGCTGCGCTGTAGGCCGTATGTCACGCATGTGACTGGAGAGGTT  
GTCCATATTTCTCGCCAAGTCCCGCGCTTTTATCATTTGACGGCGCCGACCTAGCATACTTAGTGGGA  
CAACGTCCAATCACCCTTAGTGCATCAAACCTGCGCAGACACTTGGGGAATCATCGCAGCATTGACATCT  
CCCACCACCAAGACACCGGCACATGTCTTGGCGACCACATCAGCTCACTACCCATTACACGCGAATCGG  
GCCTAGCAGCTCTCACTCCAACGACAGACTCATTTACAATGGATGCAGGAACCCCCATAAACGGTTT  
TTCAAGGATTTTAGCCTCTGGTCCCGTCCCAAGATCTAGCACAACGTCTCCATCATATACCGCTGACGAC  
TCAGTCGTGAGGTGTGTGGGGGGACCCCTCACTCCAAGACGATCAGATAAGGGGTGCAATCGCGGCACT  
CTGAAGAATTCGCCCCGTTCTTTCCACGATTGGATGACGACTAAGATTTGGAATTCGACAGCCAAATAT  
CACCAAGAAGAAGTACTCCAGATGTCCAAGTAAGTGTAGTGTGATGCACACCGAAACGCGACGAAG  
ATACTGACGCGTTCGTGTCTCAATAGTGGGTGAAGTAAACGAGTCTGCAAGTCTCACCCCAACCGTTC  
CATACATCTGTTAAACAGTTATTGAATACTGAGACTTTATCGGTGCGAGGGCGCCAATCCGTTGATGTTT  
GACGTGCAAGCGCTTTCTCGACGCTCATACTTGCCGAGATGTTTCATGAACATTCAATTGATTTCTCC  
GGCTGAATTGGAGGGTACAGGTGAACTCCGACATTTTTATTGTAGATGATTACATACATATATGTCTTCC  
TACTTCGGTACGTGTTGAGGGGGTGGCTCAATTACGCACTCAAACAGTAAGTGGCCTGCCATGACCGT  
ATGCAAAACAAACGAATCATCGCTCTTGAGCAAAGTCGGGATGACTTGGTTGCATCAGTCAGTGTGCTCA  
GACAAGCTCGAAACGTGGGCGAGAGAAGACGATCAATATAATCAGGCTCATCCCACTCCACAATGTCC  
ACCACCGATGGGGAGACATTAGTTCTTACGCTTAGTGTGGTCAAGTCTACTCTCGATGGATTAGTCGT  
ATTGCATACACATTGTGTCAAGCCTCGGCTAATAGGCCTTGGGAATATGACGGTACATATGCTAGGATGA  
TCAATTTGATCCTGAGTTCAACGTTGACGGGGTGTGTTGTTGGGTTACAGCTGCCACTGATTGACAA  
GCAACAGGCACCAATCGTACTGACTCCCGCTGCTCTACAATGTTCCAGATACTACTAAATTTGGGGAT  
TGAATGATGTGTACCAGAAGATCTGGATCGTGTACGCACTGAAGGAGGTTCCCTGGTGGAGTTGAATG  
TGAAGTTGGAGGGCGACGCTCGTCAAACCTCAATTTCTAGGACTTTTACTCAAGATCAAATTTGGAGTG  
CTCATTATTCGAGAGCAACCACTCCGATTCTTGAAAGATGCCAGCTGTGTTTCTGGGATGCTGACTGG  
CTCTTTTCGCTGCTGGGACTGAGTGGTTCTGTATAGTGAACGACAACGTGAGAGGAGAAACCTCGAGA  
GACCAACTAGCAGCTTCGAGACCAACGGGAGTCAAGTACGCGGCAAGTACCAGGATGATGGCAAGT  
TAATATTCAGTCTCTGACCATTGGTGTGTAGAACAAGTCCACGCCTCATCACGGACACCACGTGTCTT  
CTAGAGACTGAAGCCACACAGCGTAATGCTCGCAACCATATCTGTAGTACGTCCCACACGAACAACCTT  
AACGAGGGTACTGAGTGTGATCGAACACGACAGGACAGACTGGGACGTAGGGAGGCGCACGAGGTGGAT  
AACCATAGTATAGAACCCCGCAGCACTGAGCGCAGCAATATGCATTGCCAAGGCGGATGACGTCGGGTG  
TGGACATGACTACGAGTAAGGGCTATTAGCTCACGACGATACGTGTGCTTACCTGGGATGTCTTCCACT  
TGGATTGACACGCTGAGCCGGTACGGATAGACTGCCACTTGGTCAAGATCTGTATTGGATTCATCACT  
ACGGATTACAGAGGACTACATCCCTTACAGACCTGAGGTCGCTTACTCTACTAACGATCACTCT  
CACTTTACCAGTCATATCGTCCGGCAGAGTGTACGAATGAATTAAGTGTGAGCTTCTGTGATCAGCA

REPTILIAN\_ORTHOREOVIRUS\_PROBE03  
REPTILIAN\_ORTHOREOVIRUS\_PROBE04  
REPTILIAN\_ORTHOREOVIRUS\_PROBE05  
REPTILIAN\_ORTHOREOVIRUS\_PROBE06  
REPTILIAN\_ORTHOREOVIRUS\_PROBE07  
REPTILIAN\_ORTHOREOVIRUS\_PROBE08  
REPTILIAN\_ORTHOREOVIRUS\_PROBE09  
REPTILIAN\_ORTHOREOVIRUS\_PROBE10  
REPTILIAN\_ORTHOREOVIRUS\_PROBE11  
REPTILIAN\_ORTHOREOVIRUS\_PROBE12  
REPTILIAN\_ORTHOREOVIRUS\_PROBE13  
ROTAVIRUS\_A\_PROBE01  
ROTAVIRUS\_A\_PROBE02  
ROTAVIRUS\_A\_PROBE03  
ROTAVIRUS\_A\_PROBE04  
ROTAVIRUS\_A\_PROBE05  
ROTAVIRUS\_A\_PROBE06  
ROTAVIRUS\_A\_PROBE07  
ROTAVIRUS\_A\_PROBE08  
ROTAVIRUS\_A\_PROBE09  
ROTAVIRUS\_A\_PROBE10  
ROTAVIRUS\_A\_PROBE11  
ROTAVIRUS\_A\_PROBE12  
ROTAVIRUS\_A\_PROBE13  
ROTAVIRUS\_A\_PROBE14  
ROTAVIRUS\_A\_PROBE15  
ROTAVIRUS\_A\_PROBE16  
ROTAVIRUS\_A\_PROBE17  
ROTAVIRUS\_A\_PROBE18  
ROTAVIRUS\_A\_PROBE19  
ROTAVIRUS\_A\_PROBE20  
ROTAVIRUS\_A\_PROBE21  
ROTAVIRUS\_A\_PROBE22  
ROTAVIRUS\_A\_PROBE23  
ROTAVIRUS\_A\_PROBE24  
ROTAVIRUS\_A\_PROBE25  
ROTAVIRUS\_A\_PROBE26  
ROTAVIRUS\_A\_PROBE27  
ROTAVIRUS\_A\_PROBE28  
ROTAVIRUS\_A\_PROBE29  
ROTAVIRUS\_A\_PROBE30  
ROTAVIRUS\_A\_PROBE31  
ROTAVIRUS\_A\_PROBE32  
ROTAVIRUS\_A\_PROBE33

GTTATTCAGTGGAGTATTTGTCACGTTATATCTTGCATGGCACTTATGGTGGTAGAACTCCTCTCCTTCC  
CTGAGTCACCGCCGTCTCCAAAGCCGCTATCTGCTCCACTTGTTTTCGAACTTGCCTAACTATCTCTTCA  
CAATTTGGTCAGGAGAGCCGAGTGATGGGGGTGACACCGTGGTAGCTCCAGCCTGTTACACGCCCCCGGCC  
CGAAATTTGTGAAGGTAGGCCAGGCTTATTGCTGCGCTCAATGTTGCGGGGTACTIONACTATGGAGCACCA  
ACTTTAATTCATTCGTACACTCTGCCGACGATATGACGGTGAAAGTGGTGAAGGCGATTACGATACTA  
TAGCGGAGATTTTGGATGGCGCAAAGATGTGGTCATCGGTCTCTACCACCTGAGACGCATATGGAAAA  
CCAGCTGGAGTGATGGTACAGCTGAGAGCGACAGTGGATGGCCCTCCCTCCCAAGTGTCTACATATGCG  
AGAAGAGAAAAGAAGGAGACAACACTGAGTTCCAAAAACGGTATCTACGGAATAGCTACAGGTTGAGTG  
GGCGGCATTAGAGGTATCGTTAGTAGAGATAAGGCGAGACCTGACGGTCTAGATGGGGATGTAGCCTCT  
GCGTAGCACGGTAACGGATTTAGGATCCTTAGTGAGTGACAGAGAAAGTGAAGTTGGACGGTGTGGCGAGA  
TTGGTCTTAGAAAACGACTGAAATATTTGGACTCTCATGGGCGCAGTCTGGAGTTGAGATGGGAGCCACA  
ACGTTGATGATGCAGCTATCTCATCAGCTATTCTGATTTCTGACTAGATAAAGACATAAACGCTCTTTG  
TAATGGCTACAGACGTCATTTGTATAATTTAGTTAATAAATCTCTATCAGTCTCAAATCCTCGTAA  
TTCCGTTAGCCATATCATCCATAACATGCATGTTTTCTTTGTAGAAAAAATTTGCTCTTTCCAAATTT  
GTATTCTGATCAATGATTCTAGATCTTTGAATTAATCTAATAATTGATAACATCCATAATTTATTGA  
TAACACCTGGAGTATATCTCCGTGAGCAATATCATCCATAACATGCATATTTTTCTAGTCGAGAATAT  
CGCACCTTCTGTTTTCTCATCTTGAATATGGCATCACAAACTTTGCCGTTTCAGAATCGACAACCTTTG  
GGGTCTGAGGGTCACCATTCCTATAATGCATTCTTGCATTCCGAATGCTGGATAAACAATGGTATTTAT  
TTCTGCTATTTGAAATGGTGTCTGTGGGTCTCCATTCTGTAATGCATCCGCTGCATTCCAAACGCTGGA  
TTTGAATCTGCTGCTCAGCAATTTGAAAAGGAGTTTGAGGATCACCATTCTATAATGCATTCTTTGCAT  
ATAGACACGCCAGCATCTGCATTTGTCTTAACTGCATTGATCTAATCGAGAAACTGGTGATGGATCGT  
TTTGAACCTGCAGATTGTGAGTTATATAAATGATAAATATTCTGACAAGATTAGATTATACTTCCCCAT  
CAGATTGTGAATTATAAACAATGATAAATATTCTGACAAGATTAGATTGACTTCCCATTTGTACAGCT  
GCCAATTGAAATGAAAGATAAATATTCTGACAAGATTAGATTATACTTCCCATTTGTATAGCTTTAATA  
CTGCAGATTGTGAATTATATAAACGATAAATATTCTGACAAGATTAGATTATACTTCCCATTTGTATA  
GAGATCTCAATGAAGTTATGTTCCACATTTTCTTCCAAAGTTAATCATTTCAGATTTTGGATAGTTACA  
TGTTTGTGGACTTGGTATGACGGTTGCATTTCCAATTAGCATGCATAGTGATGTGACCGAAGTTAACTGT  
TAATGTTTGTGGACTTGGTATAACAGTCGCATTTCCAATAAGCATACATAATGATGTAACCTGACGTTAAT  
TTCTGCTATCTGGAACGGTGTCTGTGGATCCCATTTCTATAGTGCATTGTTGCATTCCAAACGCTGGA  
AAAAGGAGTCTGGGGGTCACCATTCCTGTAGTGCATTCTTTGCATTCCAAAGGCTGGATATATGATGGTA  
TTCTGCTATTTGAAACGGAGTCTGGGGATCACCATTTCTATAATGCATTCTTTGCATTCCAAATGCTGGA  
TTGTCTTAACTGCATTGATCTAATCGAAAACTGGTGAGTGGATCGTTTGAAGCAGAATCAGATGGTCC  
CTGGTGAATAACTCCTGGCGTATATTTCCATTAGCCATATCATCCATTACATGCATATCTTTTTTGT  
CACGTTTTTCATTATTTAATAAATTTATACCAGCGCGGAAAAAATTTTGCCTCCTGCAATATATCTTTT  
CAGATTGCGAATTATAAACAAGATAAATATTCTGACAAGATTAGATTGACTTCCCATTTGTACAGCT  
CAGCTATCCCGATTTCTGACTAGACAATGACATGAATGCTCTTTGTATATACACTTCATCAATCAGTTGT  
TTTGAACCTGCAGATTGTGAATTATATAAATGATAGATATTCTGACAAGATTAGATTGACTTCCCAT  
CGCTTGTCCGGTTTGTATATCTCCAATTTTTCAATATTGACTCTTTTGGTTCAAATGTTGGTATCGTC  
TTTGAAATGTATCCCATATAGATTCAAAATTTATCATGTAATTCAGCCTATCCTGTAGTAAAACCTGGTC  
TTTTGTGGTTGAAGTCGGTATCCAATCATAATTTGCAACTAAGTAGAAATCATTAGAATCAGAATTTATT  
AGTCTGTGGATCACCATTCTATAATGCATTCTTTGCATTCCGAATGCCGGATAAACAATGGTATTTATT  
CACTGCACCTTCTGTTTCTCATCTTGAATATAGCATACATATACTTCCCGTTTTCAGAATCGACAAC  
AGTTCGTGATTGCGTCGATGAATCCATGACACGCCAGCGTCTGCATTTGTCTTAACTGATTCGATCTA  
ATCTACCATTATACATATCATCCATTACATGCATGTTCTTTTTCGTTGAAAAAATAGTTTTTCTTCCAAA

|                     |                                                                         |
|---------------------|-------------------------------------------------------------------------|
| ROTAVIRUS_A_PROBE34 | AACGTAACGACGTAATGTTCCACATTTTCTCCATAACTTTATCATTCTGATTTTGGATAGTTACAGAA    |
| ROTAVIRUS_A_PROBE35 | TTCCATTAGCCATGTCATCCATCACATGCATATTCTTTTAGTTGAAAAAATTGTTTTCTACCAAATTT    |
| ROTAVIRUS_A_PROBE36 | GTAGATTAATTCAGCTCTGAAAAATTTTTCTCCCGGCAATATATCTTTTAGCAATTTCTATGCCAC      |
| ROTAVIRUS_A_PROBE37 | TGTCAAAGTCTGAACATGTTGCATATTATCGTTACACATGCAATTAGTGTTCGTAGTTATAAGCTAGT    |
| ROTAVIRUS_A_PROBE38 | GGCACCAATTATAATTTACAACCTAGATAAAAATCATTAGAATCAGAATTTATTTAAATAGAATCGGTT   |
| ROTAVIRUS_A_PROBE39 | ACTAGGTATAACAGTTGCATTTCCAATGAGCATGCACAGCGATGTAACCTGAAGTTAGCTGTAATTTTCC  |
| ROTAVIRUS_A_PROBE40 | CATATGCATAGATGCTCTAAAATCAAATTGTTGTGGTATTTGTTTATAAACTTTTGTGTAGACGTTGGA   |
| ROTAVIRUS_A_PROBE41 | CTTCGCTTGTCCGGTTTGATATCTCCAGTTTCTCAATATTGACTCTTTTGGTTCAAATGTTGGTATC     |
| ROTAVIRUS_A_PROBE42 | AACTGCATTGATCTAATCGAAAACTGGTGAGTGGATCGTTTGAAGCAGAATCAGATGGTCCAATATCC    |
| ROTAVIRUS_B_PROBE01 | TATGTCAATCATTTTCCGTTACACATTTGTATCAATCTTTAGTTACGTCCATCCCTTGAAATGCTCT     |
| ROTAVIRUS_B_PROBE02 | AAATGTCGGCCGATCAACGGTCCATGCAATTAATTCATTGAATACCAAATTACACAAGTTGTCAAAAAGTA |
| ROTAVIRUS_B_PROBE03 | GTATCATTGCAGTGTGACGGCGGCTAAATTTGCGATTGATAAATCAGAAATGAGACTTTTCAAACGTAA   |
| ROTAVIRUS_B_PROBE04 | CTCTGACAGTTTCTCTAGGACATCACTATTGTCCGTTGTTTCAATCTGATTTCTGTAACCTTTTGGAC    |
| ROTAVIRUS_B_PROBE05 | GTGCGTTGTAATCATTTAACACGCTTTGTCCAGCTGTGTTTAGATTCTGATTTGGAGCTAAACCAAGTAC  |
| ROTAVIRUS_B_PROBE06 | TTGAGAGTTGATTGTTTCAGCGGAGTATACCGATGCTGCATCATCAAACTCGAAGATTTACTTTGCTT    |
| ROTAVIRUS_B_PROBE07 | CACAGATGCAAGAGCAGATGTCGTGGCGTCTGCGACAGTAAAAGAAATCTCAGCCATACGATAAATTGCA  |
| ROTAVIRUS_B_PROBE08 | TTGTTGTGTTGTATGAGCAGTTAGTGTGGCGATTTTCCAATCATAATCGCGTATACGTCTGTCGCATGAT  |
| ROTAVIRUS_C_PROBE01 | TACTCATCAAACATTGAATCTTCCGAATATGGTGAATTCATCGTTTTAACATTCCATAGCATACGCCACA  |
| ROTAVIRUS_C_PROBE02 | CTATTAACAATGCAGTCATATGAATACGCATTTCTCTTATCTGCTTCATTACCTCTTCATATTCTTCAT   |
| ROTAVIRUS_C_PROBE03 | TCCCTCCTGCATCCTTGATCGCTTTATCTAAAGAAGATGAAGCAGCTGATCCAGCTACGTTAAAGATCCA  |
| ROTAVIRUS_C_PROBE04 | CATCCACTTCATAATACGATGGTCCATTTGCGGAACAGTTTCATCTTTCTCCTGGATAGCATCTGCCGAC  |
| ROTAVIRUS_C_PROBE05 | CTTCAATATTAATTTGAAAGCTATTAGTGTCAATTAATTACATTTGTTAACCCGACATCTTCAACGTA    |
| ROTAVIRUS_C_PROBE06 | TTGAGAACCAGTTCTTGATTCTGTTTGGCCTTTTTTACATTGTCGCAAATGGCATCAAGATTAATTCCA   |
| ROTAVIRUS_C_PROBE07 | ATCTTCTAGCTGAAACGTAATCAGCATGAGTTTTTGAATCCCATATTGATTCAAATCCATCATGTAATCC  |
| ROTAVIRUS_C_PROBE08 | GCATAATTGCATCTCCATCAACCCGATCATTTTAAACGTCAAATGTATAATCTGTCATAAGTTTTCCGA   |
| ROTAVIRUS_C_PROBE09 | ATGAACGGGATGGCGTCCGTTCAACAGCAGGAAGCGCAGGGATTTTCATAGACAAACTTCCGTCTCTAATC |
| ROTAVIRUS_C_PROBE10 | CTTTAATTTTAACTTTCCTTCTTCAATCATTTTCACTGCATTTTGTTCATCATAATTACGTTTGTATGA   |

---

\* probe showed non specific reactivity and was eliminated from analysis
